# Supplementary material for: Rational molecular designs for drastic acceleration of the color-fading speed of photochromic naphthopyrans
Source: Royal Society of Chemistry journal article supplement (doi:10.1039/c4cc10294k), 2015-01-01
Supplement: c4cc10294k1.pdf [file c4cc10294k1.pdf]

# Electronic Supplementary Information for: **Rational Molecular Designs for Drastic Acceleration of Color-Fading Speed of Photochromic Naphthopyrans**

**Katsutoshi Arai<sup>†</sup>, Yoichi Kobayashi<sup>†</sup> and Jiro Abe<sup>\*,†,‡</sup>**

<sup>†</sup>*Department of Chemistry, School of Science and Engineering, Aoyama Gakuin University, 5-10-1 Fuchinobe, Chuo-ku, Sagamihara, Kanagawa 252-5258, Japan*

<sup>‡</sup>*CREST, Japan Science and Technology Agency (JST), K's Gobancho, 7 Gobancho, Chiyoda-ku, Tokyo 102-0076, Japan*

E-mail: [jiro\\_abe@chem.aoyama.ac.jp](mailto:jiro_abe@chem.aoyama.ac.jp)

## CONTENTS

|                                                                        |            |
|------------------------------------------------------------------------|------------|
| <b>1. Synthetic Procedures</b>                                         | <b>S2</b>  |
| <b>2. <sup>1</sup>H NMR Spectra</b>                                    | <b>S9</b>  |
| <b>3. HR-ESI-TOF-MS-Spectra</b>                                        | <b>S16</b> |
| <b>4. HPLC Chromatogram</b>                                            | <b>S23</b> |
| <b>5. X-ray Crystallographic Analysis</b>                              | <b>S29</b> |
| <b>6. UV-Vis Absorption Spectroscopy</b>                               | <b>S35</b> |
| <b>7. Kinetics for the Thermal Back-Reaction</b>                       | <b>S37</b> |
| <b>8. Fatigue Resistance</b>                                           | <b>S38</b> |
| <b>9. Transient Absorption Dynamics in Polymer Matrices</b>            | <b>S40</b> |
| <b>10. Experimental Detail for Laser Flash Photolysis Measurements</b> | <b>S42</b> |
| <b>11. DFT Calculations</b>                                            | <b>S42</b> |
| <b>12. References</b>                                                  | <b>S76</b> |



(spherical, neutral), 40–50  $\mu\text{m}$ , Kanto Chemical Co., Inc.).  $^1\text{H}$ -NMR spectra were recorded at 400 MHz on a Bruker AVANCE III 400 NanoBay.  $\text{DMSO}-d_6$  and  $\text{CDCl}_3$  were used as deuterated solvents. MASS spectra (ESI-TOF-MS) were measured by using a Bruker micrOTOF II-AGA1. All reagents were purchased from TCI, Wako Co. Ltd., Aldrich Chemical Company, Inc, and ACROS Organics. These reagents were used without further purification. 2-Iodoxybenzoic acid (IBX) were prepared according to a literature procedure.<sup>S1</sup> Phase separator paper (Whatman 1PS) was purchased from GE. All glassware was washed with distilled water and dried before use.

### 8-bromonaphthalen-2-ol (**1**)

8-Aminonaphthalen-2-ol (6.04 g,  $3.79 \times 10^{-2}$  mol) was dissolved in 48% aqueous HBr (48 mL). After cooling to  $-10\text{ }^\circ\text{C}$ , sodium nitrite (6.37 g,  $3.79 \times 10^{-2}$  mol) was added very slowly to the stirred solution with the temperature being kept within  $-10$  and  $0\text{ }^\circ\text{C}$ . This diazonium salt solution was then poured into a flask containing CuBr (4.17 g,  $2.91 \times 10^{-2}$  mol) and 10 mL of 48% aqueous HBr. The solution was heated to reflux for 3 h and then extracted three times with dichloromethane. The organic layers were washed with water, and passed through the phase separator. After the solvent was removed, the crude mixture was purified by silica gel column chromatography (ethyl acetate:hexane = 1:1), to give **1** as a brown solid (432 mg, yield : 7%).

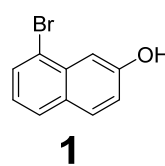

$^1\text{H}$  NMR (400 MHz,  $\text{CDCl}_3$ ):  $\delta$  7.82–7.70 (m, 3 H), 7.55 (s, 1H), 7.21–7.13 (m, 2H), 5.10 (s, 1H). HRMS (ESI-TOF) calculated for  $\text{C}_{10}\text{H}_7\text{O}$   $[\text{M}-\text{H}]^-$ : 220.9597, found: 220.9611.

### (2-isopropylphenyl)(4-methoxyphenyl)methanol (**2**)

*n*-Butyllithium (1.6 M in hexane, 1.5 mL) was added dropwise to a stirred solution of 2-bromocumene (0.35 mL) at  $-78\text{ }^\circ\text{C}$  in dry THF under  $\text{N}_2$ . On completion of the addition the reaction mixture was stirred for 30 min at  $-78\text{ }^\circ\text{C}$ . The *p*-anisaldehyde (0.2 mL) was added at  $-78\text{ }^\circ\text{C}$  to the reaction mixture. The mixture was allowed to warm to room temperature for 21 h with magnetic stirring. After the addition of  $\text{NH}_4\text{Cl}$  aq., the mixture was extracted with ethyl acetate. The solution was washed with water, and passed through phase separator paper. After the solvent was removed, the crude mixture was purified by silica gel column chromatography (ethyl acetate:hexane = 1:7), to give **2** as a white powder (353 mg, yield: 84%).

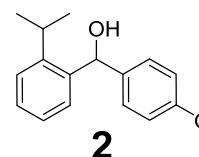

$^1\text{H}$  NMR (400 MHz,  $\text{CDCl}_3$ ):  $\delta$  7.50 (d,  $J$ =7.5 Hz, 2H), 7.32–7.26 (m, 2H), 7.25–7.18 (m, 3H), 6.84 (d,  $J$  = 8.7 Hz 1H), 6.11 (d,  $J$  = 3.9 Hz, 1H), 3.78 (s, 3H), 3.23–3.01 (m, 1H), 2.08 (d,  $J$  = 3.9 Hz, 1H), 1.20 (d,  $J$  = 6.8 3H), 1.00 (d,  $J$  =6.8 Hz, 3H). HRMS (ESI-TOF) calculated for  $\text{C}_{17}\text{H}_{20}\text{O}_2$   $[\text{M}+\text{Na}]^+$ : 279.1356, found: 279.1355.

### (2-isopropylphenyl)(4-methoxyphenyl)methanone (**3**)

(2-Isopropylphenyl)(4-methoxyphenyl)methanol (1.029 g, 4.01 mmol) and IBX (3.279 g, 11.7 mmol) were refluxed in acetonitrile (36 mL) for 1.5 h. The reaction mixture was filtrated and evaporated. After the solvents were removed, the sample was purified by column chromatography (silica gel, hexane:ethyl acetate = 15:1), to give **3** as a yellow solid (895 mg, 88%).

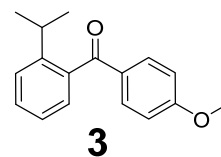

<sup>1</sup>H NMR (400 MHz, CDCl<sub>3</sub>): δ 7.80 (d, *J* = 8.9 Hz, 2 H), 7.47–7.40 (m, 2H), 7.26–7.17 (m, 2H), 6.92 (d, *J* = 8.9 Hz, 2H), 3.00 (s, 1H), 3.09 (m, 1H), 1.19 (d, *J* = 6.8 Hz, 6H). HRMS (ESI-TOF) calculated for C<sub>17</sub>H<sub>18</sub>O<sub>2</sub> [M+Na]<sup>+</sup>: 277.1199, found: 277.1195.

### 1-(2-isopropylphenyl)-1-(4-methoxyphenyl) prop-2-yn-1-ol (**4**)

*n*-Butyllithium (1.6 M in hexanes) was added over 5 min with a syringe to a cold (0 °C), stirred solution of trimethylsilylacetylene (1.1 mL) in anhydrous THF (30 mL) under N<sub>2</sub>. On completion of the addition (ca. 5 min), the cold solution was stirred for 30 min. A solution of

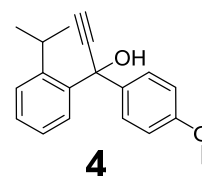

(2-isopropylphenyl)(4-methoxyphenyl)methanone (895 mg, 3.52 mmol) in THF (30 mL) was then added to the reaction mixture. The cooling bath was removed and the mixture stirred for 2 days at room temperature. After the addition of NH<sub>4</sub>Cl aq., the mixture was extracted with ethyl acetate. The solution was washed with water, and passed through the phase separator. After the solvent was removed, the crude mixture was purified by silica gel column chromatography (ethyl acetate:hexane = 1:8), to give **4** as a white powder (318 mg, yield : 32%).

<sup>1</sup>H NMR (400 MHz, CD<sub>2</sub>Cl<sub>2</sub>): δ 7.68 (d, *J* = 8.0 Hz, 1 H), 7.20–7.07 (m, 4H), 7.04–6.98 (m, 1H), 3.56 (s, 3H), 3.11–2.97 (m, 1H), 2.72 (s, 1H), 2.56 (s, 1H), 0.80 (d, *J* = 6.8 Hz, 3H), 0.48 (d, *J* = 6.8 Hz, 3H). HRMS (ESI-TOF) calculated for C<sub>19</sub>H<sub>20</sub>O<sub>2</sub> [M+Na]<sup>+</sup>: 303.1356, found: 303.1357.

### 3-(2-isopropylphenyl)-3-(4-methoxyphenyl)-3H-benzo[f]chromene (NP)

A solution of the 2-naphthol (79 mg, 5.47 × 10<sup>-1</sup> mmol) and 1-(2-isopropylphenyl)-1-(4-methoxyphenyl)prop-2-yn-1-ol (102 mg, 3.65 × 10<sup>-1</sup> mmol) and PTSA (3 mg, 1.86 × 10<sup>-2</sup> mmol) in dichloromethane (5 mL) were stirred for 5 h at room temperature. The mixture was extracted with ethyl acetate. The solution was washed with water, and passed through the phase separator. After the solvent was removed, the crude mixture was purified by silica gel column chromatography (ethyl acetate:hexane = 30:1) and recrystallized from dichloromethane/hexane to give **NP** as a yellow crystal (65 mg, yield : 44%).

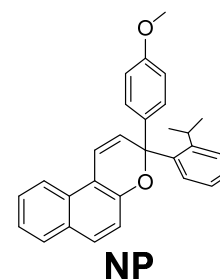

<sup>1</sup>H NMR (400 MHz, CD<sub>2</sub>Cl<sub>2</sub>): δ 7.91 (d, *J* = 8.4 Hz, 1 H), 7.64 (m, 2H), 7.60 (dd, *J* = 8.12 Hz, *J* = 1.0 Hz, 1H), 7.57 (d, *J* = 8.9 Hz, 1H), 7.27–7.16 (m, 4H), 7.13 (d, *J* = 8.8 Hz, 1H), 7.10–7.01 (m,

2H), 5.79 (d,  $J = 9.8$  Hz, 1H), 3.67 (s, 3H), 3.38–3.22 (m, 1H), 0.84 (d,  $J = 6.8$  Hz, 3H), 0.83 (d,  $J = 6.8$  Hz, 3H). HRMS (ESI-TOF) calculated for  $C_{29}H_{26}O_2$   $[M+H]^+$ : 407.2006, found: 407.2008.

#### 10-bromo-3-(2-isopropylphenyl)-3-(4-methoxyphenyl)-3H-benzo[f]chromene (10-Br-NP)

A solution of the 8-bromonaphthalene-2-ol (72 mg,  $3.21 \times 10^{-1}$  mmol) and 1-(2-isopropylphenyl)-1-(4-methoxyphenyl)prop-2-yn-1-ol (151 mg,  $5.38 \times 10^{-1}$  mmol) and PTSA (2 mg,  $1.16 \times 10^{-2}$  mmol) in dichloromethane (6 mL) were stirred for 8 h at room temperature. The mixture was extracted with ethyl acetate. The solution was washed with water, and passed through the phase separator. After the solvent was removed, the crude mixture was purified by silica gel column chromatography (ethyl acetate:hexane = 30:1) and recrystallized from dichloromethane/hexane to give **10-Br-NP** as a colorless crystal (88 mg, yield : 33%).

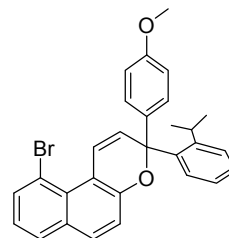

**10-Br-NP**

$^1H$  NMR (400 MHz,  $CD_2Cl_2$ ):  $\delta$  8.02 (d,  $J = 9.8$  Hz, 1 H), 7.64 (d,  $J = 8.1$  Hz, 1 H), 7.58 (d,  $J = 8.8$  Hz, 1H), 7.50 (dd,  $J = 7.9$  Hz,  $J = 1.3$  Hz, 1H), 7.44–7.36 (m, 1H), 7.29–7.14 (m, 6H), 7.08–6.97 (m, 2H), 6.78–6.73 (m, 1H), 3.68 (s, 3H), 3.39–3.25 (m, 1H), 0.96 (d,  $J = 6.8$  Hz, 3H), 0.82 (d,  $J = 6.8$  Hz, 3H). HRMS (ESI-TOF) calculated for  $C_{29}H_{25}BrO_2$   $[M+Na]^+$ : 507.0930, found: 507.0918.

#### 2-bromo-3-(2-isopropylphenyl)-3-(4-methoxyphenyl)-3H-benzo[f]chromene (2-Br-NP)

3-(2-Isopropylphenyl)-3-(4-methoxyphenyl)-3H-benzo[f]chromene (32 mg,  $7.77 \times 10^{-2}$  mmol) was dissolved in 15 mL of DMSO and magnetically stirred at room temperature. Water (100  $\mu$ L) was added to the solution in a single portion followed by the dropwise addition of NBS (184 mg, 1.03 mmol) over a period of 25 min. The reaction mixture was stirred for further 5 min until only traces of the starting material remained detectable by TLC monitoring. Then the reaction mixture was added to water. The aqueous phase was extracted with ethyl acetate. The solution was washed with water, and passed through the phase separator. After the solvent was removed, the crude mixture was purified by silica gel column chromatography (ethyl acetate:hexane = 1:6) and recrystallized from dichloromethane/hexane to give **2-Br-NP** as a colorless crystal (10 mg, yield : 27%).

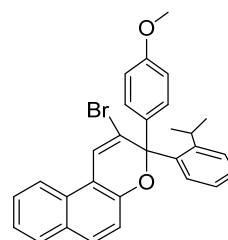

**2-Br-NP**

$^1H$  NMR (400 MHz,  $CD_2Cl_2$ ):  $\delta$  7.86 (d,  $J = 8.4$  Hz, 1 H), 7.82–7.67 (broad, 2H), 7.65 (d,  $J = 8.1$  Hz, 1H), 7.60 (d,  $J = 8.9$  Hz, 1H), 7.46–7.39 (m, 1H), 7.36–7.31 (m, 1H), 7.30–7.19 (m, 2H), 7.12–6.98 (m, 3H, broad), 6.97–6.91 (m, 1H), 6.89–6.56 (broad, 2H), 3.70 (s, 3H), 3.65–3.53 (m, 1H), 1.17 (d,  $J = 6.8$  Hz, 3H), 0.93 (d,  $J = 6.7$  Hz, 3H). HRMS (ESI-TOF) calculated for  $C_{29}H_{25}BrO_2$   $[M+Na]^+$ : 507.0930, found: 507.0925.

**2,10-dibromo-3-(2-isopropylphenyl)-3-(4-methoxyphenyl)-3H-benzo[f]chromene  
(2,10-Br-NP)**

10-Bromo-3-(2-isopropylphenyl)-3-(4-methoxyphenyl)-3H-benzo[f]chromene (32 mg,  $6.65 \times 10^{-2}$  mmol) was dissolved in 15 mL of DMSO and magnetically stirred at room temperature. Water (100  $\mu$ L) was added to the solution in a single portion followed by the dropwise addition of NBS (58 mg,  $3.26 \times 10^{-1}$  mmol) over a period of 25 min. The reaction mixture was stirred for further 5 min until only traces of the starting material remained detectable by TLC monitoring. Then the reaction mixture was added to water

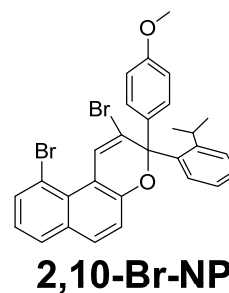

and extracted with ethyl acetate. The solution was washed with water, and passed through the phase separator. After the solvent was removed, the crude mixture was purified by silica gel column chromatography (ethyl acetate:hexane = 30:1) and recrystallized from dichloromethane/hexane/methanol to give **2,10-Br-NP** as a colorless crystal (8 mg, yield : 21%).

$^1\text{H}$  NMR (400 MHz,  $\text{CD}_2\text{Cl}_2$ ):  $\delta$  8.63 (s, 1H), 7.82 (dd,  $J = 7.5$  Hz,  $J = 1.1$  Hz, 1H), 7.56–7.69 (m, 2H), 7.12–7.09 (m, 7H, broad), 7.08–6.60 (m, 3H, broad), 3.84 (s, 3H), 3.67–3.52 (m, 1H), 1.20 (d,  $J = 6.8$  Hz, 3H), 0.95 (d,  $J = 6.7$  Hz, 3H). HRMS (ESI-TOF) calculated for  $\text{C}_{29}\text{H}_{24}\text{Br}_2\text{O}_2$   $[\text{M}+\text{Na}]^+$ : 585.0035, found: 585.0021.

**10-bromo-3,3-diphenyl-3H-benzo[f]chromene (5)**

A solution of the 10-bromonaphthalene-2-ol (246 mg, 1.10 mmol), 1,1-diphenylprop-2-yn-1-ol (591 mg, 2.84 mmol) and PTSA (10 mg,  $5.81 \times 10^{-2}$  mmol) in dichloromethane (40 mL) were stirred for 11 h at room temperature. The mixture was extracted with ethyl acetate. The solution was washed with water, and passed through the phase separator. After the solvent was removed, the crude mixture was purified by silica gel column chromatography (ethyl acetate:hexane = 30:1), to give **5** as a red powder (393 mg, yield : 33%).

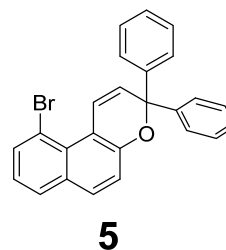

$^1\text{H}$  NMR (400 MHz,  $\text{DMSO}-d_6$ ):  $\delta$  8.16 (d,  $J = 9.9$  Hz, 1H), 7.89–7.88 (m, 3H), 7.64–7.56 (m, 4H), 7.51 (d,  $J = 8.8$  Hz, 1H), 7.44–7.38 (m, 4H), 7.36–7.28 (m, 2H), 6.45 (d,  $J = 9.9$  Hz, 1H). HRMS (ESI-TOF) calculated for  $\text{C}_{25}\text{H}_{17}\text{BrO}$   $[\text{M}+\text{Na}]^+$ : 435.0355, found: 435.0355.

**3,3,10-triphenyl-3H-benzo[f]chromene (6)**

10-Bromo-3,3-diphenyl-3H-benzo[f]chromene (170 mg,  $4.13 \times 10^{-1}$  mmol) and 1-phenylboronic acid (90 mg,  $7.41 \times 10^{-1}$  mmol) were added to a suspension of  $\text{Na}_2\text{CO}_3$  (293 mg, 27.7 mmol) in DME (6.5 mL) and  $\text{H}_2\text{O}$  (1.7 mL). The mixture was purged with  $\text{N}_2$  gas. Tetrakis(triphenylphosphine) (16 mg,  $1.40 \times 10^{-2}$  mmol) was added to the resulting solution and the solution

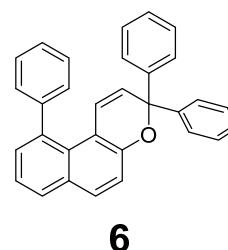

was refluxed for 13 h. The mixture was extracted with ethyl acetate. The solution was washed with water, and passed through the phase separator. After the solvent was removed, the crude mixture was purified by silica gel column chromatography (ethyl acetate:hexane = 30:1) to give **6** as a white powder (72 mg, yield: 42%).

<sup>1</sup>H NMR (400 MHz, DMSO-*d*<sub>6</sub>): δ 7.89 (d, *J* = 8.8 Hz, 1 H), 7.83 (dd, *J* = 8.05 Hz, *J* = 1.0 Hz, 1H), 7.58–7.44 (m, 7H), 7.44–7.32 (m, 7H), 7.29–7.21 (m, 2H), 7.17–7.11 (m, 2H), 6.00 (d, *J* = 9.7 Hz, 1H), 5.82 (d, *J* = 9.7 Hz, 1H). HRMS (ESI-TOF) calculated for C<sub>31</sub>H<sub>22</sub>O [M+Na]<sup>+</sup>: 433.1563, found: 433.1573.

### 2-bromo-3,3,10-triphenyl-3H-benzo[f]chromene (7)

3,3,10-Triphenyl-3H-benzo[f]chromene (32 mg, 7.67 × 10<sup>-2</sup> mmol) was dissolved in 5 mL of DMSO and magnetically stirred at room temperature. Water (0.6 mL) was added to the solution in a single portion followed by the dropwise addition of NBS (233 mg, 1.31 mmol) over a period of 15 min. The reaction mixture was stirred for further 5 min until only traces of starting material remained detectable by TLC monitoring. Then the reaction mixture was poured into water. The aqueous phase was extracted with ethyl acetate. The solution was washed with water, and passed through phase separator paper. After the solvent was removed, the crude mixture was purified by silica gel column chromatography (ethyl acetate:hexane = 1:10), to give **7** as a yellow powder (21 mg, yield : 56%).

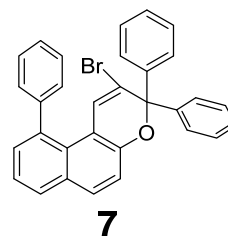

<sup>1</sup>H NMR (400 MHz, CDCl<sub>3</sub>): δ 7.75–7.69 (m, 2H), 7.55–7.41 (m, 7H), 7.39–7.29 (m, 8H), 7.24–7.26 (m, 3H), 6.41 (s, 1H). HRMS (ESI-TOF) calculated for C<sub>31</sub>H<sub>21</sub>BrO [M+Na]<sup>+</sup>: 511.0668, found: 511.0657.

### 2,3,3,10-tetraphenyl-3H-benzo[f]chromene (2,10-Ph-NP)

2-Bromo-3,3,10-triphenyl-3H-benzo[f]chromene (95 mg, 1.95 × 10<sup>-1</sup> mmol) and 1-phenylboronic acid (42 mg, 7.41 × 10<sup>-1</sup> mmol) were dissolved in 1.8 mL of THF and 0.33 mL of aqueous 2.9 M NaOH and the mixture was purged with N<sub>2</sub> gas. Tetrakis(triphenylphosphine) (13 mg, 1.15 × 10<sup>-2</sup> mmol) was added to the resulting solution and the solution was refluxed for 13 h. The mixture was extracted with ethyl acetate. The solution was washed with water, and passed through the phase separator. After the solvent was removed, the crude mixture was purified by silica gel column chromatography (ethyl acetate:hexane = 1:10) and recrystallized from dichloromethane/hexane/methanol to give **2,10-Ph-NP** as a colorless crystal (69 mg, yield: 72%).

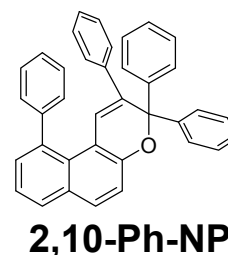

<sup>1</sup>H NMR (400 MHz, DMSO-*d*<sub>6</sub>): δ 7.89 (d, *J* = 8.9 Hz, 1 H), 7.85 (d, *J* = 8.2 Hz, 1H), 7.52 (d, *J* = 7.6 Hz, 2H), 7.45–7.23 (m, 14H), 7.15 (d, 7.9 Hz, 2H), 7.03–6.90 (m, 3H), 6.54–6.47 (m, 2H), 6.25

(s, 1H). HRMS (ESI-TOF) calculated for  $C_{37}H_{26}O$   $[M+Na]^+$ : 509.1876, found: 509.1874.

### 2-bromo-3,3-diphenyl-3H-benzo[f]chromene (**8**)

3,3-Diphenyl-3H-benzo[f]chromene (338 mg,  $1.01 \times 10^{-1}$  mmol) was dissolved in 20 mL DMSO and magnetically stirred at room temperature. Water (0.13 mL) was added to the solution in a single portion followed by the dropwise addition of NBS (459 mg, 2.58 mmol) over a period of 15 min. The reaction mixture was stirred for further 5 min until only traces of starting material remained detectable by TLC monitoring. Then the reaction mixture was poured into water and extracted with ethyl acetate. The solution was washed with water, and passed through the phase separator. After the solvent was removed, the crude mixture was dissolved in 10 mL of toluene. 4-Toluenesulfonic acid monohydrate (25 mg,  $1.45 \times 10^{-1}$  mmol) was added in a single portion and the resulting suspension was heated to reflux for 2.5 h until only traces of the starting material remained detectable by TLC monitoring. The mixture was extracted with ethyl acetate. The solution was washed with water, and passed through phase separator paper. After the solvent was removed, the crude mixture was purified by silica gel column chromatography (ethyl acetate:hexane = 1:20), to give **8** as a white powder (354 mg, yield: 85%).

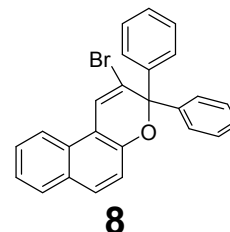

$^1H$  NMR (400 MHz,  $CDCl_3$ ):  $\delta$  7.92 (d,  $J$  = 8.5 Hz, 1H), 7.81 (s, 1H), 7.71 (d,  $J$  = 8.0 Hz 1H), 7.66 (d,  $J$  = 8.85 Hz, 1H), 7.55–7.45 (m, 5H), 7.37–7.29 (m, 7H), 7.15 (d,  $J$  = 8.8 Hz, 1H). HRMS (ESI-TOF) calculated for  $C_{25}H_{17}BrO$   $[M+Na]^+$ : 435.0355, found: 435.0347.

### 3,3-diphenyl-2-(pyren-1-yl)-3H-benzo[f]chromene (**2-Py-NP**)

2-Bromo-3,3-diphenyl-3H-benzo[f]chromene (73 mg,  $1.76 \times 10^{-1}$  mmol) and 1-pyreneboronic Acid (71 mg,  $2.89 \times 10^{-1}$  mmol) were dissolved in 2.6 mL of THF and 0.33 mL of aqueous 3.0 M NaOH and the mixture was purged with  $N_2$  gas. Tetrakis(triphenylphosphine) (8.6 mg,  $7.44 \times 10^{-3}$  mmol) was added to the resulting solution and refluxed for 15 h. The mixture was extracted with ethyl acetate. The solution was washed with water, and passed through phase separator paper. After the solvent was removed, the crude mixture was purified by silica gel column chromatography (ethyl acetate:hexane = 1:5) and recrystallized from methanol/ ethyl acetate to give **2-Py-NP** as a yellow crystal (83 mg, yield: 88%).

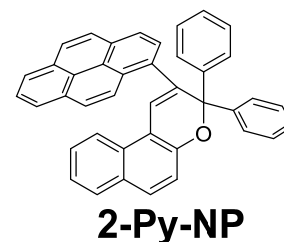

$^1H$  NMR (400 MHz,  $CDCl_3$ ):  $\delta$  8.46 (d,  $J$  = 9.3 Hz, 1H), 8.18–8.07 (m, 2H), 8.05–7.80 (m, 9H, broad), 7.76 (d,  $J$  = 8.0 Hz 1H), 7.69 (d,  $J$  = 8.9 Hz, 1H), 7.64 (s, 1H), 7.48–7.28 (m, 7H, broad), 7.22 (d,  $J$  = 8.8 Hz, 1H), 6.95–6.97 (m, 3H, broad). HRMS (ESI-TOF) calculated for  $C_{41}H_{26}O$   $[M+Na]^+$ : 557.1876, found: 557.1868.



## 2. $^1\text{H}$ NMR Spectra

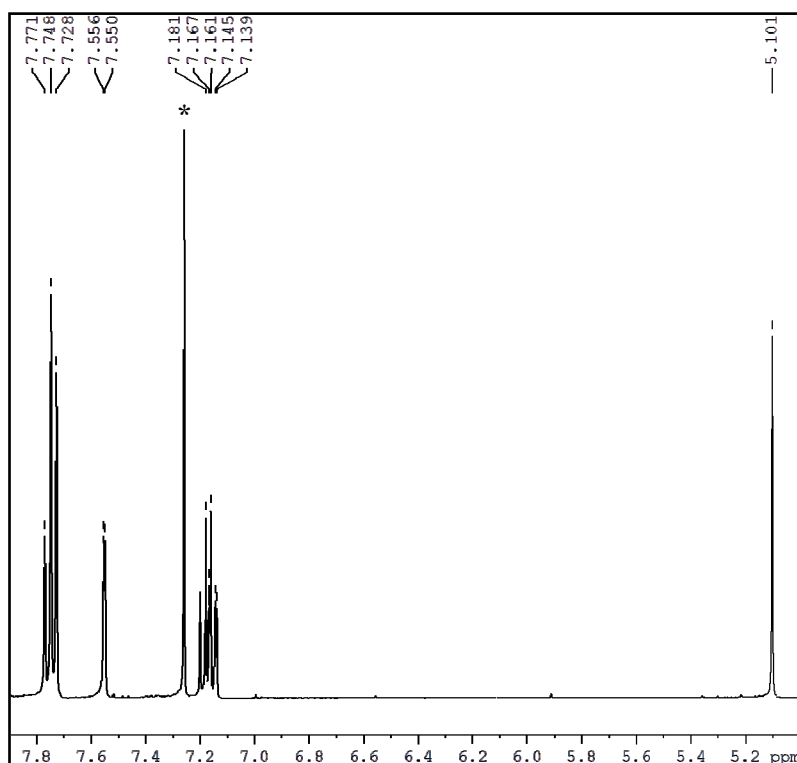

Fig. S1  $^1\text{H}$  NMR spectrum (400 MHz) of **1** in  $\text{CDCl}_3$  (\* solvent peaks).

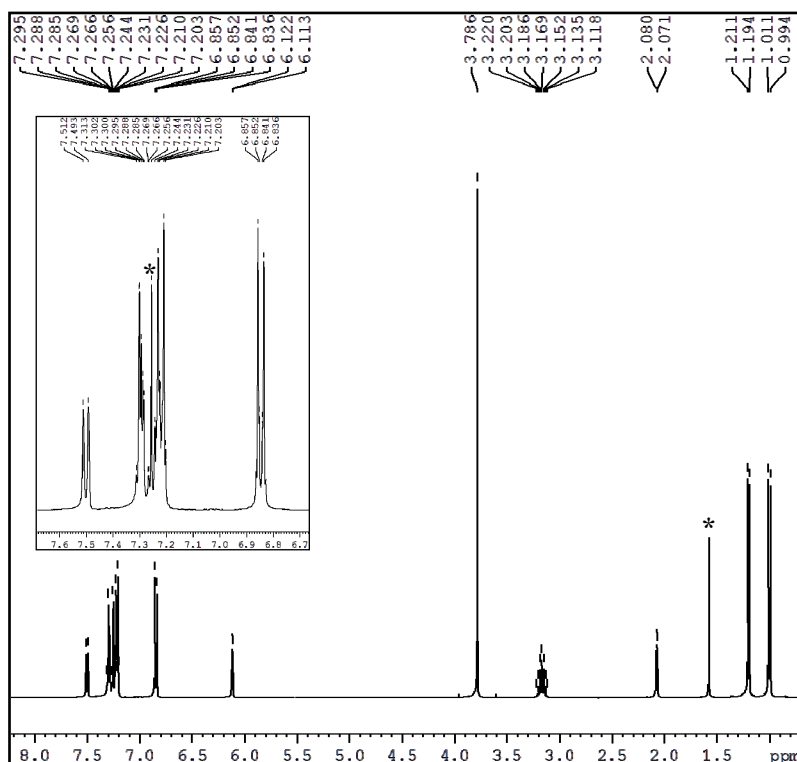

Fig. S2  $^1\text{H}$  NMR spectrum (400 MHz) of **2** in  $\text{CDCl}_3$  (\* solvent peaks).

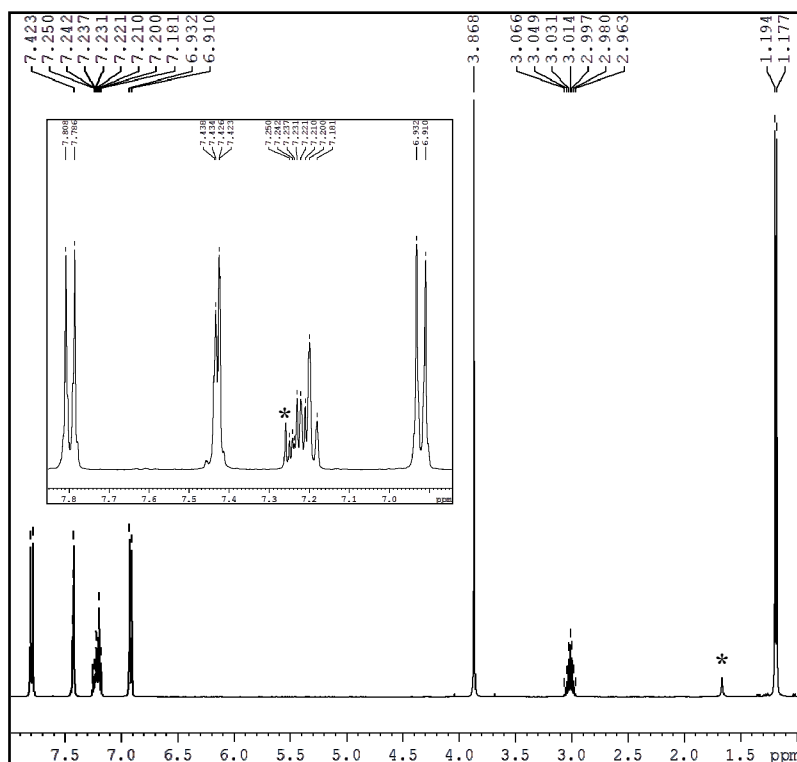

Fig. S3 <sup>1</sup>H NMR spectrum (400 MHz) of **3** in CDCl<sub>3</sub> (\* solvent peaks).

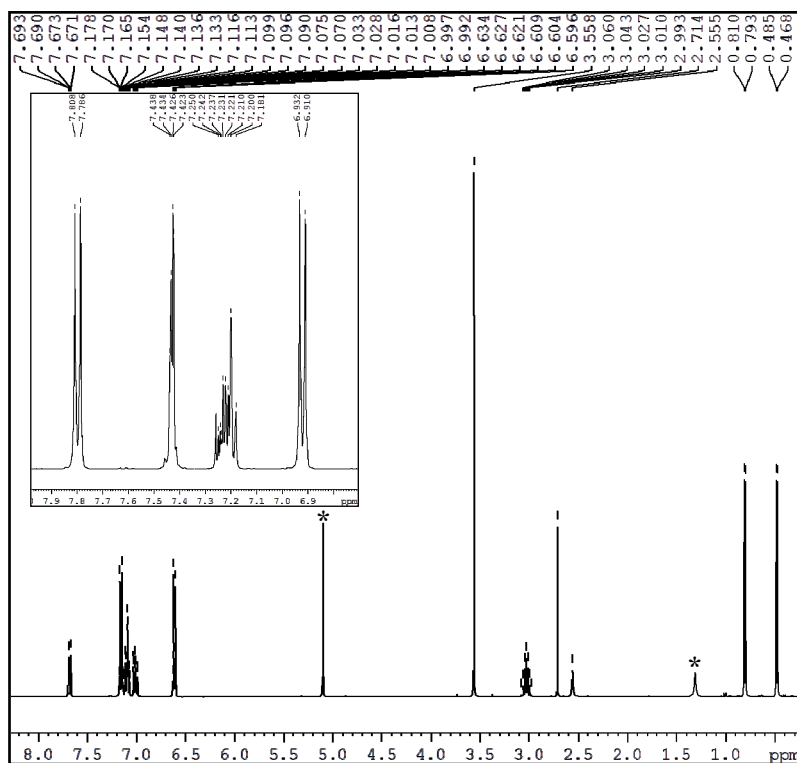

Fig. S4 <sup>1</sup>H NMR spectrum (400 MHz) of **4** in CD<sub>2</sub>Cl<sub>2</sub> (\* solvent peaks).

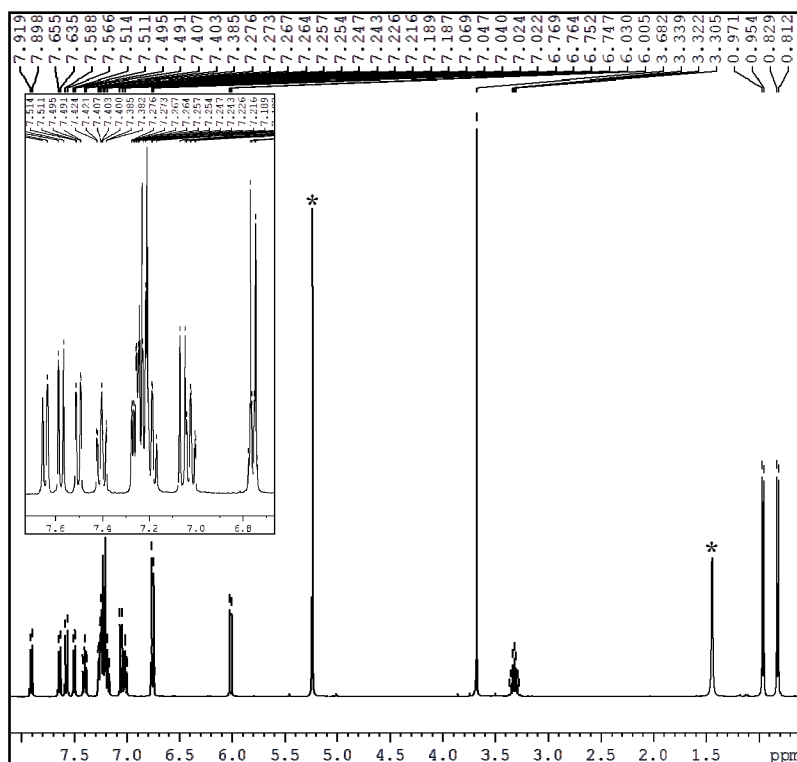

Fig. S5  $^1\text{H}$  NMR spectrum (400 MHz) of **NP** in  $\text{CD}_2\text{Cl}_2$  (\* solvent peaks).

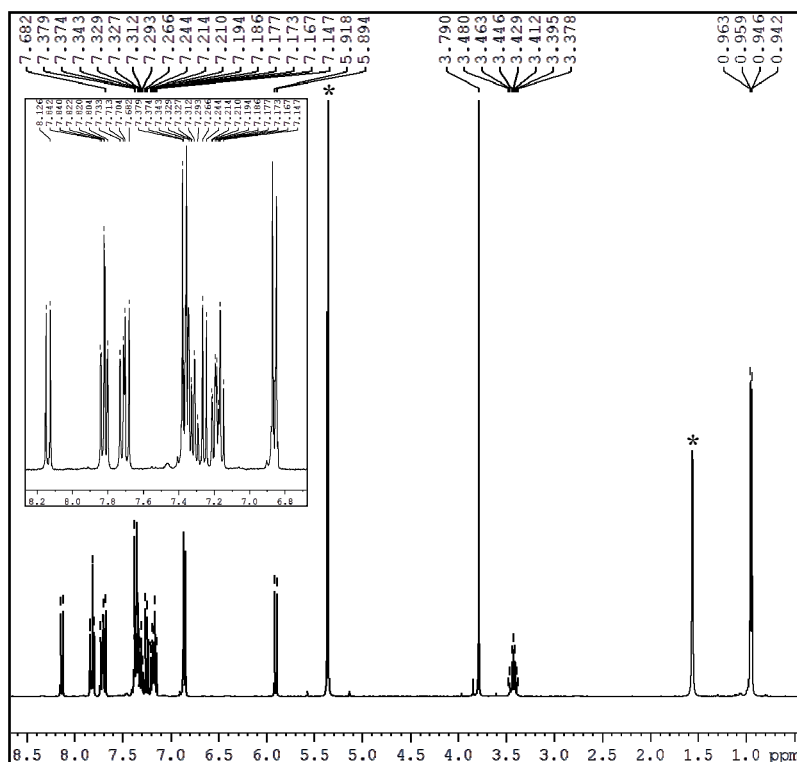

Fig. S6  $^1\text{H}$  NMR spectrum (400 MHz) of **10-Br-NP** in  $\text{CD}_2\text{Cl}_2$  (\* solvent peaks).

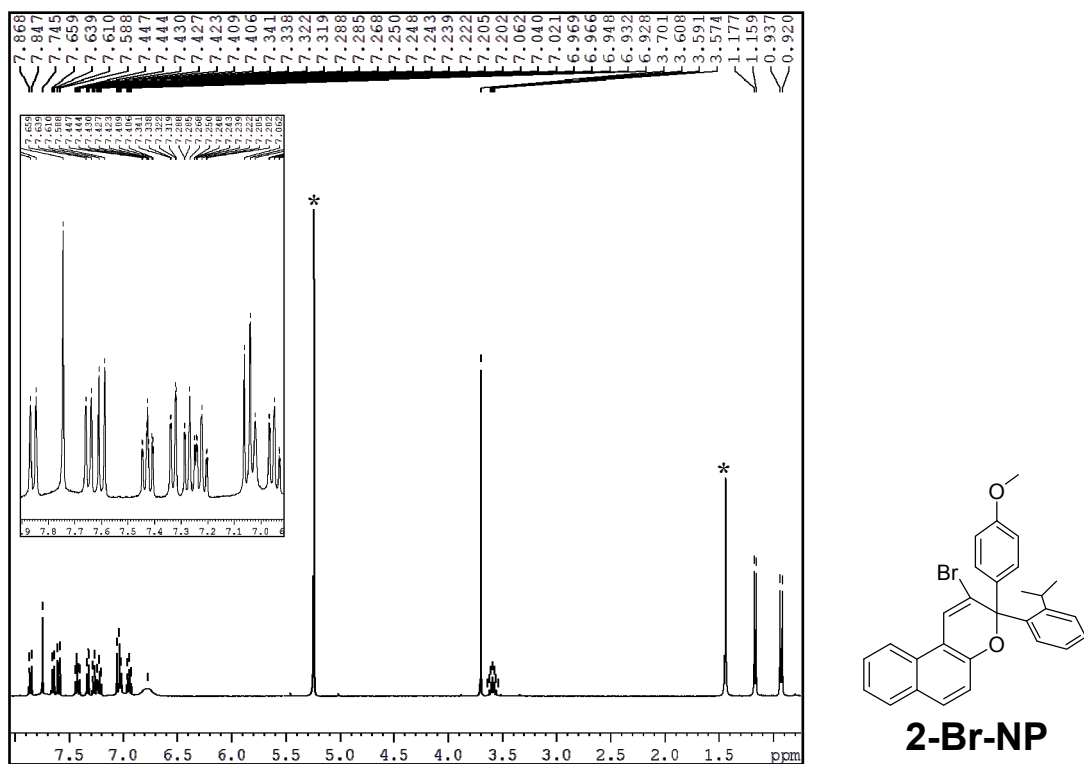

Fig. S7  $^1\text{H}$  NMR spectrum (400 MHz) of **2-Br-NP** in  $\text{CD}_2\text{Cl}_2$  (\* solvent peaks).

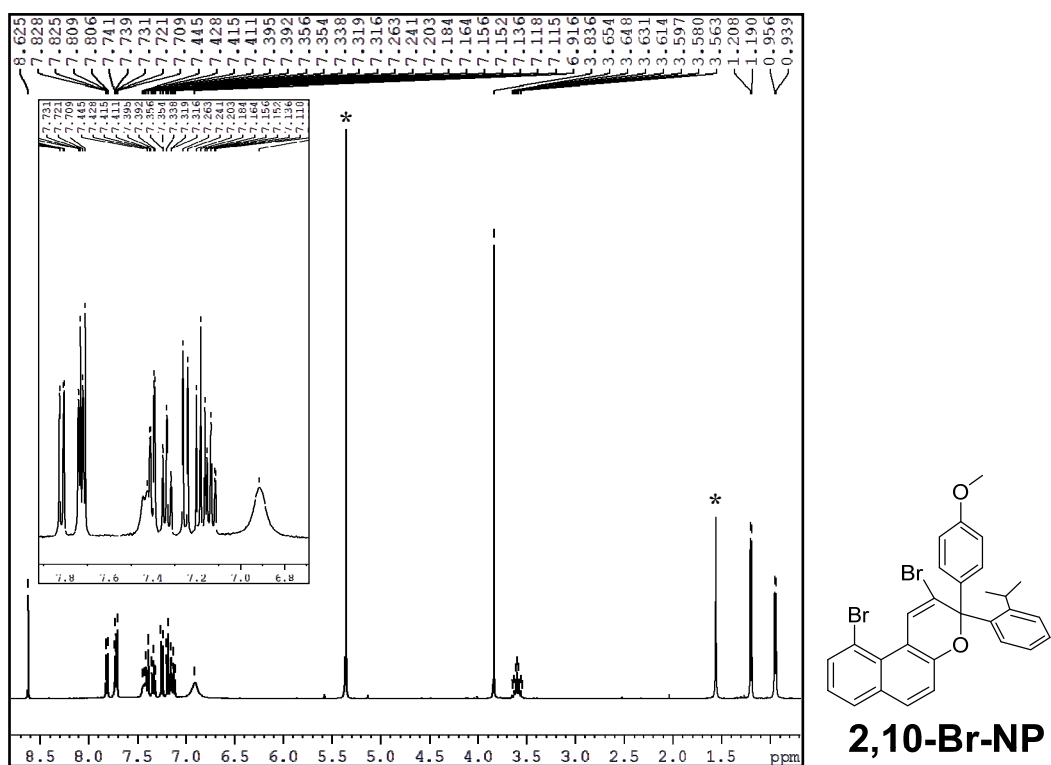

Fig. S8  $^1\text{H}$  NMR spectrum (400 MHz) of **2,10-Br-NP** in  $\text{CD}_2\text{Cl}_2$  (\* solvent peaks).

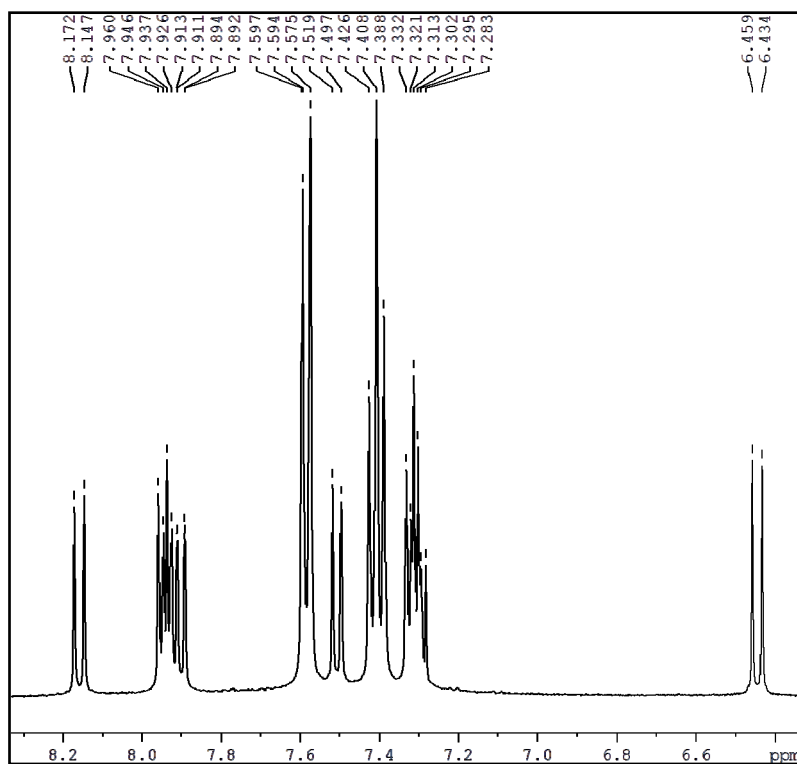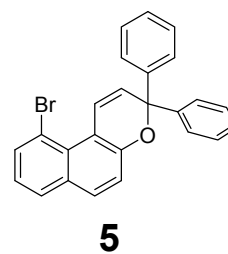

Fig. S9  $^1\text{H}$  NMR spectrum (400 MHz) of **5** in  $\text{DMSO}-d_6$ .

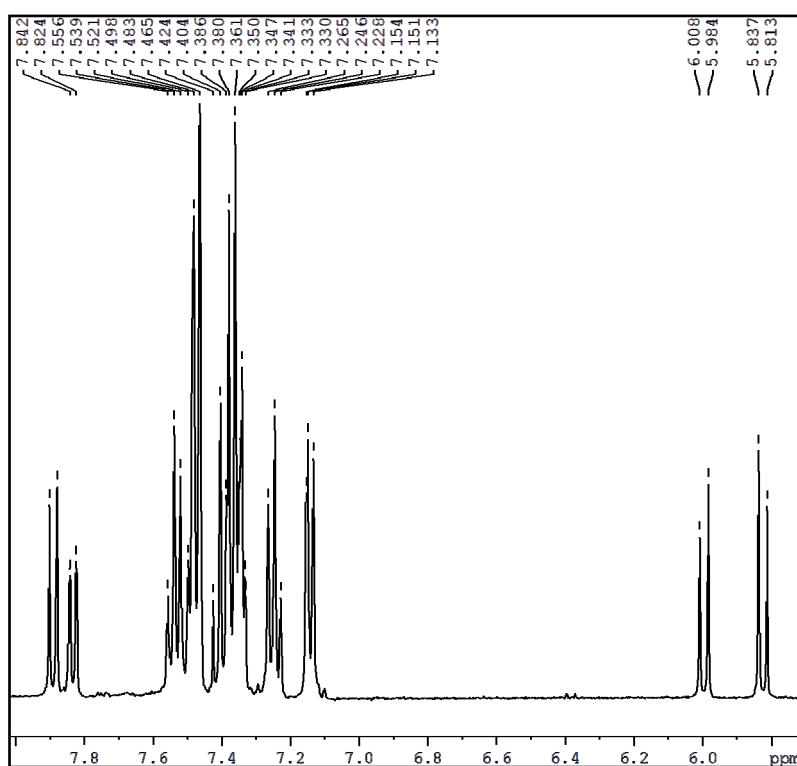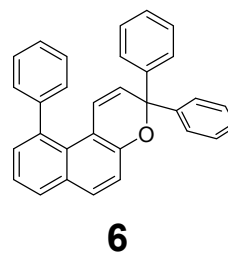

Fig. S10  $^1\text{H}$  NMR spectrum (400 MHz) of **6** in  $\text{DMSO}-d_6$ .

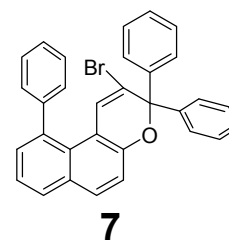

**2,10-Ph-NP**



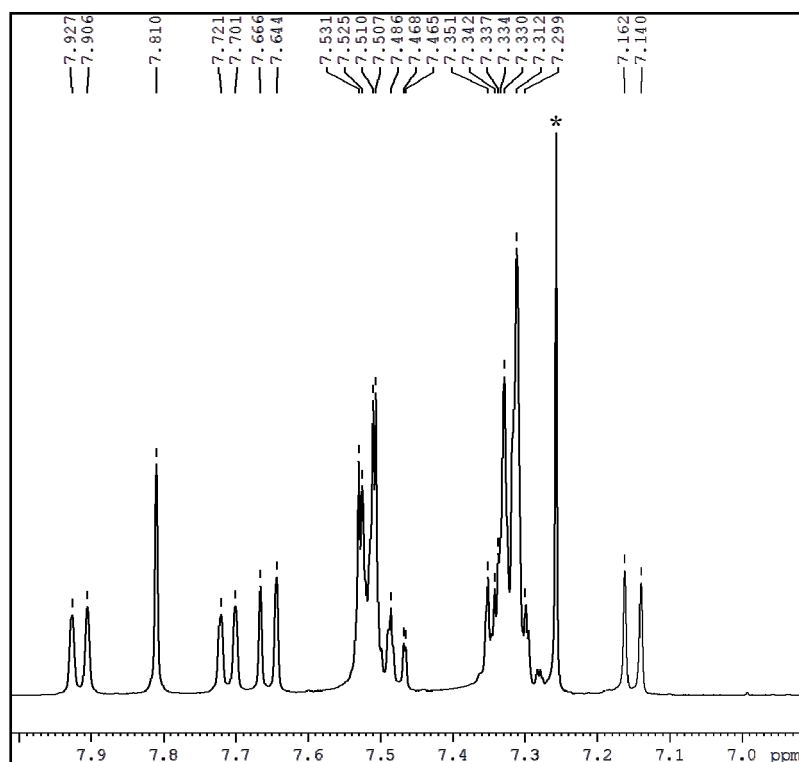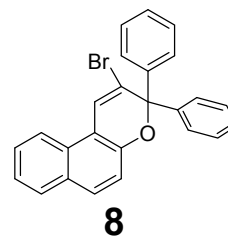

Fig. S13  $^1\text{H}$  NMR spectrum (400 MHz) of **8** in  $\text{CDCl}_3$  (\* solvent peaks).

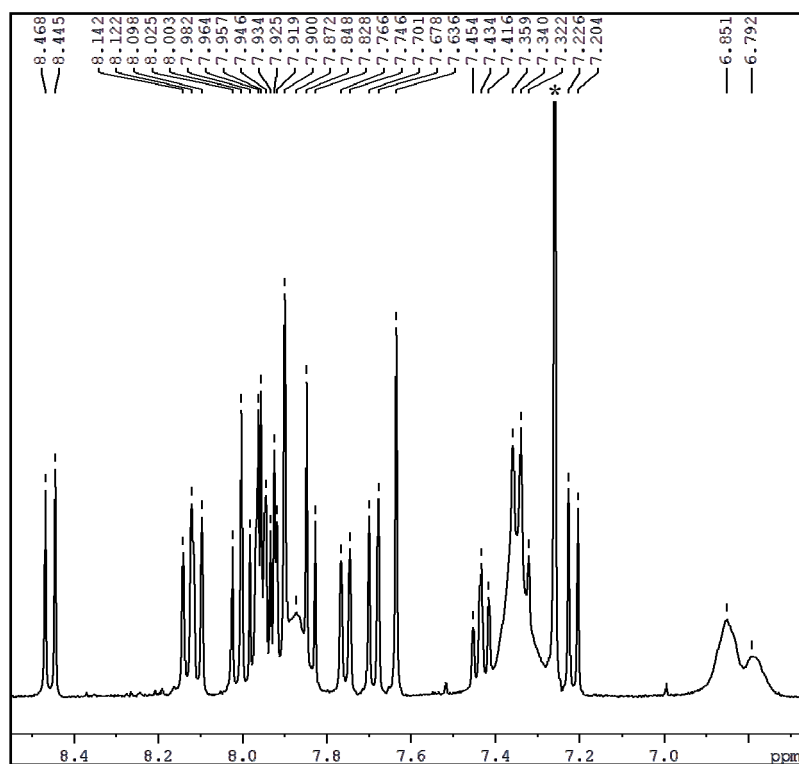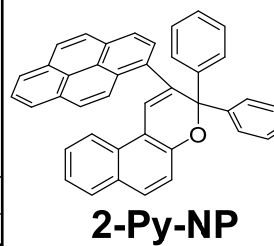

Fig. S14  $^1\text{H}$  NMR spectrum (400 MHz) of **2-Py-NP** in  $\text{CDCl}_3$  (\* solvent peaks).

### 3. HR-ESI-TOF-MS

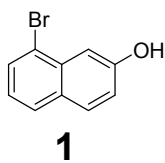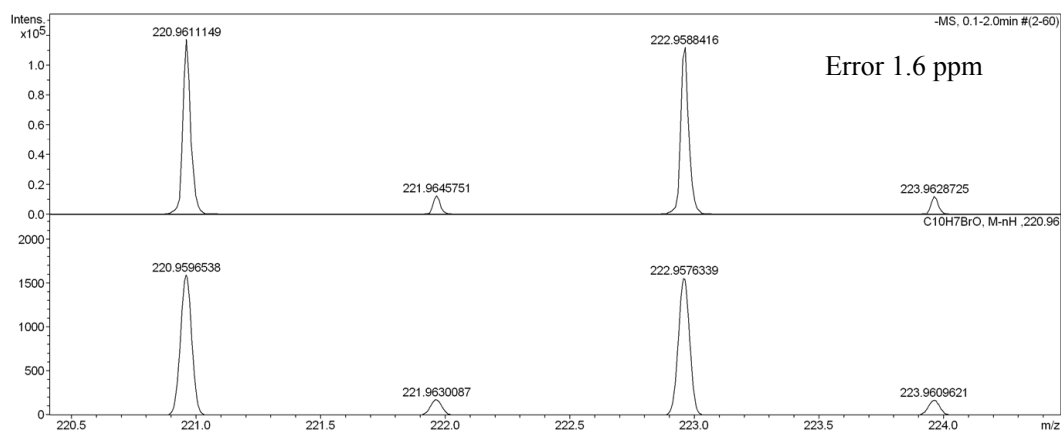

Fig. S15 HR-ESI-TOF-MS of **1**.

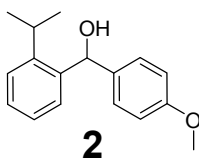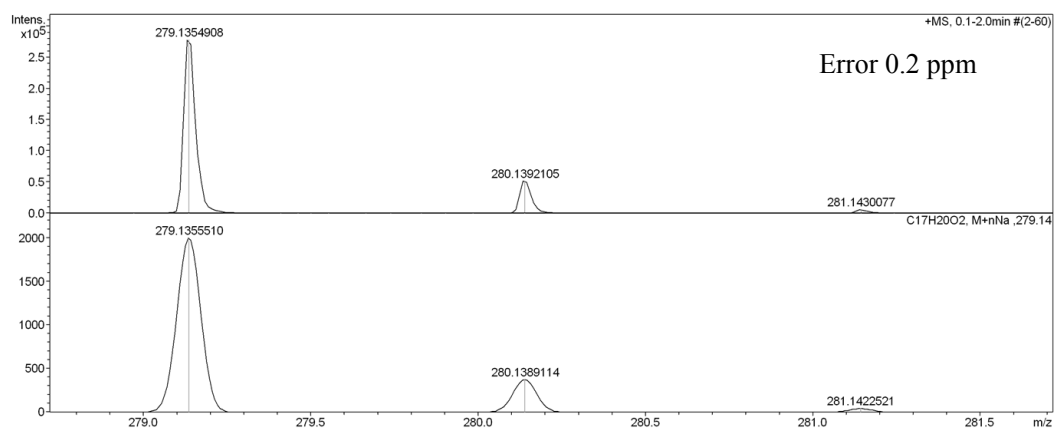

Fig. S16 HR-ESI-TOF-MS of **2**.



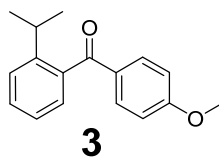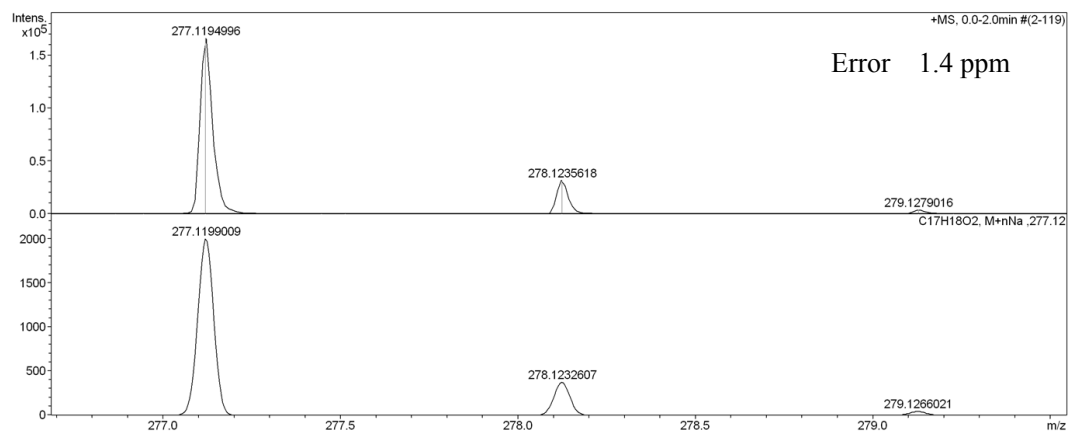

Fig. S17 HR-ESI-TOF-MS of **3**.

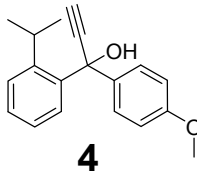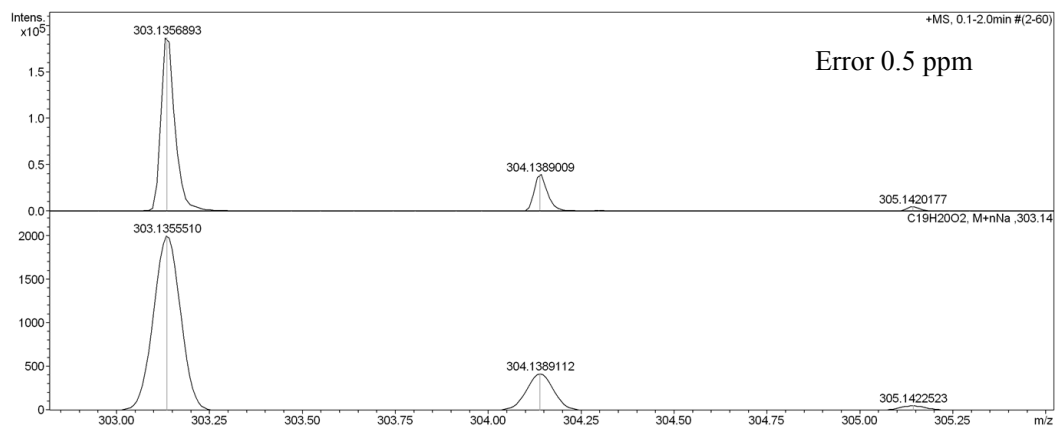

Fig. S18 HR-ESI-TOF-MS of **4**.

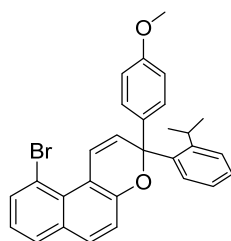

**10-Br-NP**

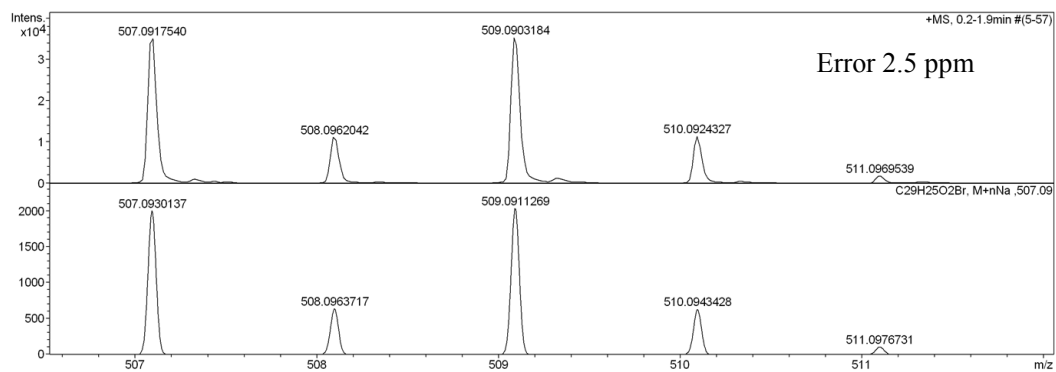

Fig. S19 HR-ESI-TOF-MS of **10-Br-NP**.

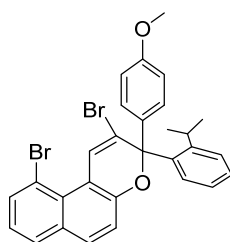

**2,10-Br-NP**

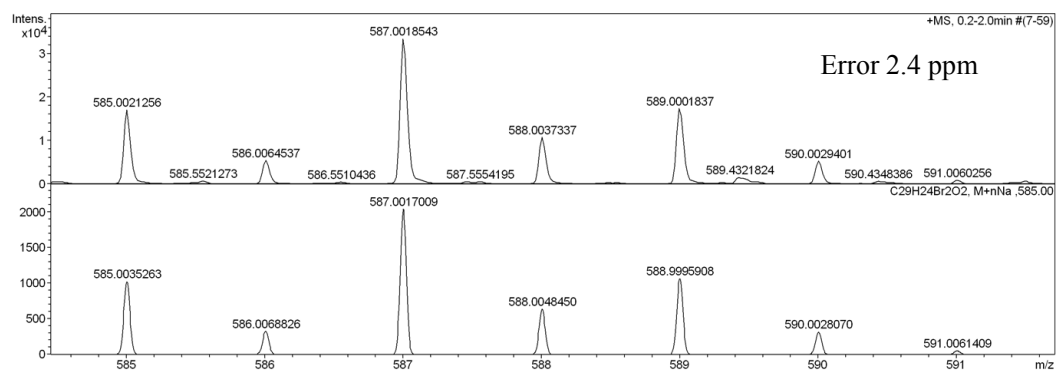

Fig. S20 HR-ESI-TOF-MS of **2,10-Br-NP**.

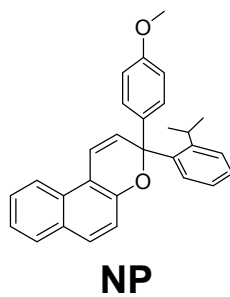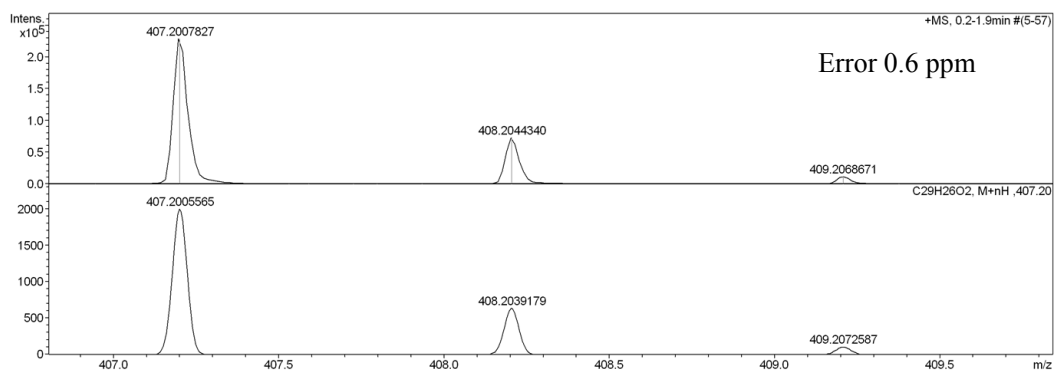

Fig. S21 HR-ESI-TOF-MS of NP.

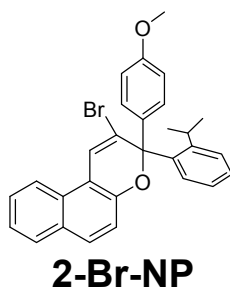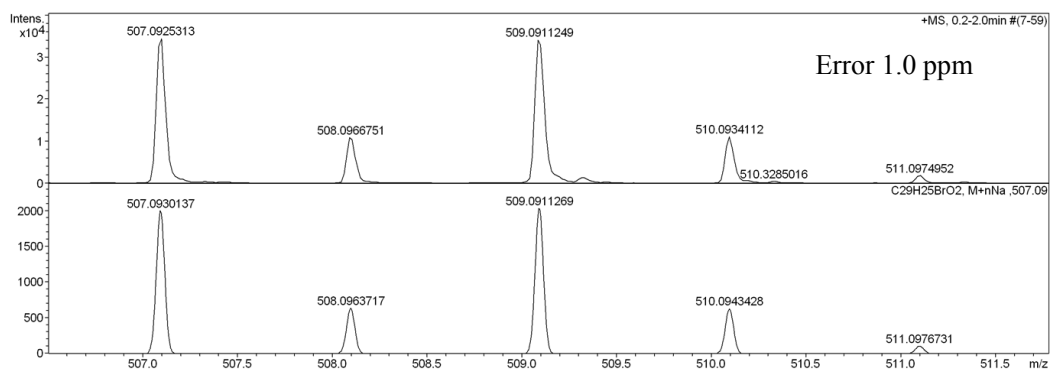

Fig. S22 HR-ESI-TOF-MS of 2-Br-NP.

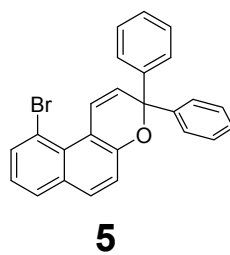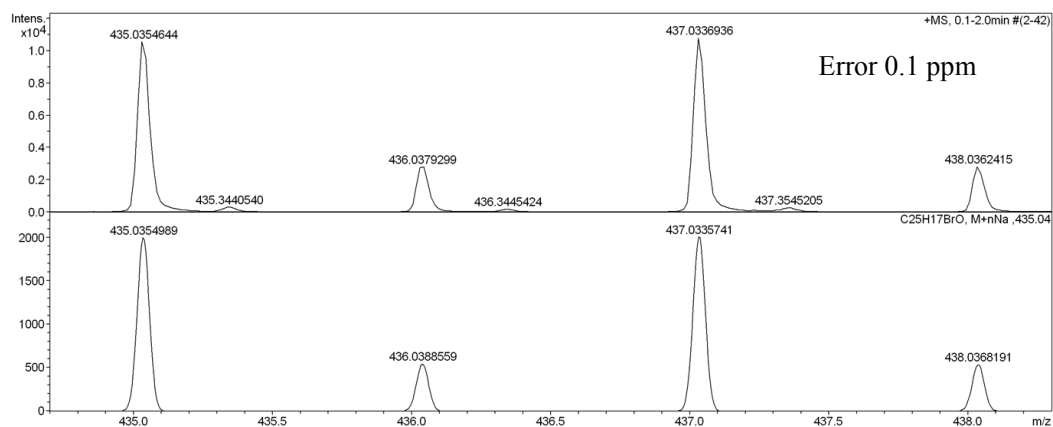

Fig. S23 HR-ESI-TOF-MS of **5**.

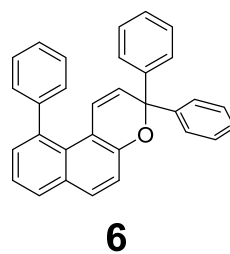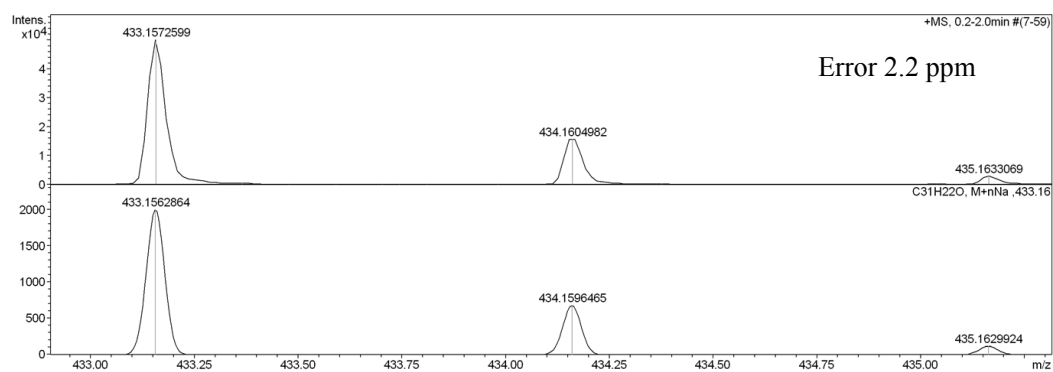

Fig. S24 HR-ESI-TOF-MS of **6**.

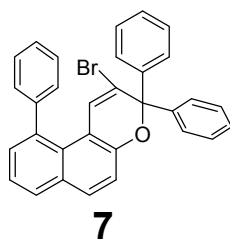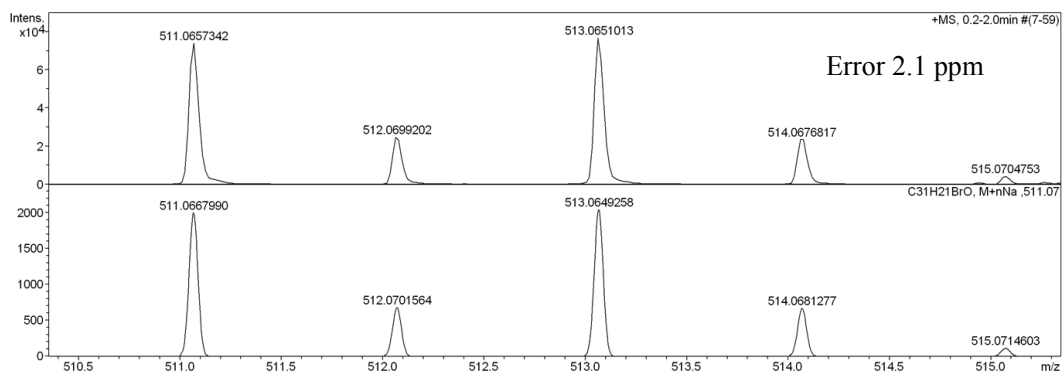

Fig. S25 HR-ESI-TOF-MS of **7**.

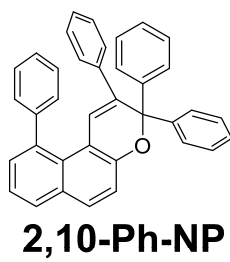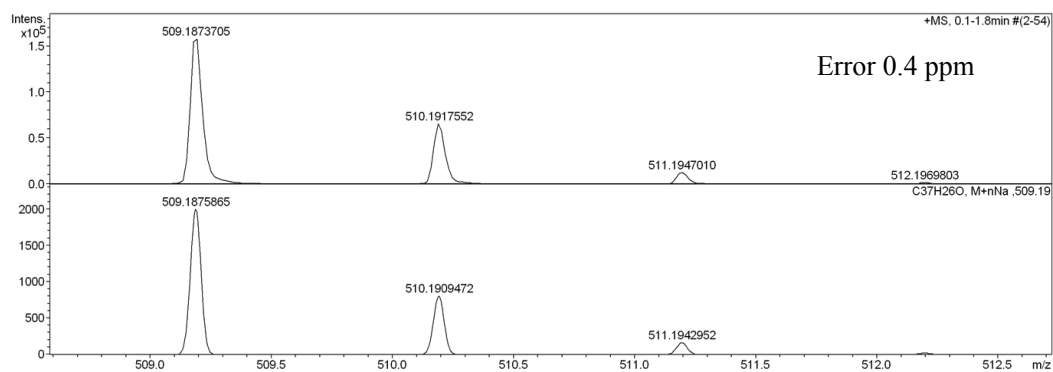

Fig. S26 HR-ESI-TOF-MS of **2,10-Ph-NP**.

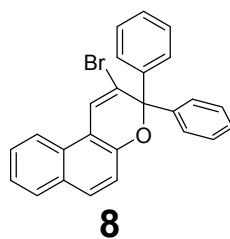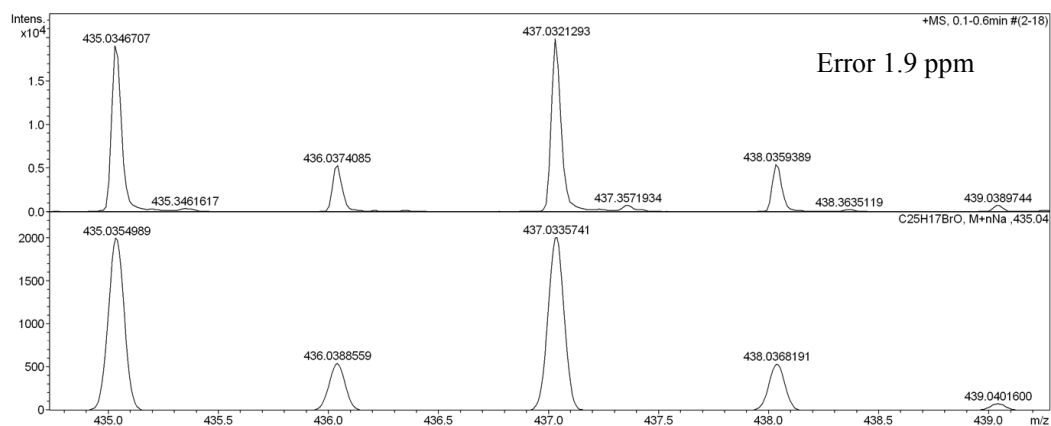

Fig. S27 HR-ESI-TOF-MS of **8**.

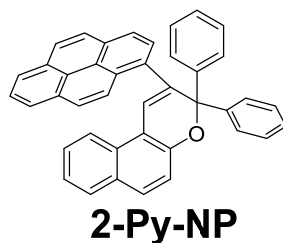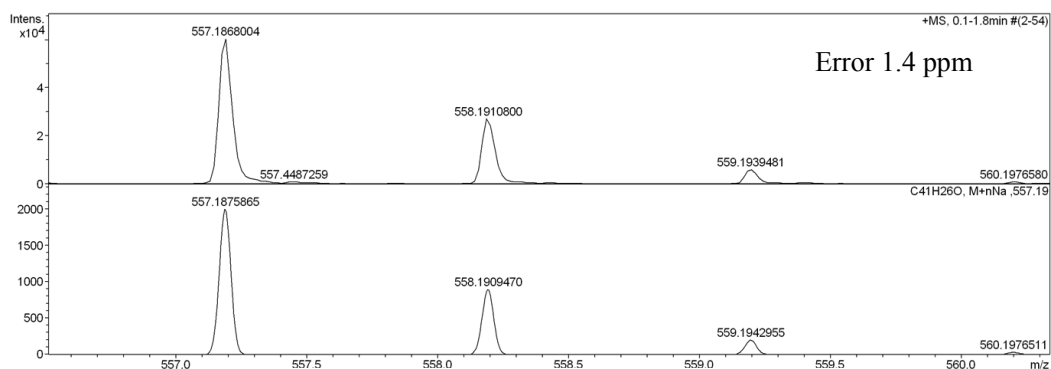

Fig. S28 HR-ESI-TOF-MS of **2-Py-NP**.

#### 4. HPLC Chromatograms

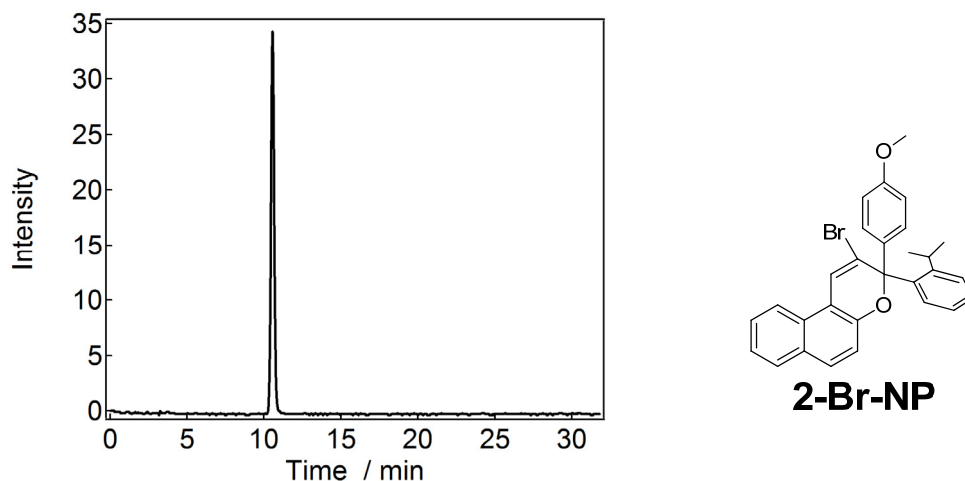

Fig. S29. HPLC chromatogram of **2-Br-NP**; 99% purity. HPLC analysis was performed using a reverse phase analytical column (Mightysil RP18, 25 cm  $\times$  4.6 mm, 5  $\mu$ m particle) from Kanto Chemical Industries, equipped with a UV detector; the mobile phase was MeOH:H<sub>2</sub>O = 95:5 with a flow rate of 1.0 mL/min, detection wavelength; 254 nm.

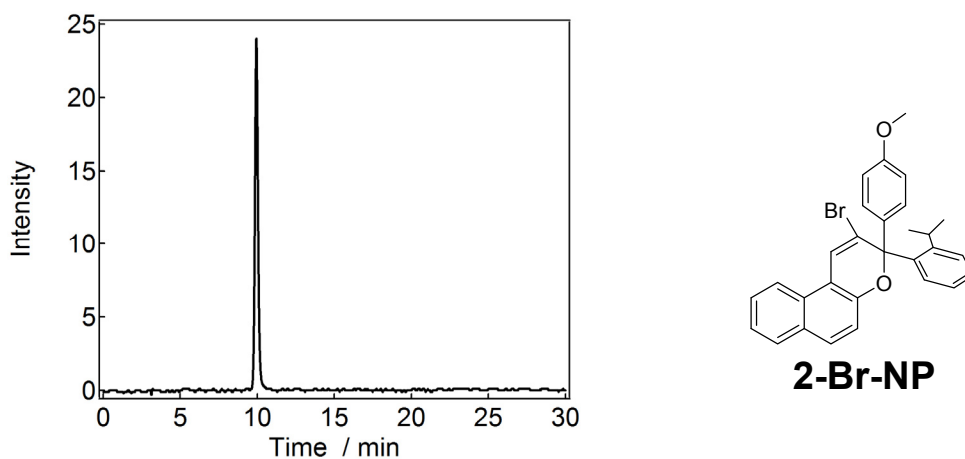

Fig. S30. HPLC chromatogram of **2-Br-NP**; 99% purity. HPLC analysis was performed using a reverse phase analytical column (Mightysil RP18, 25 cm  $\times$  4.6 mm, 5  $\mu$ m particle) from Kanto Chemical Industries, equipped with a UV detector; the mobile phase was MeOH:H<sub>2</sub>O = 95:5 with a flow rate of 1.0 mL/min, detection wavelength; 355 nm.

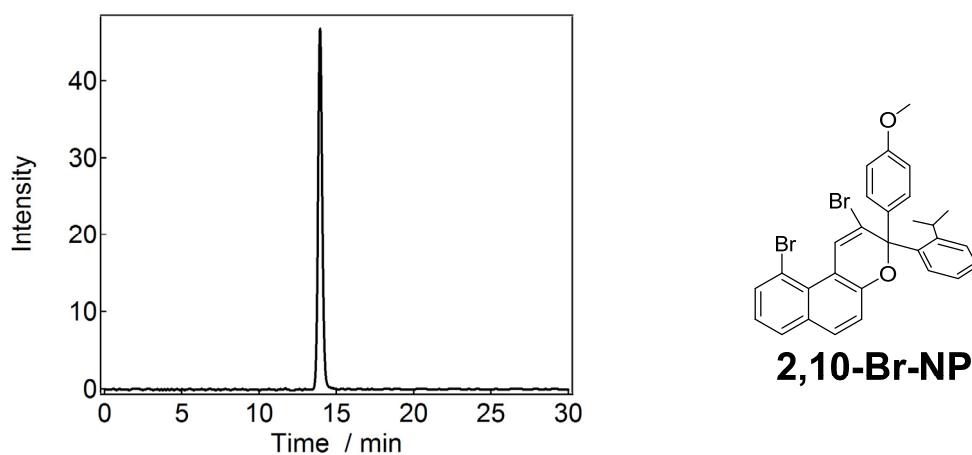

Fig. S31. HPLC chromatogram of **2,10-Br-NP**; 99% purity. HPLC analysis was performed using a reverse phase analytical column (Mightysil RP18, 25 cm × 4.6 mm, 5 μm particle) from Kanto Chemical Industries, equipped with a UV detector; the mobile phase was MeOH:H<sub>2</sub>O = 95:5 with a flow rate of 1.0 mL/min, detection wavelength; 254 nm.

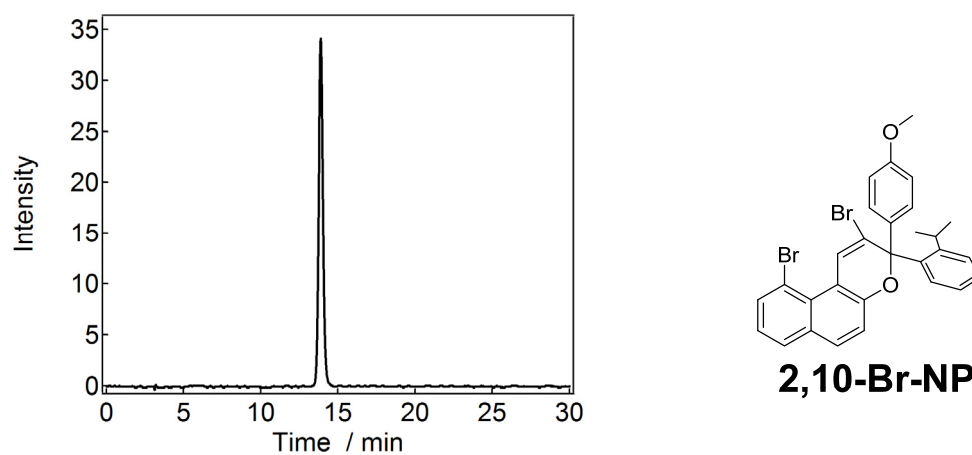

Fig. S32. HPLC chromatogram of **2,10-Br-NP**; 99% purity. HPLC analysis was performed using a reverse phase analytical column (Mightysil RP18, 25 cm × 4.6 mm, 5 μm particle) from Kanto Chemical Industries, equipped with a UV detector; the mobile phase was MeOH:H<sub>2</sub>O = 95:5 with a flow rate of 1.0 mL/min, detection wavelength; 355 nm.



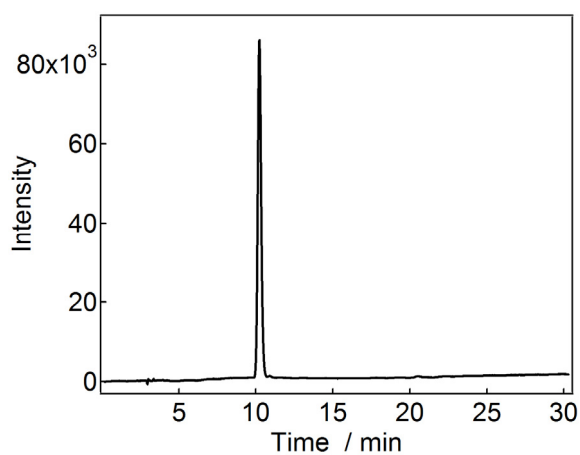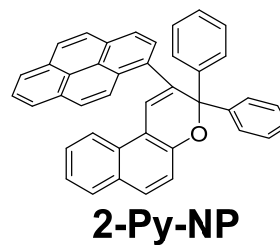

Fig. S33. HPLC chromatogram of **2-Py-NP**; 99% purity. HPLC analysis was performed using a reverse phase analytical column (Mightysil RP18, 25 cm  $\times$  4.6 mm, 5  $\mu$ m particle) from Kanto Chemical Industries, equipped with a UV detector; the mobile phase was MeOH with a flow rate of 1.0 mL/min, detection wavelength; 254 nm.

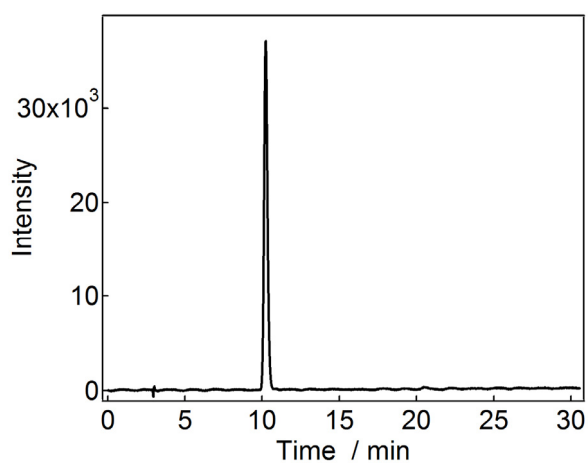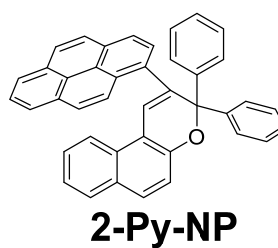

Fig. S34. HPLC chromatogram of **2-Py-NP**; 99% purity. HPLC analysis was performed using a reverse phase analytical column (Mightysil RP18, 25 cm  $\times$  4.6 mm, 5  $\mu$ m particle) from Kanto Chemical Industries, equipped with a UV detector; the mobile phase was MeOH with a flow rate of 1.0 mL/min, detection wavelength; 355 nm.

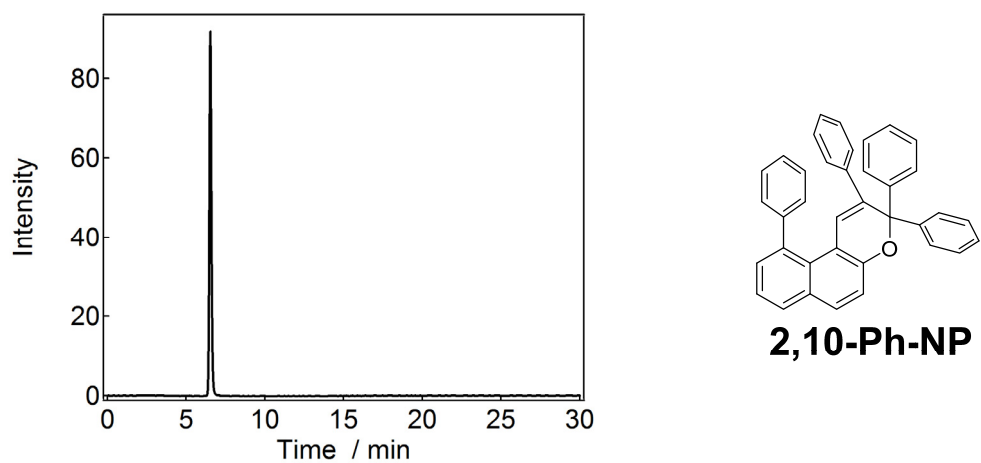

Fig. S35. HPLC chromatogram of **2,10-Ph-NP**; 99% purity. HPLC analysis was performed using a reverse phase analytical column (Mightysil RP18, 25 cm  $\times$  4.6 mm, 5  $\mu$ m particle) from Kanto Chemical Industries, equipped with a UV detector; the mobile phase was MeOH with a flow rate of 1.0 mL/min, detection wavelength; 254 nm.

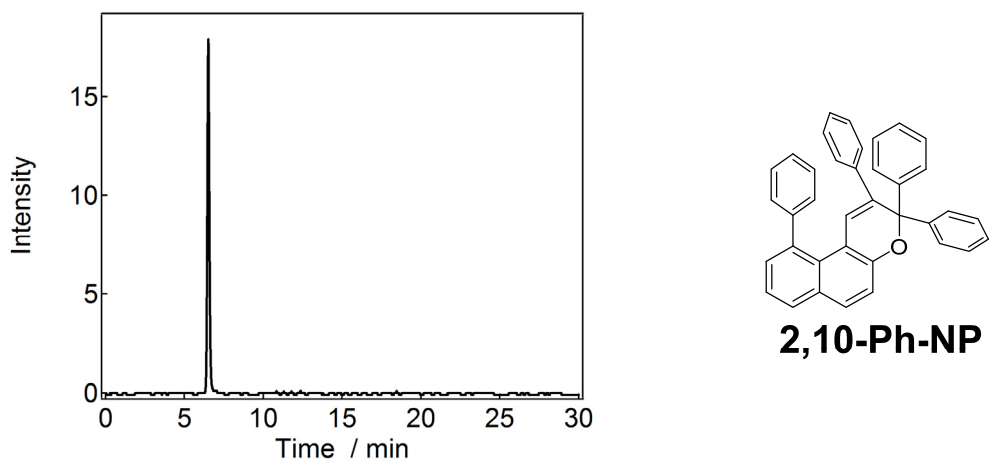

Fig. S36. HPLC chromatogram of **2,10-Ph-NP**; 99% purity. HPLC analysis was performed using a reverse phase analytical column (Mightysil RP18, 25 cm  $\times$  4.6 mm, 5  $\mu$ m particle) from Kanto Chemical Industries, equipped with a UV detector; the mobile phase was MeOH with a flow rate of 1.0 mL/min, detection wavelength; 355 nm.

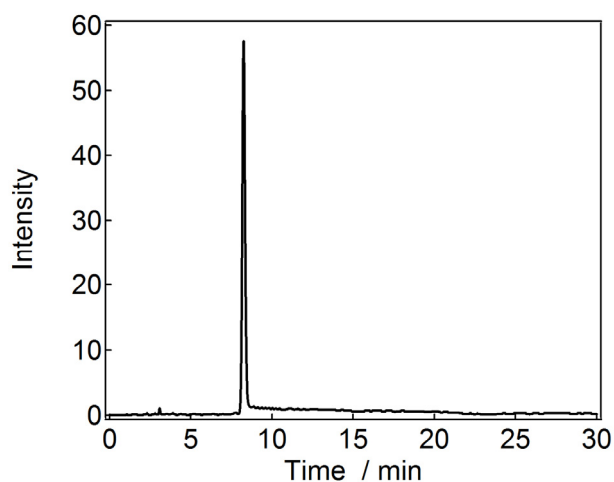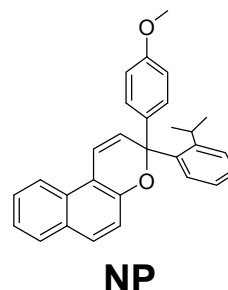

Fig. S37. HPLC chromatogram of **NP**; 99% purity. HPLC analysis was performed using a reverse phase analytical column (Mightysil RP18, 25 cm  $\times$  4.6 mm, 5  $\mu$ m particle) from Kanto Chemical Industries, equipped with a UV detector; the mobile phase was MeOH with a flow rate of 1.0 mL/min, detection wavelength; 254 nm.

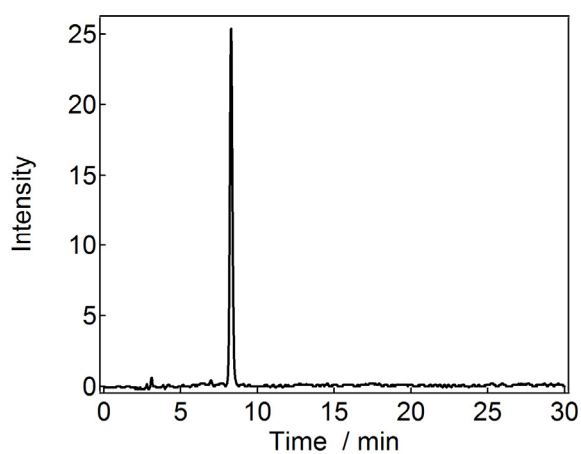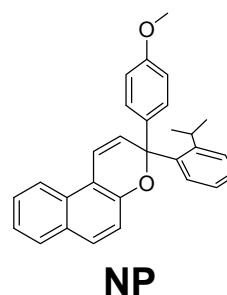

Fig. S38. HPLC chromatogram of **NP**; 99% purity. HPLC analysis was performed using a reverse phase analytical column (Mightysil RP18, 25 cm $\times$ 4.6 mm, 5  $\mu$ m particle) from Kanto Chemical Industries, equipped with a UV detector; the mobile phase was MeOH with a flow rate of 1.0 mL/min, detection wavelength; 355 nm.

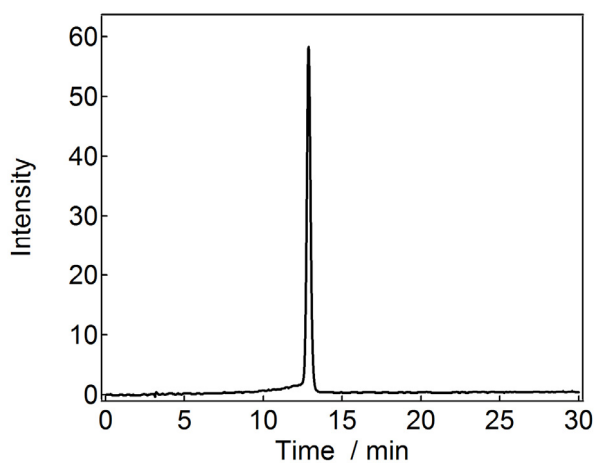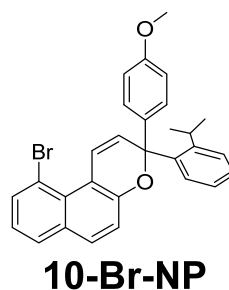

Fig. S39. HPLC chromatogram of **10-Br-NP**; 99% purity. HPLC analysis was performed using a reverse phase analytical column (Mightysil RP18, 25 cm  $\times$  4.6 mm, 5  $\mu$ m particle) from Kanto Chemical Industries, equipped with a UV detector; the mobile phase was MeOH with a flow rate of 1.0 mL/min, detection wavelength; 254 nm.

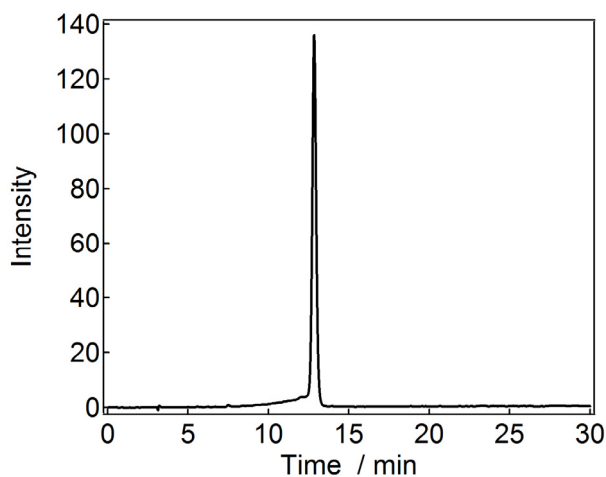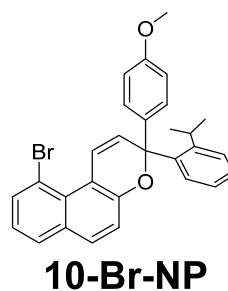

Fig. S40. HPLC chromatogram of **10-Br-NP**; 99% purity. HPLC analysis was performed using a reverse phase analytical column (Mightysil RP18, 25 cm  $\times$  4.6 mm, 5  $\mu$ m particle) from Kanto Chemical Industries, equipped with a UV detector; the mobile phase was MeOH with a flow rate of 1.0 mL/min, detection wavelength; 355 nm.

## 5. X-ray Crystallographic Analysis

The diffraction data of the single crystals were collected on the Bruker APEX II CCD area detector (Mo K $\alpha$ ,  $\lambda$  = 0.71073 nm). The data refinement was carried out by the Bruker APEXII software package with SHELXT program.<sup>S2,S3</sup> All non-hydrogen atoms were anisotropically refined.

Table S1. X-ray crystallographic data of **NP** (CCDC 1031286).

|                                   |                                                              |                         |
|-----------------------------------|--------------------------------------------------------------|-------------------------|
| Identification code               | <b>NP</b>                                                    |                         |
| Empirical formula                 | C <sub>29</sub> H <sub>26</sub> O <sub>2</sub>               |                         |
| Formula weight                    | 406.50                                                       |                         |
| Temperature                       | 90 K                                                         |                         |
| Wavelength                        | 0.71073 Å                                                    |                         |
| Crystal system                    | monoclinic                                                   |                         |
| Space group                       | P 1 21/n 1                                                   |                         |
| Unit cell dimensions              | a = 8.4797(6) Å                                              | $\alpha$ = 90°          |
|                                   | b = 16.5725(12) Å                                            | $\beta$ = 103.4540(9) ° |
|                                   | c = 15.9445(11) Å                                            | $\gamma$ = 90°          |
| Volume                            | 2179.2(3) Å <sup>3</sup>                                     |                         |
| Z                                 | 4                                                            |                         |
| Density(calculated)               | 1.239 Mg/m <sup>3</sup>                                      |                         |
| Absorption coefficient            | 0.076 mm <sup>-1</sup>                                       |                         |
| F(000)                            | 864                                                          |                         |
| Theta range for data collection   | 1.80 to 26.30°                                               |                         |
| Index ranges                      | -10<= <i>h</i> <=6, -20<= <i>k</i> <=20, -19<= <i>l</i> <=19 |                         |
| Reflections collected             | 11304                                                        |                         |
| Independent reflections           | 4419 [R(int) = 0.0155]                                       |                         |
| Absorption correction             | Empirical                                                    |                         |
| Refinement method                 | Full-matrix least-squares on F <sup>2</sup>                  |                         |
| Data / restraints / parameters    | 4419 / 0 / 283                                               |                         |
| Goodness-of-fit on F <sup>2</sup> | 1.024                                                        |                         |
| Final R indices [I>sigma(I)]      | R1 = 0.0366, wR2 = 0.0887                                    |                         |
| R indices (all data)              | R1 = 0.0430, wR2 = 0.0937                                    |                         |
| Largest diff. peak and hole       | 0.275 and -0.211 e Å <sup>-3</sup>                           |                         |

Table S2. X-ray crystallographic data of **10-Br-NP** (CCDC 1031285).

|                                   |                                                             |                            |  |
|-----------------------------------|-------------------------------------------------------------|----------------------------|--|
| Identification code               | <b>10-Br-NP</b>                                             |                            |  |
| Empirical formula                 | $C_{29}H_{25}BrO_2$                                         |                            |  |
| Formula weight                    | 485.40                                                      |                            |  |
| Temperature                       | 90 K                                                        |                            |  |
| Wavelength                        | 0.71073 Å                                                   |                            |  |
| Crystal system                    | monoclinic                                                  |                            |  |
| Space group                       | P 1 21/c 1                                                  |                            |  |
| Unit cell dimensions              | $a = 8.4457(4)$ Å                                           | $\alpha = 90^\circ$        |  |
|                                   | $b = 15.2032(7)$ Å                                          | $\beta = 92.8463(6)^\circ$ |  |
|                                   | $c = 17.4327(8)$ Å                                          | $\gamma = 90^\circ$        |  |
| Volume                            | 2235.63 Å <sup>3</sup>                                      |                            |  |
| Z                                 | 4                                                           |                            |  |
| Density(calculated)               | 1.442 Mg/m <sup>3</sup>                                     |                            |  |
| Absorption coefficient            | 0.0863 mm <sup>-1</sup>                                     |                            |  |
| F(000)                            | 1000                                                        |                            |  |
| Theta range for data collection   | 1.78 to 26.38°                                              |                            |  |
| Index ranges                      | $-10 \leq h \leq 8, -18 \leq k \leq 19, -20 \leq l \leq 21$ |                            |  |
| Reflections collected             | 11698                                                       |                            |  |
| Independent reflections           | 4568 [R(int) = 0.0139]                                      |                            |  |
| Absorption correction             | Empirical                                                   |                            |  |
| Refinement method                 | Full-matrix least-squares on F <sup>2</sup>                 |                            |  |
| Data / restraints / parameters    | 4568 / 0 / 292                                              |                            |  |
| Goodness-of-fit on F <sup>2</sup> | 1.063                                                       |                            |  |
| Final R indices [I>sigma (I)]     | R1 = 0.0234, wR2 = 0.0608                                   |                            |  |
| R indices (all data)              | R1 = 0.0256, wR2 = 0.0619                                   |                            |  |
| Largest diff. peak and hole       | 0.390 and -0.519 e Å <sup>-3</sup>                          |                            |  |

Table S3. X-ray crystallographic data of **2-Br-NP** (CCDC 1031283).

|                                   |                                                             |                            |
|-----------------------------------|-------------------------------------------------------------|----------------------------|
| Identification code               | <b>2-Br-NP</b>                                              |                            |
| Empirical formula                 | $C_{29}H_{25}Br_2O_2$                                       |                            |
| Formula weight                    | 485.40                                                      |                            |
| Temperature                       | 90 K                                                        |                            |
| Wavelength                        | 0.71073 Å                                                   |                            |
| Crystal system                    | Monoclinic                                                  |                            |
| Space group                       | P 1 21/n 1                                                  |                            |
| Unit cell dimensions              | $a = 8.4379(3)$ Å                                           | $\alpha = 90^\circ$        |
|                                   | $b = 16.1157(6)$ Å                                          | $\beta = 101.440(5)^\circ$ |
|                                   | $c = 16.8070(6)$ Å                                          | $\gamma = 90^\circ$        |
| Volume                            | $2240.06(14)$ Å <sup>3</sup>                                |                            |
| Z                                 | 4                                                           |                            |
| Density(calculated)               | 1.439 Mg/m <sup>3</sup>                                     |                            |
| Absorption coefficient            | 1.860 mm <sup>-1</sup>                                      |                            |
| F(000)                            | 1000                                                        |                            |
| Theta range for data collection   | 1.77 to 26.04°                                              |                            |
| Index ranges                      | $-10 \leq h \leq 9, -19 \leq k \leq 19, -20 \leq l \leq 17$ |                            |
| Reflections collected             | 11385                                                       |                            |
| Independent reflections           | 4403 [R(int) = 0.0134]                                      |                            |
| Absorption correction             | Empirical                                                   |                            |
| Refinement method                 | Full-matrix least-squares on F <sup>2</sup>                 |                            |
| Data / restraints / parameters    | 4403 / 0 / 292                                              |                            |
| Goodness-of-fit on F <sup>2</sup> | 1.047                                                       |                            |
| Final R indices [I>sigma (I)]     | R1 = 0.0227, wR2 = 0.0589                                   |                            |
| R indices (all data)              | R1 = 0.0258, wR2 = 0.0601                                   |                            |
| Largest diff. peak and hole       | 0.366 and -0.316 eÅ <sup>-3</sup>                           |                            |

Table S4. X-ray crystallographic data of **2,10-Br-NP** (CCDC 1031281).

|                                   |                                                             |                            |
|-----------------------------------|-------------------------------------------------------------|----------------------------|
| Identification code               | <b>2,10-Br-NP</b>                                           |                            |
| Empirical formula                 | $C_{29}H_{24}Br_2O_2$                                       |                            |
| Formula weight                    | 564.30                                                      |                            |
| Temperature                       | 90 K                                                        |                            |
| Wavelength                        | 0.71073 Å                                                   |                            |
| Crystal system                    | triclinic                                                   |                            |
| Space group                       | P-1                                                         |                            |
| Unit cell dimensions              | $a = 8.9872(17)$ Å                                          | $\alpha = 79.651(2)^\circ$ |
|                                   | $b = 9.0894(17)$ Å                                          | $\beta = 77.966(2)^\circ$  |
|                                   | $c = 15.463(3)$ Å                                           | $\gamma = 77.931(2)^\circ$ |
| Volume                            | $1195.8(4)$ Å <sup>3</sup>                                  |                            |
| Z                                 | 2                                                           |                            |
| Density(calculated)               | 1.567 Mg/m <sup>3</sup>                                     |                            |
| Absorption coefficient            | 3.414 mm <sup>-1</sup>                                      |                            |
| F(000)                            | 568                                                         |                            |
| Theta range for data collection   | 1.36 to 26.34°                                              |                            |
| Index ranges                      | $-11 \leq h \leq 9, -11 \leq k \leq 11, -19 \leq l \leq 15$ |                            |
| Reflections collected             | 6211                                                        |                            |
| Independent reflections           | 4637 [R(int) = 0.0159]                                      |                            |
| Absorption correction             | Empirical                                                   |                            |
| Refinement method                 | Full-matrix least-squares on F <sup>2</sup>                 |                            |
| Data / restraints / parameters    | 4637 / 0 / 301                                              |                            |
| Goodness-of-fit on F <sup>2</sup> | 1.088                                                       |                            |
| Final R indices [I>sigma (I)]     | R1 = 0.0440, wR2 = 0.1332                                   |                            |
| R indices (all data)              | R1 = 0.0477, wR2 = 0.1351                                   |                            |
| Largest diff. peak and hole       | 1.876 and -0.515 e Å <sup>-3</sup>                          |                            |



Table S5. X-ray crystallographic data of **2,10-Ph-NP** (CCDC 1031282).

|                                   |                                                                   |                             |
|-----------------------------------|-------------------------------------------------------------------|-----------------------------|
| Identification code               | <b>2,10-Ph-NP</b>                                                 |                             |
| Empirical formula                 | $C_{37}H_{26}O$                                                   |                             |
| Formula weight                    | 486.58                                                            |                             |
| Temperature                       | 90 K                                                              |                             |
| Wavelength                        | 0.71073 Å                                                         |                             |
| Crystal system                    | triclinic                                                         |                             |
| Space group                       | P-1                                                               |                             |
| Unit cell dimensions              | $a = 9.9865(6)$ Å                                                 | $\alpha = 86.2498(7)^\circ$ |
|                                   | $b = 10.5600(7)$ Å                                                | $\beta = 84.3378(7)^\circ$  |
|                                   | $c = 13.7281(8)$ Å                                                | $\gamma = 64.1270(5)^\circ$ |
| Volume                            | $1295.86(14)$ Å <sup>3</sup>                                      |                             |
| Z                                 | 2                                                                 |                             |
| Density(calculated)               | $1.247$ Mg/m <sup>3</sup>                                         |                             |
| Absorption coefficient            | $0.073$ mm <sup>-1</sup>                                          |                             |
| F(000)                            | 512                                                               |                             |
| Theta range for data collection   | 1.49 to 25.32°                                                    |                             |
| Index ranges                      | $-12 \leq h \leq 8$ , $-12 \leq k \leq 12$ , $-16 \leq l \leq 15$ |                             |
| Reflections collected             | 6396                                                              |                             |
| Independent reflections           | 4641 [R(int) = 0.0094]                                            |                             |
| Absorption correction             | Empirical                                                         |                             |
| Refinement method                 | Full-matrix least-squares on F <sup>2</sup>                       |                             |
| Data / restraints / parameters    | 4641 / 0 / 343                                                    |                             |
| Goodness-of-fit on F <sup>2</sup> | 1.001                                                             |                             |
| Final R indices [I>sigma(I)]      | R1 = 0.0343, wR2 = 0.0807                                         |                             |
| R indices (all data)              | R1 = 0.0399, wR2 = 0.0845                                         |                             |
| Largest diff. peak and hole       | 0.232 and -0.205 e Å <sup>-3</sup>                                |                             |

Table S6. X-ray crystallographic data of **2-Py-NP** (CCDC 1031284).

|                                   |                                             |                             |
|-----------------------------------|---------------------------------------------|-----------------------------|
| Identification code               | <b>2-Py-NP</b>                              |                             |
| Empirical formula                 | C <sub>41</sub> H <sub>26</sub> O           |                             |
| Formula weight                    | 534.62                                      |                             |
| Temperature                       | 90 K                                        |                             |
| Wavelength                        | 0.71073 Å                                   |                             |
| Crystal system                    | monoclinic                                  |                             |
| Space group                       | C 1 2/c 1                                   |                             |
| Unit cell dimensions              | a = 41.059(2) Å                             | $\alpha = 90^\circ$         |
|                                   | b = 10.4431(6) Å                            | $\beta = 98.5570(10)^\circ$ |
|                                   | c = 13.0847(8) Å                            | $\gamma = 90^\circ$         |
| Volume                            | 5548.0(6) Å <sup>3</sup>                    |                             |
| Z                                 | 8                                           |                             |
| Density(calculated)               | 1.280 Mg/m <sup>3</sup>                     |                             |
| Absorption coefficient            | 0.075 mm <sup>-1</sup>                      |                             |
| F(000)                            | 2240                                        |                             |
| Theta range for data collection   | 2.01 to 24.71°                              |                             |
| Index ranges                      | -42 ≤ h ≤ 48, -12 ≤ k ≤ 9, -15 ≤ l ≤ 14     |                             |
| Reflections collected             | 12608                                       |                             |
| Independent reflections           | 4734 [R(int) = 0.0153]                      |                             |
| Absorption correction             | Empirical                                   |                             |
| Refinement method                 | Full-matrix least-squares on F <sup>2</sup> |                             |
| Data / restraints / parameters    | 4734 / 0 / 379                              |                             |
| Goodness-of-fit on F <sup>2</sup> | 0.954                                       |                             |
| Final R indices [I > sigma (I)]   | R1 = 0.0323, wR2 = 0.1084                   |                             |
| R indices (all data)              | R1 = 0.0387, wR2 = 0.1173                   |                             |
| Largest diff. peak and hole       | 0.194 and -0.183 e Å <sup>-3</sup>          |                             |

## 6. UV–Vis Absorption Spectroscopy

The steady state UV–vis absorption spectra were recorded with a Shimadzu UV3150 spectrometer.

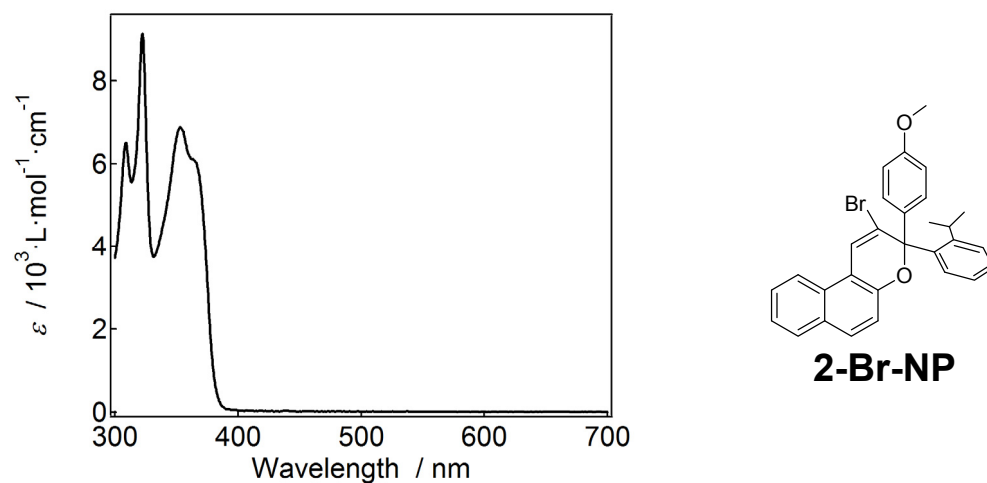

Fig. S41. UV–vis absorption spectrum of **2-Br-NP** in benzene at 298 K.

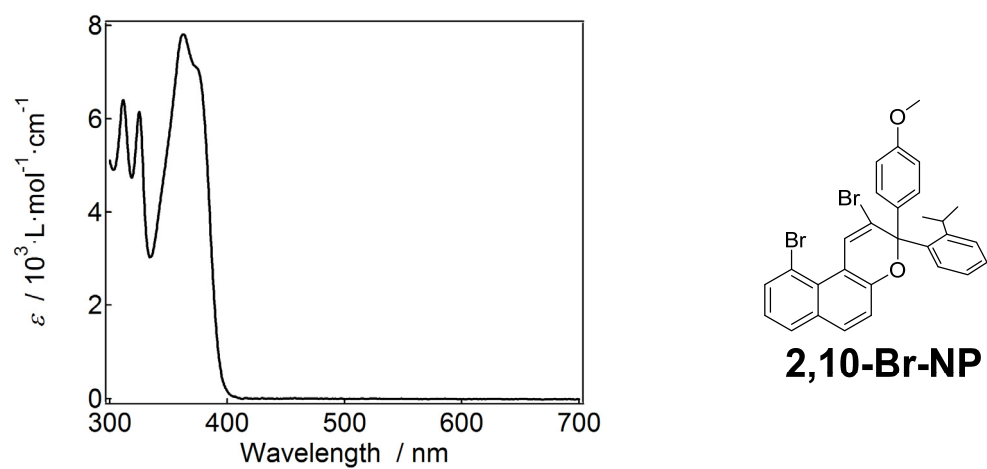

Fig. S42. UV–vis absorption spectrum of **2,10-Br-NP** in benzene at 298 K.

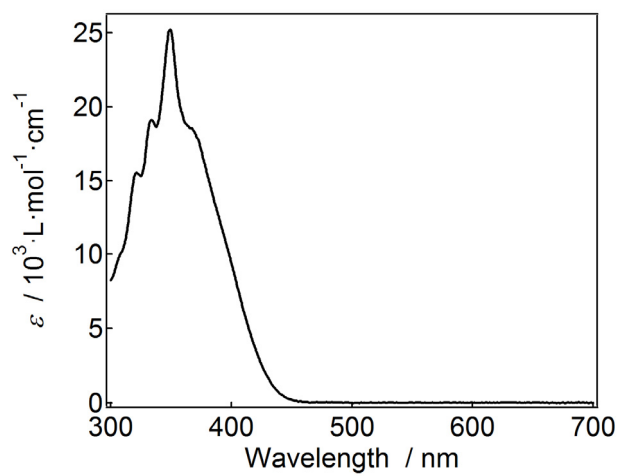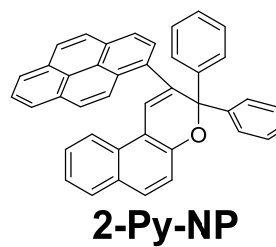

Fig. S43. UV-vis absorption spectrum of **2-Py-NP** in benzene at 298 K.

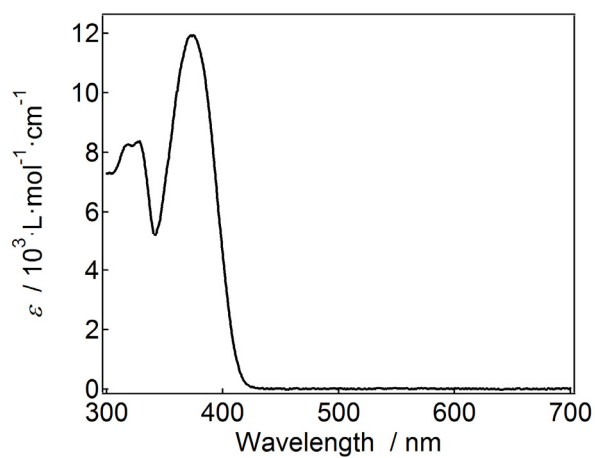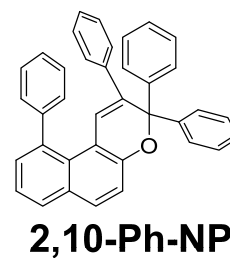

Fig. S44. UV-vis absorption spectrum of **2,10-Ph-NP** in benzene at 298 K.

## 7. Kinetics for the Thermal Back Reaction

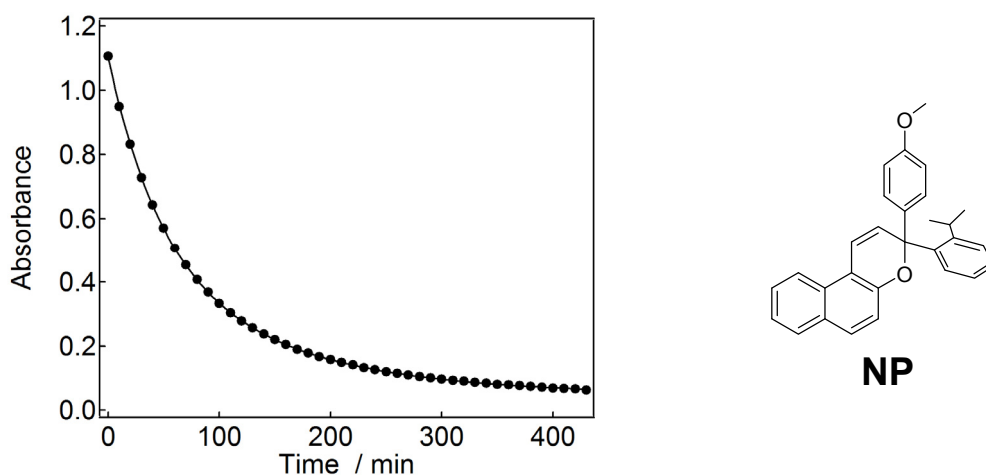

Fig. S45. Decay profiles of the transient absorbance of the solution of **NP** ( $4.9 \times 10^{-5}$  M) observed at 460 nm in benzene at room temperature after irradiation of CW UV light (excitation wavelength, 365 nm; power, 2.6 W/cm<sup>2</sup>). The solid line indicates the fitted curve by a double exponential decay function.

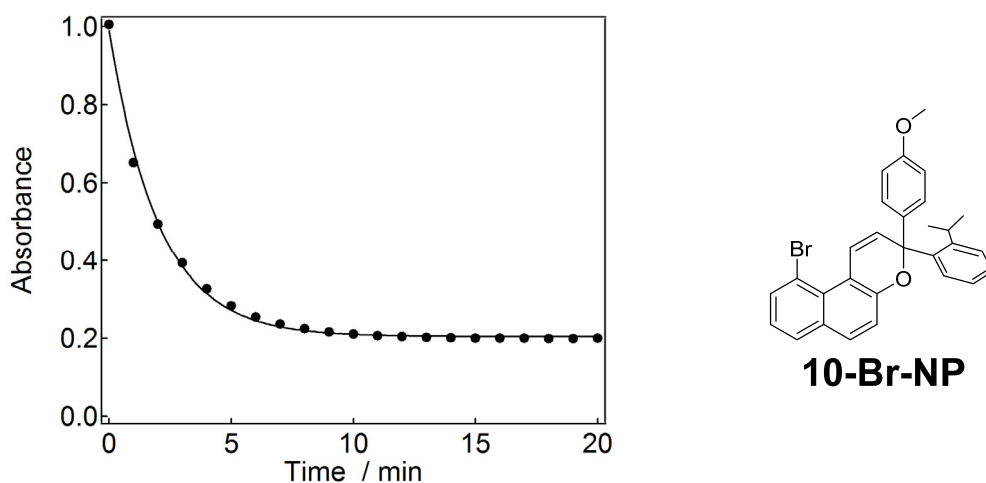

Fig. S46. Decay profiles of the transient absorbance of the solution of **10-Br-NP** ( $5.7 \times 10^{-5}$  M) observed at 450 nm in benzene at room temperature after irradiation of CW UV light (excitation wavelength, 365 nm; power, 2.6 W/cm<sup>2</sup>). The solid line indicates the fitted curve by a double exponential decay function.

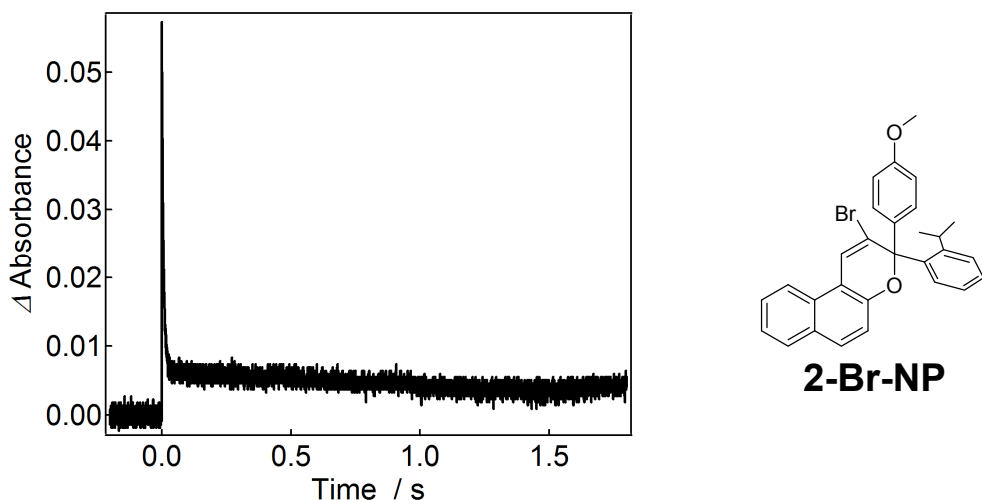

Fig. S47. Transient absorption dynamics of **2-Br-NP** in benzene ( $1.0 \times 10^{-4}$  M) excited at 355 nm after repetitive exposures of ns laser pulses (excitation wavelength, 355 nm; pulse duration, 5 ns; power 4 mJ/pulse). The decays were monitored at 400 nm and performed at room temperature.

## 8. Fatigue Resistance

The fatigue resistances of **2,10-Br-NP**, **2,10-Ph-NP** and **2-Py-NP** were measured using a Q-switch Nd:YAG laser (Continuum Minilite II) with the third harmonic at 355 nm (ca. 5 mJ per 5 ns pulse) as the excitation beam.

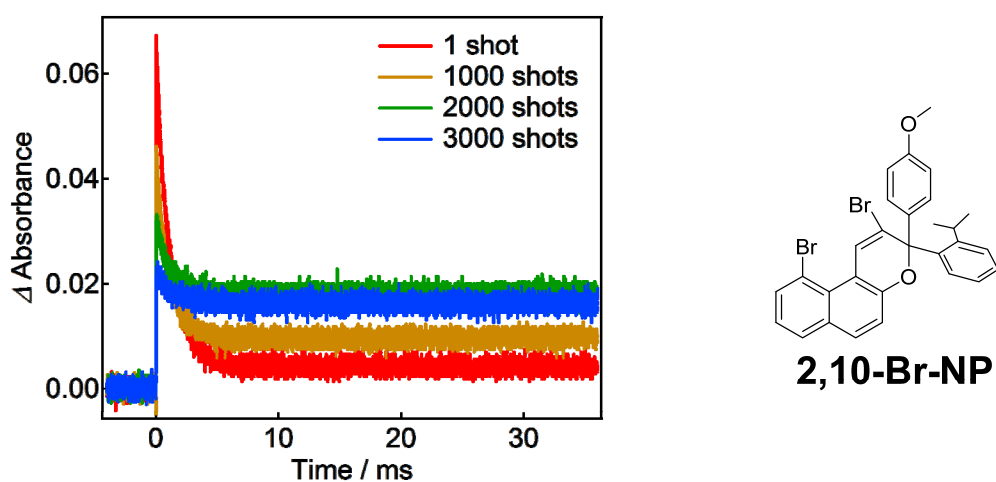

Fig. S48. Transient absorption dynamics of **2,10-Br-NP** in benzene ( $4.3 \times 10^{-5}$  M) excited at 355 nm after repetitive exposures of ns laser pulses (excitation wavelength, 355 nm; pulse duration, 5 ns; power 5 mJ/pulse). The decays were monitored at 400 nm and performed at room temperature.

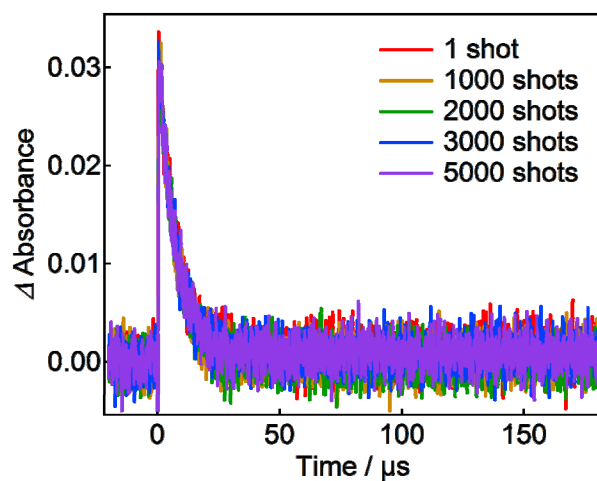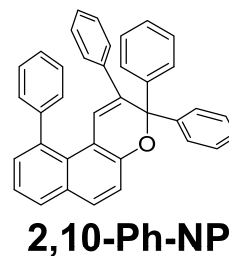

Fig. S49. Transient absorption dynamics of **2,10-Ph-NP** in benzene ( $3.9 \times 10^{-5}$  M) excited at 355 nm after repetitive exposures of ns laser pulses (excitation wavelength, 355 nm; pulse duration, 5 ns; power 5 mJ/pulse). The decays were monitored at 450 nm and performed at room temperature.

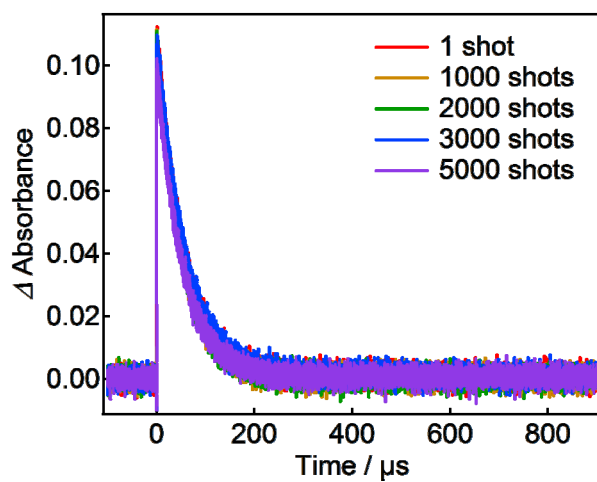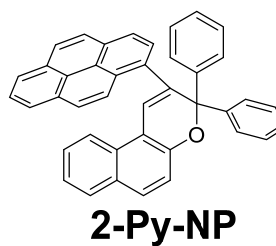

Fig. S50. Transient absorption dynamics of **2-Py-NP** in benzene ( $4.6 \times 10^{-5}$  M) excited at 355 nm after repetitive exposures of ns laser pulses (excitation wavelength, 355 nm; pulse duration, 5 ns; power 5 mJ/pulse). The decays were monitored at 450 nm and performed at room temperature.

## 9. Transient Absorption Dynamics in Polymer Matrices

Transient absorption dynamics of **2-Br-NP**, **2,10-Br-NP**, **2,10-Ph-NP** and **2-Py-NP** in polymer matrix were measured using a Q-switch Nd:YAG laser (Continuum Minilite II) with the third harmonic at 355 nm (ca. 4 mJ per 5 ns pulse) as the excitation beam. Polymethylmethacrylate (PMMA) and polybutylacrylate (PBA) block copolymer was used as a host polymer ( $M_n$ :  $7.51 \times 10^4$  g/mol,  $M_w/M_n$ : 1.09, glass transition temperature ( $T_g$ ):  $-42$  and  $127$  °C, and PMMA: PBA = 5 : 9).

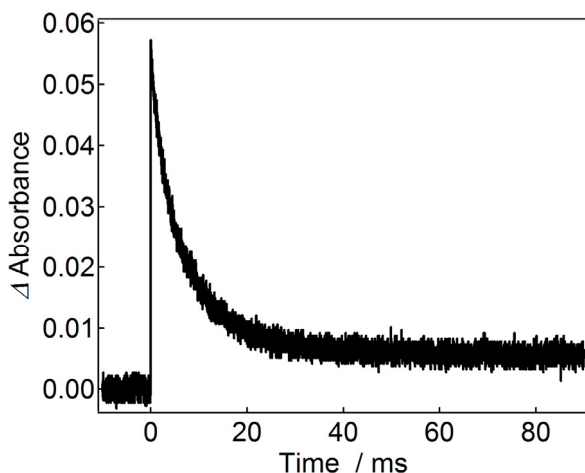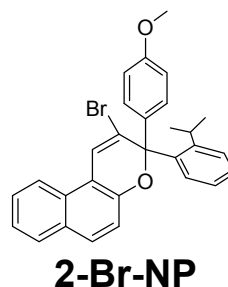

Fig. S51. Transient absorption dynamics of **2-Br-NP** in polymer matrix (19 wt. %, film thickness: 216  $\mu\text{m}$ ) excited at 355 nm after repetitive exposures of ns laser pulses (excitation wavelength, 355 nm; pulse duration, 5 ns; power 4 mJ/pulse). The decays were monitored at 400 nm and performed at room temperature.

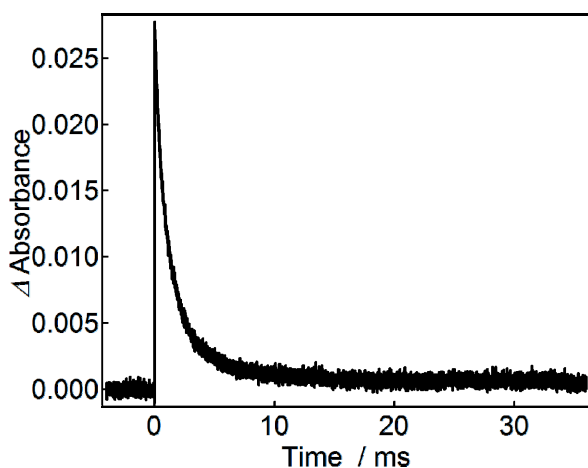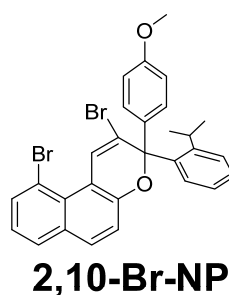

Fig. S52. Transient absorption dynamics of **2,10-Br-NP** in polymer matrix (26 wt. %, film thickness: 177  $\mu\text{m}$ ) excited at 355 nm after repetitive exposures of ns laser pulses (excitation wavelength, 355 nm; pulse duration, 5 ns; power 4 mJ/pulse). The decays were monitored at 400 nm and performed at room temperature.



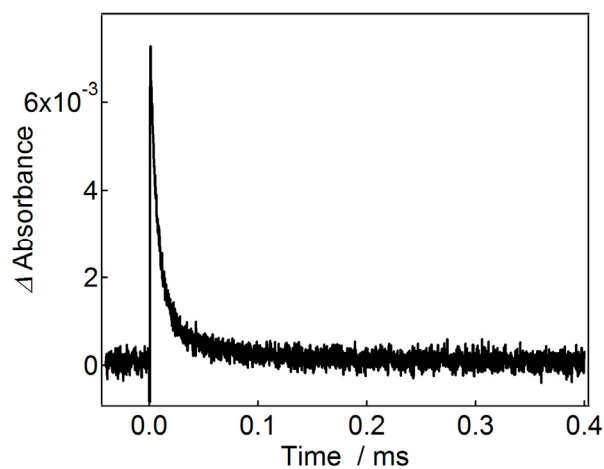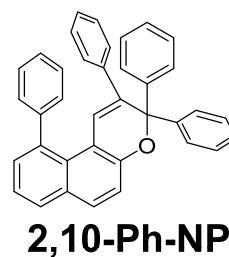

Fig. S53. Transient absorption dynamics of **2,10-Ph-NP** in polymer matrix (11 wt. %, film thickness: 173  $\mu\text{m}$ ) excited at 355 nm after repetitive exposures of ns laser pulses (excitation wavelength, 355 nm; pulse duration, 5 ns; power 4 mJ/pulse). The decays were monitored at 450 nm and performed at room temperature.

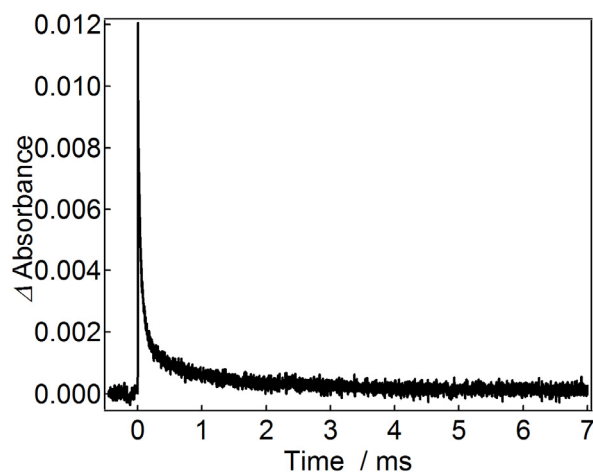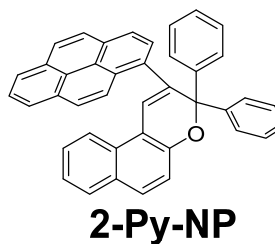

Fig. S54. Transient absorption dynamics of **2-Py-NP** in polymer matrix (14 wt. %, film thickness: 180  $\mu\text{m}$ ) excited at 355 nm after repetitive exposures of ns laser pulses (excitation wavelength, 355 nm; pulse duration, 5 ns; power 4 mJ/pulse). The decays were monitored at 450 nm and performed at room temperature.

## 10. Experimental Detail for Laser Flash Photolysis Measurements

The laser flash photolysis experiments were carried out with a TSP-1000 time resolved spectrophotometer (Unisoku). A 10 Hz Q-switched Nd:YAG (Continuum Minilite II) laser with the third harmonic at 355 nm (ca. 7 mJ per 5 ns pulse) was employed for the excitation light. The probe beam from a halogen lamp (OSRAM HLX64623) was guided with an optical fiber scope to be arranged in an orientation perpendicular to the exciting laser beam. The probe beam was monitored with a photomultiplier tube (Hamamatsu R2949) through a spectrometer (Unisoku MD200) for the decay profile of the colored species and with multi-channel spectrophotometer (Unisoku MSP-1000-V1) for the transient absorption spectroscopy.

## 11. DFT Calculations

All calculations were carried out using the Gaussian 09 program (Revision D.01)<sup>S4</sup>. The molecular structures were fully optimized at the CAM-B3LYP/6-31G(d) level of theory, and analytical second derivatives of the energy were calculated using vibrational analysis to confirm each stationary point to be a minimum, to determine the harmonic vibrational frequencies, and to provide zero-point vibrational energy corrections. Calculations have been carried out in the gas phase.

**NP: *transoid-trans* (TT)**

|                                              |                             |          |              |
|----------------------------------------------|-----------------------------|----------|--------------|
| Temperature                                  | 298.150 Kelvin.             | Pressure | 1.00000 Atm. |
| Zero-point correction=                       | 0.477108 (Hartree/Particle) |          |              |
| Thermal correction to Energy=                | 0.504106                    |          |              |
| Thermal correction to Enthalpy=              | 0.505050                    |          |              |
| Thermal correction to Gibbs Free Energy=     | 0.416704                    |          |              |
| Sum of electronic and zero-point Energies=   | - 1269.979274               |          |              |
| Sum of electronic and thermal Energies=      | - 1269.952276               |          |              |
| Sum of electronic and thermal Enthalpies=    | - 1269.951332               |          |              |
| Sum of electronic and thermal Free Energies= | - 1270.039677               |          |              |

**NP: *transoid-cis* (TC)**

|                                 |                             |          |              |
|---------------------------------|-----------------------------|----------|--------------|
| Temperature                     | 298.150 Kelvin.             | Pressure | 1.00000 Atm. |
| Zero-point correction=          | 0.477092 (Hartree/Particle) |          |              |
| Thermal correction to Energy=   | 0.504122                    |          |              |
| Thermal correction to Enthalpy= | 0.505066                    |          |              |

|                                              |               |
|----------------------------------------------|---------------|
| Thermal correction to Gibbs Free Energy=     | 0.417151      |
| Sum of electronic and zero-point Energies=   | – 1269.983856 |
| Sum of electronic and thermal Energies=      | – 1269.956826 |
| Sum of electronic and thermal Enthalpies=    | – 1269.955882 |
| Sum of electronic and thermal Free Energies= | – 1270.043797 |

**NP: *cisoid-cis* (CC)**

|                                              |                             |          |              |
|----------------------------------------------|-----------------------------|----------|--------------|
| Temperature                                  | 298.150 Kelvin.             | Pressure | 1.00000 Atm. |
| Zero-point correction=                       | 0.476818 (Hartree/Particle) |          |              |
| Thermal correction to Energy=                | 0.503521                    |          |              |
| Thermal correction to Enthalpy=              | 0.504465                    |          |              |
| Thermal correction to Gibbs Free Energy=     | 0.419013                    |          |              |
| Sum of electronic and zero-point Energies=   | – 1269.968995               |          |              |
| Sum of electronic and thermal Energies=      | – 1269.942292               |          |              |
| Sum of electronic and thermal Enthalpies=    | – 1269.941347               |          |              |
| Sum of electronic and thermal Free Energies= | – 1270.026799               |          |              |

**NP: *closed form* (CF)**

|                                              |                             |          |              |
|----------------------------------------------|-----------------------------|----------|--------------|
| Temperature                                  | 298.150 Kelvin.             | Pressure | 1.00000 Atm. |
| Zero-point correction=                       | 0.478677 (Hartree/Particle) |          |              |
| Thermal correction to Energy=                | 0.504356                    |          |              |
| Thermal correction to Enthalpy=              | 0.505300                    |          |              |
| Thermal correction to Gibbs Free Energy=     | 0.422778                    |          |              |
| Sum of electronic and zero-point Energies=   | – 1269.996062               |          |              |
| Sum of electronic and thermal Energies=      | – 1269.970382               |          |              |
| Sum of electronic and thermal Enthalpies=    | – 1269.969438               |          |              |
| Sum of electronic and thermal Free Energies= | – 1270.051961               |          |              |

**10-Br-NP: *transoid-trans* (TT)**

|                                            |                             |          |              |
|--------------------------------------------|-----------------------------|----------|--------------|
| Temperature                                | 298.150 Kelvin.             | Pressure | 1.00000 Atm. |
| Zero-point correction=                     | 0.466872 (Hartree/Particle) |          |              |
| Thermal correction to Energy=              | 0.495271                    |          |              |
| Thermal correction to Enthalpy=            | 0.496215                    |          |              |
| Thermal correction to Gibbs Free Energy=   | 0.405483                    |          |              |
| Sum of electronic and zero-point Energies= | – 3841.189814               |          |              |
| Sum of electronic and thermal Energies=    | – 3841.161415               |          |              |

|                                              |               |
|----------------------------------------------|---------------|
| Sum of electronic and thermal Enthalpies=    | – 3841.160471 |
| Sum of electronic and thermal Free Energies= | – 3841.251203 |

**10-Br-NP: *transoid-cis* (TC)**

|                                              |                             |          |              |
|----------------------------------------------|-----------------------------|----------|--------------|
| Temperature                                  | 298.150 Kelvin.             | Pressure | 1.00000 Atm. |
| Zero-point correction=                       | 0.466852 (Hartree/Particle) |          |              |
| Thermal correction to Energy=                | 0.495288                    |          |              |
| Thermal correction to Enthalpy=              | 0.496232                    |          |              |
| Thermal correction to Gibbs Free Energy=     | 0.404576                    |          |              |
| Sum of electronic and zero-point Energies=   | – 3841.190439               |          |              |
| Sum of electronic and thermal Energies=      | – 3841.162003               |          |              |
| Sum of electronic and thermal Enthalpies=    | – 3841.161059               |          |              |
| Sum of electronic and thermal Free Energies= | – 3841.252715               |          |              |

**10-Br-NP: *cisoid-cis* (CC)**

|                                              |                             |          |              |
|----------------------------------------------|-----------------------------|----------|--------------|
| Temperature                                  | 298.150 Kelvin.             | Pressure | 1.00000 Atm. |
| Zero-point correction=                       | 0.466641 (Hartree/Particle) |          |              |
| Thermal correction to Energy=                | 0.494791                    |          |              |
| Thermal correction to Enthalpy=              | 0.495735                    |          |              |
| Thermal correction to Gibbs Free Energy=     | 0.406314                    |          |              |
| Sum of electronic and zero-point Energies=   | – 3841.177444               |          |              |
| Sum of electronic and thermal Energies=      | – 3841.149294               |          |              |
| Sum of electronic and thermal Enthalpies=    | – 3841.148349               |          |              |
| Sum of electronic and thermal Free Energies= | – 3841.237770               |          |              |

**10-Br-NP: *closed form* (CF)**

|                                              |                             |          |              |
|----------------------------------------------|-----------------------------|----------|--------------|
| Temperature                                  | 298.150 Kelvin.             | Pressure | 1.00000 Atm. |
| Zero-point correction=                       | 0.468624 (Hartree/Particle) |          |              |
| Thermal correction to Energy=                | 0.495768                    |          |              |
| Thermal correction to Enthalpy=              | 0.496712                    |          |              |
| Thermal correction to Gibbs Free Energy=     | 0.409847                    |          |              |
| Sum of electronic and zero-point Energies=   | – 3841.202251               |          |              |
| Sum of electronic and thermal Energies=      | – 3841.175107               |          |              |
| Sum of electronic and thermal Enthalpies=    | – 3841.174163               |          |              |
| Sum of electronic and thermal Free Energies= | – 3841.261028               |          |              |

**2-Br-NP: *transoid-trans* (TT)**

|                                              |                             |          |              |
|----------------------------------------------|-----------------------------|----------|--------------|
| Temperature                                  | 298.150 Kelvin.             | Pressure | 1.00000 Atm. |
| Zero-point correction=                       | 0.466349 (Hartree/Particle) |          |              |
| Thermal correction to Energy=                | 0.494802                    |          |              |
| Thermal correction to Enthalpy=              | 0.495746                    |          |              |
| Thermal correction to Gibbs Free Energy=     | 0.404752                    |          |              |
| Sum of electronic and zero-point Energies=   | - 3841.185972               |          |              |
| Sum of electronic and thermal Energies=      | - 3841.157519               |          |              |
| Sum of electronic and thermal Enthalpies=    | - 3841.156574               |          |              |
| Sum of electronic and thermal Free Energies= | - 3841.247569               |          |              |

**2-Br-NP: *transoid-cis* (TC)**

|                                              |                             |          |              |
|----------------------------------------------|-----------------------------|----------|--------------|
| Temperature                                  | 298.150 Kelvin.             | Pressure | 1.00000 Atm. |
| Zero-point correction=                       | 0.466002 (Hartree/Particle) |          |              |
| Thermal correction to Energy=                | 0.494659                    |          |              |
| Thermal correction to Enthalpy=              | 0.495603                    |          |              |
| Thermal correction to Gibbs Free Energy=     | 0.403579                    |          |              |
| Sum of electronic and zero-point Energies=   | - 3841.185282               |          |              |
| Sum of electronic and thermal Energies=      | - 3841.156626               |          |              |
| Sum of electronic and thermal Enthalpies=    | - 3841.155681               |          |              |
| Sum of electronic and thermal Free Energies= | - 3841.247705               |          |              |

**2-Br-NP: *cisoid-cis* (CC)**

|                                              |                             |          |              |
|----------------------------------------------|-----------------------------|----------|--------------|
| Temperature                                  | 298.150 Kelvin.             | Pressure | 1.00000 Atm. |
| Zero-point correction=                       | 0.466108 (Hartree/Particle) |          |              |
| Thermal correction to Energy=                | 0.494643                    |          |              |
| Thermal correction to Enthalpy=              | 0.495587                    |          |              |
| Thermal correction to Gibbs Free Energy=     | 0.404818                    |          |              |
| Sum of electronic and zero-point Energies=   | - 3841.182806               |          |              |
| Sum of electronic and thermal Energies=      | - 3841.154271               |          |              |
| Sum of electronic and thermal Enthalpies=    | - 3841.153327               |          |              |
| Sum of electronic and thermal Free Energies= | - 3841.244096               |          |              |

**2-Br-NP: *closed form* (CF)**

|                        |                             |          |              |
|------------------------|-----------------------------|----------|--------------|
| Temperature            | 298.150 Kelvin.             | Pressure | 1.00000 Atm. |
| Zero-point correction= | 0.468698 (Hartree/Particle) |          |              |

|                                              |               |
|----------------------------------------------|---------------|
| Thermal correction to Energy=                | 0.495853      |
| Thermal correction to Enthalpy=              | 0.496798      |
| Thermal correction to Gibbs Free Energy=     | 0.410763      |
| Sum of electronic and zero-point Energies=   | – 3841.210306 |
| Sum of electronic and thermal Energies=      | – 3841.183151 |
| Sum of electronic and thermal Enthalpies=    | – 3841.182207 |
| Sum of electronic and thermal Free Energies= | – 3841.268241 |

**2,10-Br-NP: *transoid-trans* (TT)**

|                                              |                             |          |              |
|----------------------------------------------|-----------------------------|----------|--------------|
| Temperature                                  | 298.150 Kelvin.             | Pressure | 1.00000 Atm. |
| Zero-point correction=                       | 0.456266 (Hartree/Particle) |          |              |
| Thermal correction to Energy=                | 0.486100                    |          |              |
| Thermal correction to Enthalpy=              | 0.487044                    |          |              |
| Thermal correction to Gibbs Free Energy=     | 0.393445                    |          |              |
| Sum of electronic and zero-point Energies=   | – 6412.396954               |          |              |
| Sum of electronic and thermal Energies=      | – 6412.367120               |          |              |
| Sum of electronic and thermal Enthalpies=    | – 6412.366176               |          |              |
| Sum of electronic and thermal Free Energies= | – 6412.459775               |          |              |

**2,10-Br-NP: *transoid-cis* (TC)**

|                                              |                             |          |              |
|----------------------------------------------|-----------------------------|----------|--------------|
| Temperature                                  | 298.150 Kelvin.             | Pressure | 1.00000 Atm. |
| Zero-point correction=                       | 0.455871 (Hartree/Particle) |          |              |
| Thermal correction to Energy=                | 0.485936                    |          |              |
| Thermal correction to Enthalpy=              | 0.486881                    |          |              |
| Thermal correction to Gibbs Free Energy=     | 0.391656                    |          |              |
| Sum of electronic and zero-point Energies=   | – 6412.392536               |          |              |
| Sum of electronic and thermal Energies=      | – 6412.362471               |          |              |
| Sum of electronic and thermal Enthalpies=    | – 6412.361526               |          |              |
| Sum of electronic and thermal Free Energies= | – 6412.456751               |          |              |

**2,10-Br-NP: *cisoid-cis* (CC)**

|                                          |                             |          |              |
|------------------------------------------|-----------------------------|----------|--------------|
| Temperature                              | 298.150 Kelvin.             | Pressure | 1.00000 Atm. |
| Zero-point correction=                   | 0.456026 (Hartree/Particle) |          |              |
| Thermal correction to Energy=            | 0.485915                    |          |              |
| Thermal correction to Enthalpy=          | 0.486859                    |          |              |
| Thermal correction to Gibbs Free Energy= | 0.392491                    |          |              |

|                                              |               |
|----------------------------------------------|---------------|
| Sum of electronic and zero-point Energies=   | – 6412.389130 |
| Sum of electronic and thermal Energies=      | – 6412.359241 |
| Sum of electronic and thermal Enthalpies=    | – 6412.358297 |
| Sum of electronic and thermal Free Energies= | – 6412.452665 |

**2,10-Br-NP:** *closed form* (CF)

|                                              |                             |          |              |
|----------------------------------------------|-----------------------------|----------|--------------|
| Temperature                                  | 298.150 Kelvin.             | Pressure | 1.00000 Atm. |
| Zero-point correction=                       | 0.458545 (Hartree/Particle) |          |              |
| Thermal correction to Energy=                | 0.487230                    |          |              |
| Thermal correction to Enthalpy=              | 0.488174                    |          |              |
| Thermal correction to Gibbs Free Energy=     | 0.397421                    |          |              |
| Sum of electronic and zero-point Energies=   | – 6412.416364               |          |              |
| Sum of electronic and thermal Energies=      | – 6412.387679               |          |              |
| Sum of electronic and thermal Enthalpies=    | – 6412.386735               |          |              |
| Sum of electronic and thermal Free Energies= | – 6412.477488               |          |              |

Table S7. The molecular structures of the isomers of NP, 10-Br-NP, 2-Br-NP, and 2,10-Br-NP optimized at the DFT CAM-B3LYP/6-31G(d) level of theory, and the calculated relative energies (kJ mol<sup>-1</sup>) with the CF isomers of each naphthopyran derivatives. The relative energies were calculated by using the total energy corrected for zero-point vibrational energy (sum of electronic and zero-point energies).

|                                            | <i>cisoid-cis</i><br>(CC)                                                           | <i>transoid-trans</i><br>(TT)                                                       | <i>transoid-cis</i><br>(TC)                                                          | <i>closed form</i><br>(CF)                                                            |
|--------------------------------------------|-------------------------------------------------------------------------------------|-------------------------------------------------------------------------------------|--------------------------------------------------------------------------------------|---------------------------------------------------------------------------------------|
| <b>NP</b>                                  | 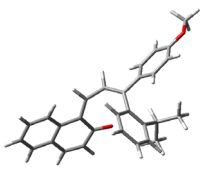   |    |    |    |
| Relative Energy<br>(kJ mol <sup>-1</sup> ) | 71.06                                                                               | 44.08                                                                               | 32.05                                                                                | 0.0                                                                                   |
| <b>10-Br-NP</b>                            |   |  |  |  |
| Relative Energy<br>(kJ mol <sup>-1</sup> ) | 65.13                                                                               | 32.65                                                                               | 31.01                                                                                | 0.0                                                                                   |
| <b>2-Br-NP</b>                             |  |  |  |  |
| Relative Energy<br>(kJ mol <sup>-1</sup> ) | 72.20                                                                               | 63.89                                                                               | 65.70                                                                                | 0.0                                                                                   |
| <b>2,10-Br-NP</b>                          |  |  |  |  |
| Relative Energy<br>(kJ mol <sup>-1</sup> ) | 71.50                                                                               | 50.96                                                                               | 62.56                                                                                | 0.0                                                                                   |



Table S8. Standard orientation of the optimized geometry for the TT isomer of NP.

| Center<br>Number | Atomic<br>Number | Coordinates (Angstroms) |           |           |
|------------------|------------------|-------------------------|-----------|-----------|
|                  |                  | X                       | Y         | Z         |
| 1                | 6                | -4.597288               | 3.562445  | 0.684170  |
| 2                | 6                | -5.362053               | 2.573611  | 0.086946  |
| 3                | 6                | -4.836611               | 1.301228  | -0.147699 |
| 4                | 6                | -3.493402               | 1.015130  | 0.184817  |
| 5                | 6                | -2.759287               | 2.009407  | 0.843042  |
| 6                | 6                | -3.297462               | 3.265981  | 1.082542  |
| 7                | 6                | -5.692881               | 0.244458  | -0.665552 |
| 8                | 6                | -2.955768               | -0.320953 | -0.114406 |
| 9                | 6                | -3.922861               | -1.430717 | -0.397093 |
| 10               | 6                | -5.291453               | -1.030931 | -0.753930 |
| 11               | 6                | -0.479609               | 0.167065  | -0.343667 |
| 12               | 6                | -1.651075               | -0.669236 | -0.272553 |
| 13               | 1                | -6.710992               | 0.518015  | -0.932927 |
| 14               | 1                | -5.017877               | 4.546363  | 0.864846  |
| 15               | 1                | -6.393555               | 2.773925  | -0.189949 |
| 16               | 1                | -2.701515               | 4.014091  | 1.596255  |
| 17               | 1                | -5.950810               | -1.827687 | -1.080659 |
| 18               | 1                | -0.625731               | 1.239784  | -0.386073 |
| 19               | 1                | -1.497060               | -1.732553 | -0.434806 |
| 20               | 8                | -3.591185               | -2.608751 | -0.407745 |
| 21               | 6                | 0.789884                | -0.301396 | -0.423046 |
| 22               | 6                | 1.087524                | -1.765134 | -0.506673 |
| 23               | 6                | 1.651121                | -2.473553 | 0.566743  |
| 24               | 6                | 0.823080                | -2.425049 | -1.710969 |
| 25               | 6                | 1.933019                | -3.829188 | 0.387371  |
| 26               | 6                | 1.113163                | -3.772501 | -1.869794 |
| 27               | 1                | 0.384052                | -1.863268 | -2.529992 |
| 28               | 6                | 1.673871                | -4.477389 | -0.812197 |
| 29               | 1                | 2.362113                | -4.393174 | 1.210569  |
| 30               | 1                | 0.898704                | -4.267395 | -2.811587 |
| 31               | 1                | 1.904567                | -5.532995 | -0.918168 |
| 32               | 6                | 1.943681                | 0.624076  | -0.475439 |
| 33               | 6                | 3.142123                | 0.242289  | -1.101017 |

|    |   |           |           |           |
|----|---|-----------|-----------|-----------|
| 34 | 6 | 1.894465  | 1.901977  | 0.088120  |
| 35 | 6 | 4.218595  | 1.103679  | -1.182788 |
| 36 | 1 | 3.219749  | -0.745313 | -1.542041 |
| 37 | 6 | 2.970062  | 2.778316  | 0.018807  |
| 38 | 1 | 1.004706  | 2.220044  | 0.621486  |
| 39 | 6 | 4.141651  | 2.382229  | -0.625015 |
| 40 | 1 | 5.138252  | 0.810300  | -1.677057 |
| 41 | 1 | 2.888476  | 3.754999  | 0.479519  |
| 42 | 8 | 5.250417  | 3.152481  | -0.750118 |
| 43 | 6 | 1.928851  | -1.816376 | 1.909347  |
| 44 | 1 | 1.632504  | -0.766193 | 1.836120  |
| 45 | 6 | 1.085544  | -2.448940 | 3.023379  |
| 46 | 1 | 1.346605  | -3.501701 | 3.174146  |
| 47 | 1 | 1.250579  | -1.927028 | 3.971864  |
| 48 | 1 | 0.018400  | -2.400982 | 2.787427  |
| 49 | 6 | 3.421268  | -1.846107 | 2.258344  |
| 50 | 1 | 4.016781  | -1.349838 | 1.486476  |
| 51 | 1 | 3.602187  | -1.334620 | 3.209530  |
| 52 | 1 | 3.788145  | -2.873111 | 2.359460  |
| 53 | 1 | -1.767295 | 1.783995  | 1.213339  |
| 54 | 6 | 5.225167  | 4.454292  | -0.204754 |
| 55 | 1 | 4.441508  | 5.067760  | -0.665001 |
| 56 | 1 | 5.074409  | 4.432395  | 0.881158  |
| 57 | 1 | 6.199315  | 4.892087  | -0.423264 |

Table S9. Standard orientation of the optimized geometry for the TC isomer of NP.

| Center<br>Number | Atomic<br>Number | Coordinates (Angstroms) |           |           |
|------------------|------------------|-------------------------|-----------|-----------|
|                  |                  | X                       | Y         | Z         |
| 1                | 6                | 6.486775                | 0.657934  | -0.000690 |
| 2                | 6                | 6.318295                | -0.680541 | 0.302442  |
| 3                | 6                | 5.057171                | -1.281807 | 0.235257  |
| 4                | 6                | 3.923089                | -0.525018 | -0.129503 |
| 5                | 6                | 4.123881                | 0.822996  | -0.459437 |
| 6                | 6                | 5.378534                | 1.406334  | -0.391730 |
| 7                | 6                | 4.916130                | -2.699003 | 0.515005  |
| 8                | 6                | 2.592541                | -1.170917 | -0.165923 |

|    |   |           |           |           |
|----|---|-----------|-----------|-----------|
| 9  | 6 | 2.517166  | -2.652262 | -0.009267 |
| 10 | 6 | 3.747357  | -3.342962 | 0.394308  |
| 11 | 6 | 0.092558  | -0.842344 | -0.314326 |
| 12 | 6 | 1.463057  | -0.411994 | -0.262862 |
| 13 | 1 | 5.812593  | -3.240729 | 0.807863  |
| 14 | 1 | 7.469721  | 1.114595  | 0.052466  |
| 15 | 1 | 7.171594  | -1.287791 | 0.592290  |
| 16 | 1 | 5.494248  | 2.453220  | -0.654900 |
| 17 | 1 | 3.648101  | -4.408032 | 0.573298  |
| 18 | 1 | -0.083365 | -1.907551 | -0.280859 |
| 19 | 1 | 1.594961  | 0.664273  | -0.271635 |
| 20 | 8 | 1.485816  | -3.301539 | -0.168537 |
| 21 | 6 | -0.953369 | 0.018592  | -0.407093 |
| 22 | 6 | -0.743882 | 1.486689  | -0.606386 |
| 23 | 6 | -1.026549 | 2.426592  | 0.399231  |
| 24 | 6 | -0.265885 | 1.923793  | -1.846729 |
| 25 | 6 | -0.819673 | 3.778720  | 0.117039  |
| 26 | 6 | -0.071009 | 3.272668  | -2.108650 |
| 27 | 1 | -0.053332 | 1.184377  | -2.612950 |
| 28 | 6 | -0.352069 | 4.205754  | -1.118151 |
| 29 | 1 | -1.025858 | 4.516400  | 0.887238  |
| 30 | 1 | 0.295979  | 3.590915  | -3.079425 |
| 31 | 1 | -0.205062 | 5.265229  | -1.304904 |
| 32 | 6 | -2.347057 | -0.471326 | -0.375414 |
| 33 | 6 | -3.387932 | 0.273937  | -0.953988 |
| 34 | 6 | -2.685454 | -1.689569 | 0.223193  |
| 35 | 6 | -4.690868 | -0.184647 | -0.951696 |
| 36 | 1 | -3.163793 | 1.223295  | -1.427825 |
| 37 | 6 | -3.990787 | -2.161683 | 0.236438  |
| 38 | 1 | -1.917135 | -2.279948 | 0.710459  |
| 39 | 6 | -5.004197 | -1.409232 | -0.357184 |
| 40 | 1 | -5.490525 | 0.387259  | -1.409566 |
| 41 | 1 | -4.205913 | -3.107389 | 0.718106  |
| 42 | 8 | -6.309299 | -1.773358 | -0.400392 |
| 43 | 6 | -1.507766 | 2.010910  | 1.780743  |
| 44 | 1 | -1.605391 | 0.922117  | 1.788641  |

|    |   |           |           |           |
|----|---|-----------|-----------|-----------|
| 45 | 6 | -0.482525 | 2.381786  | 2.859743  |
| 46 | 1 | -0.345781 | 3.466303  | 2.926706  |
| 47 | 1 | -0.814604 | 2.027316  | 3.840988  |
| 48 | 1 | 0.493444  | 1.934074  | 2.649271  |
| 49 | 6 | -2.887098 | 2.596847  | 2.103115  |
| 50 | 1 | -3.629427 | 2.289224  | 1.361025  |
| 51 | 1 | -3.227293 | 2.254269  | 3.085838  |
| 52 | 1 | -2.863004 | 3.691652  | 2.124036  |
| 53 | 1 | 3.293358  | 1.431536  | -0.798147 |
| 54 | 6 | -6.678732 | -3.007879 | 0.177012  |
| 55 | 1 | -7.753553 | -3.103693 | 0.021913  |
| 56 | 1 | -6.166764 | -3.847428 | -0.307831 |
| 57 | 1 | -6.465562 | -3.028522 | 1.252360  |

Table S10. Standard orientation of the optimized geometry for the CC isomer of NP.

| Center | Atomic | Coordinates (Angstroms) |           |           |
|--------|--------|-------------------------|-----------|-----------|
| Number | Number | X                       | Y         | Z         |
| 1      | 6      | 6.580903                | -1.570570 | 0.616980  |
| 2      | 6      | 6.232683                | -0.862553 | -0.520074 |
| 3      | 6      | 4.894233                | -0.585048 | -0.812769 |
| 4      | 6      | 3.871538                | -1.042783 | 0.043454  |
| 5      | 6      | 4.248263                | -1.723068 | 1.207507  |
| 6      | 6      | 5.579031                | -1.992734 | 1.487478  |
| 7      | 6      | 4.548918                | 0.204987  | -1.982035 |
| 8      | 6      | 2.458087                | -0.773994 | -0.295624 |
| 9      | 6      | 2.162498                | 0.185033  | -1.394504 |
| 10     | 6      | 3.289088                | 0.571230  | -2.254702 |
| 11     | 6      | 0.020729                | -1.492249 | 0.144153  |
| 12     | 6      | 1.469618                | -1.529322 | 0.250826  |
| 13     | 1      | 5.364087                | 0.522705  | -2.627969 |
| 14     | 1      | 7.623294                | -1.778171 | 0.835861  |
| 15     | 1      | 7.002277                | -0.505366 | -1.198964 |
| 16     | 1      | 5.837308                | -2.524438 | 2.398016  |
| 17     | 1      | 3.036243                | 1.190585  | -3.108490 |
| 18     | 1      | -0.418209               | -2.480538 | 0.014661  |
| 19     | 1      | 1.809308                | -2.391537 | 0.824710  |

|    |   |           |           |           |
|----|---|-----------|-----------|-----------|
| 20 | 8 | 1.033966  | 0.593638  | -1.639565 |
| 21 | 6 | -0.848111 | -0.479919 | 0.366037  |
| 22 | 6 | -0.436009 | 0.852998  | 0.890510  |
| 23 | 6 | -0.820555 | 2.075772  | 0.302641  |
| 24 | 6 | 0.311811  | 0.867574  | 2.073930  |
| 25 | 6 | -0.432164 | 3.256837  | 0.937170  |
| 26 | 6 | 0.688191  | 2.054037  | 2.685210  |
| 27 | 1 | 0.583916  | -0.080195 | 2.527143  |
| 28 | 6 | 0.310273  | 3.259374  | 2.110220  |
| 29 | 1 | -0.717285 | 4.206742  | 0.495149  |
| 30 | 1 | 1.263477  | 2.034324  | 3.605630  |
| 31 | 1 | 0.589647  | 4.201423  | 2.572706  |
| 32 | 6 | -2.301122 | -0.770163 | 0.275055  |
| 33 | 6 | -3.194304 | -0.281094 | 1.239507  |
| 34 | 6 | -2.819583 | -1.573340 | -0.740635 |
| 35 | 6 | -4.538279 | -0.599707 | 1.198640  |
| 36 | 1 | -2.819397 | 0.348220  | 2.040114  |
| 37 | 6 | -4.171699 | -1.893458 | -0.802553 |
| 38 | 1 | -2.154706 | -1.937709 | -1.517542 |
| 39 | 6 | -5.038463 | -1.408859 | 0.175115  |
| 40 | 1 | -5.228323 | -0.233468 | 1.951037  |
| 41 | 1 | -4.534682 | -2.507957 | -1.617206 |
| 42 | 8 | -6.372349 | -1.659151 | 0.215985  |
| 43 | 6 | -1.622336 | 2.168173  | -0.988497 |
| 44 | 1 | -1.713823 | 1.160748  | -1.399718 |
| 45 | 6 | -3.034080 | 2.712364  | -0.730247 |
| 46 | 1 | -2.994647 | 3.731030  | -0.328315 |
| 47 | 1 | -3.604019 | 2.747483  | -1.664885 |
| 48 | 1 | -3.586175 | 2.091101  | -0.020846 |
| 49 | 6 | -0.913823 | 3.019836  | -2.049811 |
| 50 | 1 | 0.076397  | 2.617272  | -2.265690 |
| 51 | 1 | -1.498727 | 3.018566  | -2.976206 |
| 52 | 1 | -0.812343 | 4.062956  | -1.731209 |
| 53 | 1 | 3.492329  | -2.025832 | 1.923690  |
| 54 | 6 | -6.929617 | -2.467882 | -0.796889 |
| 55 | 1 | -7.994327 | -2.541284 | -0.573887 |

|    |   |           |           |           |
|----|---|-----------|-----------|-----------|
| 56 | 1 | -6.798543 | -2.018600 | -1.788658 |
| 57 | 1 | -6.490336 | -3.472783 | -0.797057 |

Table S11. Standard orientation of the optimized geometry for the CF isomer of NP.

| Center<br>Number | Atomic<br>Number | Coordinates (Angstroms) |           |           |
|------------------|------------------|-------------------------|-----------|-----------|
|                  |                  | X                       | Y         | Z         |
| 1                | 8                | -0.297821               | -0.337331 | 0.810104  |
| 2                | 8                | 5.525467                | -2.578227 | 0.390251  |
| 3                | 6                | -3.776295               | -0.975402 | -0.230719 |
| 4                | 6                | -0.246674               | -1.093003 | -1.477793 |
| 5                | 1                | 0.380600                | -1.481398 | -2.272774 |
| 6                | 6                | -2.349632               | -0.904640 | -0.289725 |
| 7                | 6                | 1.817479                | -0.777045 | -0.189062 |
| 8                | 6                | -4.442034               | -0.566580 | 0.958306  |
| 9                | 6                | 3.260502                | -2.368395 | 0.923266  |
| 10               | 1                | 3.422138                | -3.150532 | 1.657220  |
| 11               | 6                | 0.963621                | 2.273282  | 0.014878  |
| 12               | 6                | -5.854645               | -0.638194 | 1.025865  |
| 13               | 1                | -6.345626               | -0.321456 | 1.942119  |
| 14               | 6                | -3.673646               | -0.098671 | 2.055812  |
| 15               | 1                | -4.189111               | 0.202914  | 2.963111  |
| 16               | 6                | -2.312903               | -0.016870 | 1.981034  |
| 17               | 1                | -1.712751               | 0.338013  | 2.811350  |
| 18               | 6                | -5.933766               | -1.494507 | -1.218067 |
| 19               | 1                | -6.517686               | -1.848741 | -2.062136 |
| 20               | 6                | 0.453913                | 1.277950  | -0.844939 |
| 21               | 6                | -1.656504               | -0.405131 | 0.794136  |
| 22               | 6                | 4.343770                | -1.951947 | 0.146152  |
| 23               | 6                | 0.419839                | -0.208690 | -0.441025 |
| 24               | 6                | -4.567728               | -1.435731 | -1.313566 |
| 25               | 1                | -4.087450               | -1.733761 | -2.238876 |
| 26               | 6                | 2.900154                | -0.375039 | -0.961353 |
| 27               | 1                | 2.772720                | 0.409541  | -1.700354 |
| 28               | 6                | 2.014951                | -1.793888 | 0.749474  |
| 29               | 1                | 1.179537                | -2.125128 | 1.354727  |
| 30               | 6                | -1.542909               | -1.395269 | -1.399317 |

|    |   |           |           |           |
|----|---|-----------|-----------|-----------|
| 31 | 1 | -1.992735 | -2.049685 | -2.138288 |
| 32 | 6 | -0.026606 | 1.649612  | -2.101117 |
| 33 | 1 | -0.432948 | 0.887600  | -2.755507 |
| 34 | 6 | 0.961631  | 3.594751  | -0.435887 |
| 35 | 1 | 1.344904  | 4.371496  | 0.219212  |
| 36 | 6 | -6.590055 | -1.093425 | -0.035179 |
| 37 | 1 | -7.672409 | -1.143775 | 0.027432  |
| 38 | 6 | 0.486902  | 3.951428  | -1.690563 |
| 39 | 1 | 0.504498  | 4.991313  | -2.002921 |
| 40 | 6 | 1.503402  | 2.002051  | 1.415064  |
| 41 | 1 | 1.457626  | 0.931963  | 1.606905  |
| 42 | 6 | 4.159273  | -0.951882 | -0.804337 |
| 43 | 1 | 4.979254  | -0.608663 | -1.423111 |
| 44 | 6 | 0.633542  | 2.685225  | 2.478052  |
| 45 | 1 | 0.662532  | 3.776028  | 2.383679  |
| 46 | 1 | 0.987724  | 2.429864  | 3.482595  |
| 47 | 1 | -0.410815 | 2.372101  | 2.391793  |
| 48 | 6 | -0.010670 | 2.969566  | -2.532449 |
| 49 | 1 | -0.392878 | 3.223055  | -3.516399 |
| 50 | 6 | 2.970377  | 2.427649  | 1.551119  |
| 51 | 1 | 3.600813  | 1.906128  | 0.825369  |
| 52 | 1 | 3.340976  | 2.189474  | 2.553733  |
| 53 | 1 | 3.097971  | 3.504537  | 1.398895  |
| 54 | 6 | 6.649992  | -2.192377 | -0.368098 |
| 55 | 1 | 6.495822  | -2.373018 | -1.438998 |
| 56 | 1 | 7.478468  | -2.807894 | -0.016327 |
| 57 | 1 | 6.895972  | -1.134466 | -0.215055 |

Table S12. Standard orientation of the optimized geometry for the TT isomer of 10-Br-NP.

| Center<br>Number | Atomic<br>Number | Coordinates (Angstroms) |           |           |
|------------------|------------------|-------------------------|-----------|-----------|
|                  |                  | X                       | Y         | Z         |
| 1                | 6                | 4.192844                | -3.328414 | -0.043435 |
| 2                | 6                | 4.854532                | -2.385798 | -0.814527 |
| 3                | 6                | 4.372785                | -1.082076 | -0.911274 |
| 4                | 6                | 3.165821                | -0.702336 | -0.272568 |
| 5                | 6                | 2.593583                | -1.646216 | 0.592477  |

|    |   |           |           |           |
|----|---|-----------|-----------|-----------|
| 6  | 6 | 3.079193  | -2.945292 | 0.689830  |
| 7  | 6 | 5.172600  | -0.065276 | -1.584728 |
| 8  | 6 | 2.663556  | 0.657558  | -0.517303 |
| 9  | 6 | 3.647894  | 1.721823  | -0.883074 |
| 10 | 6 | 4.881882  | 1.241202  | -1.527732 |
| 11 | 6 | 0.221076  | 0.148471  | -0.790581 |
| 12 | 6 | 1.365515  | 1.017497  | -0.684939 |
| 13 | 1 | 6.080630  | -0.404084 | -2.077511 |
| 14 | 1 | 4.565974  | -4.344470 | 0.028781  |
| 15 | 1 | 5.771145  | -2.648799 | -1.334164 |
| 16 | 1 | 2.593183  | -3.641473 | 1.362984  |
| 17 | 1 | 5.528825  | 2.000612  | -1.953402 |
| 18 | 1 | 0.414789  | -0.909744 | -0.929895 |
| 19 | 1 | 1.199799  | 2.080711  | -0.837071 |
| 20 | 8 | 3.410041  | 2.914652  | -0.772937 |
| 21 | 6 | -1.063259 | 0.565285  | -0.748179 |
| 22 | 6 | -1.406518 | 2.014359  | -0.607728 |
| 23 | 6 | -1.693505 | 2.572148  | 0.648169  |
| 24 | 6 | -1.441807 | 2.815544  | -1.751800 |
| 25 | 6 | -2.007312 | 3.931021  | 0.709002  |
| 26 | 6 | -1.762457 | 4.163803  | -1.670479 |
| 27 | 1 | -1.208539 | 2.368400  | -2.713832 |
| 28 | 6 | -2.046730 | 4.722643  | -0.430893 |
| 29 | 1 | -2.220345 | 4.382783  | 1.673475  |
| 30 | 1 | -1.783394 | 4.773184  | -2.568453 |
| 31 | 1 | -2.293653 | 5.776768  | -0.349320 |
| 32 | 6 | -2.177817 | -0.405206 | -0.802832 |
| 33 | 6 | -3.421556 | -0.048879 | -1.347392 |
| 34 | 6 | -2.034478 | -1.704398 | -0.307027 |
| 35 | 6 | -4.454274 | -0.961568 | -1.432721 |
| 36 | 1 | -3.571398 | 0.958929  | -1.719390 |
| 37 | 6 | -3.068516 | -2.629840 | -0.379009 |
| 38 | 1 | -1.114004 | -1.982696 | 0.195844  |
| 39 | 6 | -4.284444 | -2.263300 | -0.953931 |
| 40 | 1 | -5.411391 | -0.691586 | -1.865450 |
| 41 | 1 | -2.920019 | -3.621507 | 0.030199  |



|    |    |           |           |           |
|----|----|-----------|-----------|-----------|
| 42 | 8  | -5.357080 | -3.084760 | -1.077506 |
| 43 | 6  | -1.629138 | 1.744041  | 1.922271  |
| 44 | 1  | -1.477848 | 0.699977  | 1.634516  |
| 45 | 6  | -0.424871 | 2.146909  | 2.783131  |
| 46 | 1  | -0.488156 | 3.196372  | 3.089896  |
| 47 | 1  | -0.381208 | 1.534485  | 3.690480  |
| 48 | 1  | 0.513756  | 2.009139  | 2.239150  |
| 49 | 6  | -2.934898 | 1.813361  | 2.721071  |
| 50 | 1  | -3.788190 | 1.502679  | 2.110795  |
| 51 | 1  | -2.882347 | 1.154488  | 3.593945  |
| 52 | 1  | -3.133386 | 2.826437  | 3.086302  |
| 53 | 35 | 1.215923  | -1.187438 | 1.825775  |
| 54 | 6  | -5.240607 | -4.410075 | -0.606697 |
| 55 | 1  | -4.444871 | -4.954147 | -1.129455 |
| 56 | 1  | -5.046553 | -4.438325 | 0.472234  |
| 57 | 1  | -6.198338 | -4.888884 | -0.811852 |

Table S13. Standard orientation of the optimized geometry for the TC isomer of 10-Br-NP.

| Center<br>Number | Atomic<br>Number | Coordinates (Angstroms) |           |           |
|------------------|------------------|-------------------------|-----------|-----------|
|                  |                  | X                       | Y         | Z         |
| 1                | 6                | -6.065485               | 0.273313  | 0.797864  |
| 2                | 6                | -5.598972               | 1.528170  | 1.143847  |
| 3                | 6                | -4.310461               | 1.931138  | 0.793849  |
| 4                | 6                | -3.421717               | 1.061031  | 0.111704  |
| 5                | 6                | -3.961119               | -0.173682 | -0.290257 |
| 6                | 6                | -5.247622               | -0.567183 | 0.056374  |
| 7                | 6                | -3.901674               | 3.298029  | 1.075600  |
| 8                | 6                | -2.040637               | 1.528434  | -0.131614 |
| 9                | 6                | -1.784754               | 2.996782  | -0.118233 |
| 10               | 6                | -2.751643               | 3.814531  | 0.625951  |
| 11               | 6                | 0.405413                | 0.963481  | -0.317881 |
| 12               | 6                | -0.989835               | 0.657552  | -0.147387 |
| 13               | 1                | -4.606901               | 3.919067  | 1.622405  |
| 14               | 1                | -7.066962               | -0.042945 | 1.069337  |
| 15               | 1                | -6.237803               | 2.223575  | 1.680191  |
| 16               | 1                | -5.608022               | -1.533247 | -0.276179 |

|    |   |           |           |           |
|----|---|-----------|-----------|-----------|
| 17 | 1 | -2.480599 | 4.854386  | 0.772848  |
| 18 | 1 | 0.662493  | 1.998207  | -0.494752 |
| 19 | 1 | -1.208663 | -0.385492 | 0.042059  |
| 20 | 8 | -0.793676 | 3.521310  | -0.615234 |
| 21 | 6 | 1.383556  | 0.023809  | -0.279045 |
| 22 | 6 | 1.071134  | -1.437614 | -0.214692 |
| 23 | 6 | 1.338749  | -2.210146 | 0.928569  |
| 24 | 6 | 0.523938  | -2.046360 | -1.348787 |
| 25 | 6 | 1.047237  | -3.574882 | 0.886740  |
| 26 | 6 | 0.246777  | -3.406103 | -1.371733 |
| 27 | 1 | 0.318133  | -1.434126 | -2.221234 |
| 28 | 6 | 0.513040  | -4.174477 | -0.245768 |
| 29 | 1 | 1.239772  | -4.183541 | 1.765605  |
| 30 | 1 | -0.174142 | -3.860479 | -2.263303 |
| 31 | 1 | 0.300738  | -5.239306 | -0.245666 |
| 32 | 6 | 2.807945  | 0.409241  | -0.369594 |
| 33 | 6 | 3.770542  | -0.494030 | -0.849830 |
| 34 | 6 | 3.251986  | 1.680118  | 0.009543  |
| 35 | 6 | 5.100021  | -0.137295 | -0.963840 |
| 36 | 1 | 3.462385  | -1.488380 | -1.153660 |
| 37 | 6 | 4.585426  | 2.052065  | -0.095944 |
| 38 | 1 | 2.545699  | 2.395433  | 0.416885  |
| 39 | 6 | 5.519582  | 1.141451  | -0.589366 |
| 40 | 1 | 5.839361  | -0.832371 | -1.346497 |
| 41 | 1 | 4.883803  | 3.044936  | 0.216892  |
| 42 | 8 | 6.843073  | 1.397709  | -0.733341 |
| 43 | 6 | 1.893165  | -1.596887 | 2.204967  |
| 44 | 1 | 2.052272  | -0.530569 | 2.023451  |
| 45 | 6 | 0.889515  | -1.716591 | 3.358773  |
| 46 | 1 | 0.696990  | -2.763956 | 3.614343  |
| 47 | 1 | 1.275749  | -1.220966 | 4.255527  |
| 48 | 1 | -0.068119 | -1.254705 | 3.100275  |
| 49 | 6 | 3.248540  | -2.202483 | 2.587092  |
| 50 | 1 | 3.979078  | -2.072373 | 1.783542  |
| 51 | 1 | 3.643202  | -1.718696 | 3.486619  |
| 52 | 1 | 3.163972  | -3.274074 | 2.797275  |

|    |    |           |           |           |
|----|----|-----------|-----------|-----------|
| 53 | 35 | -3.040941 | -1.394136 | -1.432601 |
| 54 | 6  | 7.317658  | 2.680706  | -0.383870 |
| 55 | 1  | 6.840201  | 3.463227  | -0.985305 |
| 56 | 1  | 7.154865  | 2.893945  | 0.679335  |
| 57 | 1  | 8.388416  | 2.672357  | -0.588571 |

Table S14. Standard orientation of the optimized geometry for the CC isomer of 10-Br-NP.

| Center<br>Number | Atomic<br>Number | Coordinates (Angstroms) |           |           |
|------------------|------------------|-------------------------|-----------|-----------|
|                  |                  | X                       | Y         | Z         |
| 1                | 6                | 6.245090                | -0.506082 | -0.850219 |
| 2                | 6                | 5.658876                | 0.455721  | -1.651954 |
| 3                | 6                | 4.277654                | 0.649945  | -1.638409 |
| 4                | 6                | 3.427255                | -0.151273 | -0.835957 |
| 5                | 6                | 4.067781                | -1.068109 | 0.015145  |
| 6                | 6                | 5.444209                | -1.253786 | 0.001536  |
| 7                | 6                | 3.711326                | 1.740053  | -2.417141 |
| 8                | 6                | 1.968032                | 0.061029  | -0.933797 |
| 9                | 6                | 1.472119                | 1.341995  | -1.502705 |
| 10               | 6                | 2.421303                | 2.087568  | -2.340420 |
| 11               | 6                | -0.350823               | -1.035958 | -0.794238 |
| 12               | 6                | 1.098756                | -0.973016 | -0.779035 |
| 13               | 1                | 4.398921                | 2.310911  | -3.036164 |
| 14               | 1                | 7.318987                | -0.658839 | -0.859180 |
| 15               | 1                | 6.270145                | 1.083635  | -2.293285 |
| 16               | 1                | 5.883948                | -1.978586 | 0.675983  |
| 17               | 1                | 2.013969                | 2.939355  | -2.874205 |
| 18               | 1                | -0.732891               | -1.885091 | -1.358379 |
| 19               | 1                | 1.548619                | -1.958455 | -0.693463 |
| 20               | 8                | 0.315155                | 1.725261  | -1.392562 |
| 21               | 6                | -1.258362               | -0.349245 | -0.061096 |
| 22               | 6                | -0.890961               | 0.605227  | 1.023613  |
| 23               | 6                | -1.441204               | 1.898601  | 1.140119  |
| 24               | 6                | -0.004058               | 0.147336  | 2.004959  |
| 25               | 6                | -1.080972               | 2.665431  | 2.249380  |
| 26               | 6                | 0.344576                | 0.930962  | 3.094555  |
| 27               | 1                | 0.419755                | -0.845459 | 1.905575  |

|    |    |           |           |           |
|----|----|-----------|-----------|-----------|
| 28 | 6  | -0.204447 | 2.199366  | 3.219816  |
| 29 | 1  | -1.494537 | 3.664217  | 2.352516  |
| 30 | 1  | 1.035645  | 0.547906  | 3.838990  |
| 31 | 1  | 0.049067  | 2.828309  | 4.068158  |
| 32 | 6  | -2.689394 | -0.718172 | -0.203089 |
| 33 | 6  | -3.512173 | -0.857176 | 0.924191  |
| 34 | 6  | -3.249608 | -0.985326 | -1.452246 |
| 35 | 6  | -4.826985 | -1.265087 | 0.804906  |
| 36 | 1  | -3.103160 | -0.654850 | 1.908651  |
| 37 | 6  | -4.574807 | -1.384120 | -1.590211 |
| 38 | 1  | -2.642330 | -0.853944 | -2.342381 |
| 39 | 6  | -5.369752 | -1.530841 | -0.455029 |
| 40 | 1  | -5.461324 | -1.387261 | 1.676147  |
| 41 | 1  | -4.974035 | -1.566511 | -2.580325 |
| 42 | 8  | -6.671204 | -1.917227 | -0.469485 |
| 43 | 6  | -2.380959 | 2.506327  | 0.107486  |
| 44 | 1  | -2.452895 | 1.812693  | -0.732641 |
| 45 | 6  | -3.789293 | 2.711107  | 0.681489  |
| 46 | 1  | -3.773245 | 3.415506  | 1.520586  |
| 47 | 1  | -4.455054 | 3.123972  | -0.083966 |
| 48 | 1  | -4.223193 | 1.773206  | 1.036788  |
| 49 | 6  | -1.839511 | 3.828457  | -0.452219 |
| 50 | 1  | -0.852118 | 3.683676  | -0.892238 |
| 51 | 1  | -2.513595 | 4.206412  | -1.228919 |
| 52 | 1  | -1.772585 | 4.598774  | 0.323675  |
| 53 | 35 | 3.150451  | -2.089925 | 1.345737  |
| 54 | 6  | -7.269247 | -2.198574 | -1.715907 |
| 55 | 1  | -7.274263 | -1.317208 | -2.368515 |
| 56 | 1  | -6.760548 | -3.023146 | -2.229838 |
| 57 | 1  | -8.297193 | -2.490274 | -1.499131 |

Table S15. Standard orientation of the optimized geometry for the CF isomer of 10-Br-NP.

| Center<br>Number | Atomic<br>Number | Coordinates (Angstroms) |           |           |
|------------------|------------------|-------------------------|-----------|-----------|
|                  |                  | X                       | Y         | Z         |
| 1                | 35               | -3.979509               | -1.370220 | -1.776430 |
| 2                | 8                | 6.275760                | -2.282739 | -0.095666 |

|    |   |           |           |           |
|----|---|-----------|-----------|-----------|
| 3  | 8 | 0.536438  | -0.003180 | 1.153304  |
| 4  | 6 | -1.140705 | -1.437606 | -0.443323 |
| 5  | 1 | -1.729259 | -2.255654 | -0.831958 |
| 6  | 6 | 5.006000  | -1.800291 | -0.039625 |
| 7  | 6 | -4.209919 | -0.788070 | 0.028359  |
| 8  | 6 | -3.120341 | -0.403753 | 0.864423  |
| 9  | 6 | -3.485652 | 0.210821  | 2.103766  |
| 10 | 6 | 0.886027  | 1.139750  | -0.969513 |
| 11 | 6 | -1.722727 | -0.554591 | 0.566677  |
| 12 | 6 | -4.840203 | 0.319776  | 2.491920  |
| 13 | 1 | -5.065482 | 0.780542  | 3.449177  |
| 14 | 6 | 0.144577  | 1.194372  | -2.150850 |
| 15 | 1 | -0.372439 | 0.304735  | -2.489983 |
| 16 | 6 | 0.036776  | 2.362176  | -2.894531 |
| 17 | 1 | -0.549065 | 2.369846  | -3.808354 |
| 18 | 6 | 4.146409  | -1.955350 | 1.044689  |
| 19 | 1 | 4.457916  | -2.491201 | 1.932961  |
| 20 | 6 | 2.421087  | -0.710681 | -0.120884 |
| 21 | 6 | 0.134985  | -1.300939 | -0.805395 |
| 22 | 1 | 0.607689  | -1.992865 | -1.493321 |
| 23 | 6 | 3.292512  | -0.568960 | -1.204382 |
| 24 | 1 | 2.970623  | -0.024411 | -2.086255 |
| 25 | 6 | -2.475355 | 0.733194  | 2.954087  |
| 26 | 1 | -2.777538 | 1.194928  | 3.889198  |
| 27 | 6 | 2.862255  | -1.418848 | 0.990011  |
| 28 | 1 | 2.196582  | -1.546628 | 1.835380  |
| 29 | 6 | -5.517931 | -0.673644 | 0.427019  |
| 30 | 1 | -6.304304 | -0.978802 | -0.252926 |
| 31 | 6 | -0.795743 | 0.056859  | 1.394918  |
| 32 | 6 | 0.674199  | 3.510128  | -2.451368 |
| 33 | 1 | 0.600732  | 4.435968  | -3.014109 |
| 34 | 6 | 1.706589  | 3.339022  | 1.777980  |
| 35 | 1 | 1.686642  | 4.368348  | 1.404404  |
| 36 | 1 | 2.266569  | 3.339269  | 2.719475  |
| 37 | 1 | 0.675221  | 3.043644  | 1.991727  |
| 38 | 6 | 1.407442  | 3.469594  | -1.273545 |

|    |   |           |           |           |
|----|---|-----------|-----------|-----------|
| 39 | 1 | 1.898687  | 4.375446  | -0.930934 |
| 40 | 6 | 4.567479  | -1.105388 | -1.168525 |
| 41 | 1 | 5.248487  | -0.995081 | -2.005437 |
| 42 | 6 | -5.843313 | -0.135219 | 1.683110  |
| 43 | 1 | -6.883342 | -0.055755 | 1.980887  |
| 44 | 6 | -1.162016 | 0.686778  | 2.602396  |
| 45 | 1 | -0.379556 | 1.099901  | 3.228773  |
| 46 | 6 | 1.535795  | 2.305691  | -0.513167 |
| 47 | 6 | 3.810451  | 2.786739  | 0.490218  |
| 48 | 1 | 4.291250  | 2.079482  | -0.191415 |
| 49 | 1 | 4.384400  | 2.801321  | 1.422862  |
| 50 | 1 | 3.878124  | 3.785035  | 0.045393  |
| 51 | 6 | 0.984638  | -0.198023 | -0.212534 |
| 52 | 6 | 6.766645  | -2.990118 | 1.021224  |
| 53 | 1 | 6.780809  | -2.363289 | 1.921202  |
| 54 | 1 | 7.787103  | -3.281502 | 0.770813  |
| 55 | 1 | 6.173123  | -3.890544 | 1.221366  |
| 56 | 6 | 2.357294  | 2.383774  | 0.769093  |
| 57 | 1 | 2.378741  | 1.399161  | 1.231533  |

Table S16. Standard orientation of the optimized geometry for the TT isomer of 2-Br-NP.

| Center<br>Number | Atomic<br>Number | Coordinates (Angstroms) |           |           |
|------------------|------------------|-------------------------|-----------|-----------|
|                  |                  | X                       | Y         | Z         |
| 1                | 6                | -5.255753               | -0.532148 | -2.195638 |
| 2                | 6                | -5.675361               | 0.129372  | -1.052450 |
| 3                | 6                | -4.750198               | 0.629475  | -0.134594 |
| 4                | 6                | -3.368326               | 0.431901  | -0.343386 |
| 5                | 6                | -2.964247               | -0.198909 | -1.523947 |
| 6                | 6                | -3.893645               | -0.679487 | -2.435687 |
| 7                | 6                | -5.209195               | 1.413940  | 1.002865  |
| 8                | 6                | -2.415036               | 0.962297  | 0.645199  |
| 9                | 6                | -2.915003               | 1.954056  | 1.662965  |
| 10               | 6                | -4.369644               | 2.055831  | 1.826275  |
| 11               | 6                | -0.282336               | -0.399935 | 0.200268  |
| 12               | 6                | -1.105790               | 0.655955  | 0.783481  |
| 13               | 1                | -6.284317               | 1.506379  | 1.137983  |

|    |   |           |           |           |
|----|---|-----------|-----------|-----------|
| 14 | 1 | -5.983425 | -0.914052 | -2.904447 |
| 15 | 1 | -6.735026 | 0.281615  | -0.866849 |
| 16 | 1 | -3.549426 | -1.168075 | -3.341679 |
| 17 | 1 | -4.715747 | 2.685708  | 2.638260  |
| 18 | 1 | -0.582288 | 1.280905  | 1.506927  |
| 19 | 8 | -2.156088 | 2.606022  | 2.365920  |
| 20 | 6 | 0.997740  | -0.261017 | -0.205222 |
| 21 | 6 | 1.626176  | 1.076407  | -0.319983 |
| 22 | 6 | 0.907961  | 2.224218  | -0.693826 |
| 23 | 6 | 2.995782  | 1.226856  | -0.079239 |
| 24 | 6 | 1.519559  | 3.459788  | -0.779952 |
| 25 | 6 | 3.622264  | 2.463053  | -0.153172 |
| 26 | 1 | 3.589536  | 0.355668  | 0.173324  |
| 27 | 6 | 2.880878  | 3.592702  | -0.500132 |
| 28 | 1 | 0.962457  | 4.342333  | -1.073816 |
| 29 | 1 | 4.682715  | 2.532482  | 0.054774  |
| 30 | 6 | 1.845855  | -1.423139 | -0.618276 |
| 31 | 6 | 2.125090  | -1.547291 | -1.982606 |
| 32 | 6 | 2.402576  | -2.335481 | 0.294692  |
| 33 | 6 | 2.923771  | -2.571920 | -2.464589 |
| 34 | 1 | 1.700092  | -0.822429 | -2.670613 |
| 35 | 6 | 3.220080  | -3.349615 | -0.212018 |
| 36 | 6 | 3.477985  | -3.478364 | -1.568762 |
| 37 | 1 | 3.117464  | -2.657576 | -3.529170 |
| 38 | 1 | 3.666925  | -4.059031 | 0.478200  |
| 39 | 1 | -1.909861 | -0.307697 | -1.742697 |
| 40 | 8 | 3.390188  | 4.843365  | -0.608802 |
| 41 | 1 | 4.113656  | -4.283368 | -1.924989 |
| 42 | 6 | 2.181700  | -2.240281 | 1.797876  |
| 43 | 1 | 1.422203  | -1.475531 | 1.977919  |
| 44 | 6 | 3.462615  | -1.801644 | 2.520761  |
| 45 | 1 | 3.814441  | -0.828869 | 2.164618  |
| 46 | 1 | 3.284358  | -1.719268 | 3.597971  |
| 47 | 1 | 4.270133  | -2.526151 | 2.369942  |
| 48 | 6 | 1.654885  | -3.552753 | 2.389763  |
| 49 | 1 | 0.740101  | -3.867820 | 1.883439  |

|    |    |           |           |           |
|----|----|-----------|-----------|-----------|
| 50 | 1  | 2.390319  | -4.359685 | 2.306467  |
| 51 | 1  | 1.429450  | -3.422628 | 3.453151  |
| 52 | 1  | -0.142638 | 2.143904  | -0.946228 |
| 53 | 35 | -1.055132 | -2.149901 | 0.253554  |
| 54 | 6  | 4.762862  | 5.033349  | -0.337575 |
| 55 | 1  | 5.011244  | 4.751963  | 0.692523  |
| 56 | 1  | 5.392290  | 4.461421  | -1.029696 |
| 57 | 1  | 4.952676  | 6.097940  | -0.475174 |

Table S17. Standard orientation of the optimized geometry for the TC isomer of 2-Br-NP.

| Center<br>Number | Atomic<br>Number | Coordinates (Angstroms) |           |           |
|------------------|------------------|-------------------------|-----------|-----------|
|                  |                  | X                       | Y         | Z         |
| 1                | 6                | -6.292261               | 1.193122  | -0.801548 |
| 2                | 6                | -6.168566               | 0.080741  | 0.012376  |
| 3                | 6                | -4.913036               | -0.457242 | 0.309072  |
| 4                | 6                | -3.748846               | 0.121421  | -0.237867 |
| 5                | 6                | -3.894567               | 1.253045  | -1.046894 |
| 6                | 6                | -5.144809               | 1.783470  | -1.324870 |
| 7                | 6                | -4.807618               | -1.603505 | 1.200591  |
| 8                | 6                | -2.438424               | -0.498460 | 0.059668  |
| 9                | 6                | -2.367207               | -1.509006 | 1.159641  |
| 10               | 6                | -3.631419               | -2.102047 | 1.605112  |
| 11               | 6                | 0.010111                | -0.792742 | -0.584006 |
| 12               | 6                | -1.319642               | -0.171868 | -0.620790 |
| 13               | 1                | -5.737841               | -2.032748 | 1.565158  |
| 14               | 1                | -7.271790               | 1.604662  | -1.022017 |
| 15               | 1                | -7.052489               | -0.385606 | 0.438572  |
| 16               | 1                | -5.223606               | 2.666125  | -1.951665 |
| 17               | 1                | -3.554821               | -2.924607 | 2.307450  |
| 18               | 1                | -1.384358               | 0.628617  | -1.353666 |
| 19               | 8                | -1.303646               | -1.816090 | 1.679775  |
| 20               | 6                | 1.168982                | -0.118797 | -0.494585 |
| 21               | 6                | 1.169681                | 1.335209  | -0.194999 |
| 22               | 6                | 0.304928                | 1.891987  | 0.760459  |
| 23               | 6                | 2.058548                | 2.193883  | -0.845254 |
| 24               | 6                | 0.305337                | 3.249225  | 1.022670  |



|    |    |           |           |           |
|----|----|-----------|-----------|-----------|
| 25 | 6  | 2.064600  | 3.560894  | -0.596792 |
| 26 | 1  | 2.758719  | 1.786658  | -1.566941 |
| 27 | 6  | 1.179865  | 4.096420  | 0.339200  |
| 28 | 1  | -0.354059 | 3.678782  | 1.768868  |
| 29 | 1  | 2.762427  | 4.193453  | -1.131382 |
| 30 | 6  | 2.495253  | -0.769893 | -0.718483 |
| 31 | 6  | 2.895002  | -1.008834 | -2.034994 |
| 32 | 6  | 3.344640  | -1.107358 | 0.347289  |
| 33 | 6  | 4.137091  | -1.559501 | -2.316494 |
| 34 | 1  | 2.213284  | -0.760023 | -2.843073 |
| 35 | 6  | 4.585639  | -1.669518 | 0.043079  |
| 36 | 6  | 4.986819  | -1.888927 | -1.268321 |
| 37 | 1  | 4.435346  | -1.734119 | -3.345578 |
| 38 | 1  | 5.254650  | -1.947510 | 0.851245  |
| 39 | 1  | -3.020276 | 1.746027  | -1.456627 |
| 40 | 8  | 1.104022  | 5.412149  | 0.662053  |
| 41 | 1  | 5.961141  | -2.324267 | -1.469435 |
| 42 | 6  | 2.888353  | -0.958773 | 1.789108  |
| 43 | 1  | 2.086396  | -0.215082 | 1.807863  |
| 44 | 6  | 3.988240  | -0.460974 | 2.729797  |
| 45 | 1  | 4.437996  | 0.468103  | 2.366019  |
| 46 | 1  | 3.571195  | -0.270443 | 3.723663  |
| 47 | 1  | 4.788172  | -1.198618 | 2.852777  |
| 48 | 6  | 2.289136  | -2.283344 | 2.284819  |
| 49 | 1  | 1.488174  | -2.621293 | 1.623643  |
| 50 | 1  | 3.057736  | -3.064139 | 2.319295  |
| 51 | 1  | 1.874141  | -2.167640 | 3.291269  |
| 52 | 1  | -0.349298 | 1.238378  | 1.326716  |
| 53 | 35 | 0.041235  | -2.670376 | -0.915139 |
| 54 | 6  | 1.985731  | 6.309519  | 0.022232  |
| 55 | 1  | 1.759665  | 7.295805  | 0.428104  |
| 56 | 1  | 3.033326  | 6.063534  | 0.232999  |
| 57 | 1  | 1.830566  | 6.321755  | -1.063306 |

---

Table S18. Standard orientation of the optimized geometry for the CC isomer of 2-Br-NP.

| Center<br>Number | Atomic<br>Number | Coordinates (Angstroms) |           |           |
|------------------|------------------|-------------------------|-----------|-----------|
|                  |                  | X                       | Y         | Z         |
| 1                | 6                | -6.192702               | -1.365623 | -0.671082 |
| 2                | 6                | -5.722125               | -1.277537 | 0.627892  |
| 3                | 6                | -4.366171               | -1.061674 | 0.887586  |
| 4                | 6                | -3.450670               | -0.950402 | -0.178560 |
| 5                | 6                | -3.951785               | -1.006279 | -1.483523 |
| 6                | 6                | -5.299878               | -1.218973 | -1.729312 |
| 7                | 6                | -3.896171               | -0.917023 | 2.255278  |
| 8                | 6                | -2.011991               | -0.765006 | 0.110838  |
| 9                | 6                | -1.610655               | -0.410745 | 1.506679  |
| 10               | 6                | -2.625665               | -0.610169 | 2.549638  |
| 11               | 6                | 0.363212                | -0.985648 | -0.796844 |
| 12               | 6                | -1.090700               | -1.078475 | -0.833658 |
| 13               | 1                | -4.629423               | -1.035103 | 3.049532  |
| 14               | 1                | -7.248207               | -1.530535 | -0.861287 |
| 15               | 1                | -6.408312               | -1.368626 | 1.465352  |
| 16               | 1                | -5.657409               | -1.258754 | -2.753406 |
| 17               | 1                | -2.284067               | -0.460389 | 3.567935  |
| 18               | 1                | -1.459231               | -1.567067 | -1.733052 |
| 19               | 8                | -0.487347               | -0.029979 | 1.809954  |
| 20               | 6                | 1.156819                | 0.079578  | -0.589761 |
| 21               | 6                | 0.585484                | 1.445275  | -0.512708 |
| 22               | 6                | -0.381483               | 1.890694  | -1.423190 |
| 23               | 6                | 1.043533                | 2.351612  | 0.443786  |
| 24               | 6                | -0.890966               | 3.173805  | -1.359309 |
| 25               | 6                | 0.535905                | 3.641218  | 0.527640  |
| 26               | 1                | 1.806404                | 2.038437  | 1.147651  |
| 27               | 6                | -0.441647               | 4.057153  | -0.375644 |
| 28               | 1                | -1.631555               | 3.523588  | -2.070102 |
| 29               | 1                | 0.908445                | 4.308209  | 1.295026  |
| 30               | 6                | 2.646093                | -0.008089 | -0.524417 |
| 31               | 6                | 3.357868                | 0.646428  | -1.536142 |
| 32               | 6                | 3.341167                | -0.652417 | 0.515451  |
| 33               | 6                | 4.742552                | 0.649466  | -1.558841 |

|    |    |           |           |           |
|----|----|-----------|-----------|-----------|
| 34 | 1  | 2.802920  | 1.155509  | -2.318339 |
| 35 | 6  | 4.738485  | -0.614959 | 0.482634  |
| 36 | 6  | 5.437418  | 0.014542  | -0.536205 |
| 37 | 1  | 5.274072  | 1.149656  | -2.362303 |
| 38 | 1  | 5.294205  | -1.094288 | 1.282846  |
| 39 | 1  | -3.284659 | -0.857168 | -2.325244 |
| 40 | 8  | -1.000803 | 5.294029  | -0.389567 |
| 41 | 1  | 6.523342  | 0.013924  | -0.528432 |
| 42 | 6  | 2.647115  | -1.332974 | 1.686585  |
| 43 | 1  | 1.580178  | -1.381312 | 1.469840  |
| 44 | 6  | 2.801178  | -0.506856 | 2.970020  |
| 45 | 1  | 2.355085  | 0.485232  | 2.858087  |
| 46 | 1  | 2.293796  | -1.003664 | 3.803327  |
| 47 | 1  | 3.855241  | -0.381282 | 3.241810  |
| 48 | 6  | 3.145131  | -2.767194 | 1.899790  |
| 49 | 1  | 3.038027  | -3.357154 | 0.986403  |
| 50 | 1  | 4.196391  | -2.796097 | 2.205415  |
| 51 | 1  | 2.561890  | -3.252728 | 2.689009  |
| 52 | 1  | -0.723238 | 1.224070  | -2.207987 |
| 53 | 35 | 1.141865  | -2.686372 | -1.238002 |
| 54 | 6  | -0.574934 | 6.229021  | 0.577996  |
| 55 | 1  | -1.145337 | 7.139074  | 0.390301  |
| 56 | 1  | -0.780618 | 5.877078  | 1.595940  |
| 57 | 1  | 0.495475  | 6.447507  | 0.482952  |

Table S19. Standard orientation of the optimized geometry for the CF isomer of 2-Br-NP.

| Center<br>Number | Atomic<br>Number | Coordinates (Angstroms) |           |           |
|------------------|------------------|-------------------------|-----------|-----------|
|                  |                  | X                       | Y         | Z         |
| 1                | 35               | 0.753237                | -2.626943 | 1.429017  |
| 2                | 8                | -0.388963               | 0.405646  | -1.104678 |
| 3                | 8                | 5.547584                | -1.243726 | -1.924670 |
| 4                | 6                | -0.303221               | -1.357701 | 0.505351  |
| 5                | 6                | -1.747058               | 0.336439  | -1.112905 |
| 6                | 6                | -0.115843               | 0.684472  | 2.433428  |
| 7                | 1                | -0.391698               | -0.340276 | 2.645465  |
| 8                | 6                | 0.304960                | 1.031985  | 1.148068  |

|    |   |           |           |           |
|----|---|-----------|-----------|-----------|
| 9  | 6 | -1.601215 | -1.593377 | 0.316029  |
| 10 | 1 | -2.034561 | -2.523821 | 0.661773  |
| 11 | 6 | -3.781321 | 1.187423  | -2.051499 |
| 12 | 1 | -4.311247 | 1.881145  | -2.697702 |
| 13 | 6 | 0.176924  | 2.930970  | 3.207733  |
| 14 | 1 | 0.128421  | 3.678576  | 3.993740  |
| 15 | 6 | 3.236626  | -1.082685 | -2.218991 |
| 16 | 1 | 3.399624  | -1.440053 | -3.229927 |
| 17 | 6 | 0.684460  | 2.365979  | 0.888477  |
| 18 | 6 | -2.422414 | -0.631280 | -0.400497 |
| 19 | 6 | 0.351849  | -0.053185 | 0.053128  |
| 20 | 6 | 1.767571  | -0.315715 | -0.457749 |
| 21 | 6 | -0.180283 | 1.616050  | 3.460214  |
| 22 | 1 | -0.512630 | 1.309621  | 4.447008  |
| 23 | 6 | 1.967709  | -0.786513 | -1.758289 |
| 24 | 1 | 1.116076  | -0.908791 | -2.416923 |
| 25 | 6 | 4.343315  | -0.928195 | -1.381010 |
| 26 | 6 | 2.873676  | -0.173571 | 0.369823  |
| 27 | 1 | 2.742607  | 0.174752  | 1.388459  |
| 28 | 6 | -6.663387 | -0.721130 | -0.666018 |
| 29 | 1 | -7.746211 | -0.746755 | -0.733975 |
| 30 | 6 | -5.989077 | -1.635611 | 0.170275  |
| 31 | 1 | -6.559434 | -2.358897 | 0.744899  |
| 32 | 6 | -2.419696 | 1.239162  | -1.962213 |
| 33 | 1 | -1.833839 | 1.954140  | -2.528287 |
| 34 | 6 | -4.532484 | 0.242091  | -1.305179 |
| 35 | 6 | 1.176662  | 2.879767  | -0.460985 |
| 36 | 1 | 1.192337  | 2.052515  | -1.167329 |
| 37 | 6 | -4.622020 | -1.615925 | 0.268444  |
| 38 | 1 | -4.127475 | -2.318063 | 0.930428  |
| 39 | 6 | 4.157776  | -0.473755 | -0.078198 |
| 40 | 1 | 4.995576  | -0.349385 | 0.596686  |
| 41 | 6 | -5.945515 | 0.196917  | -1.384303 |
| 42 | 1 | -6.450977 | 0.910113  | -2.029709 |
| 43 | 6 | 0.602336  | 3.286294  | 1.936009  |
| 44 | 1 | 0.882707  | 4.318156  | 1.747359  |

|    |   |           |           |           |
|----|---|-----------|-----------|-----------|
| 45 | 6 | -3.849819 | -0.682072 | -0.466656 |
| 46 | 6 | 6.696743  | -1.108586 | -1.117966 |
| 47 | 1 | 6.840585  | -0.071215 | -0.792166 |
| 48 | 1 | 7.540306  | -1.409888 | -1.739652 |
| 49 | 1 | 6.648289  | -1.758068 | -0.235547 |
| 50 | 6 | 0.223869  | 3.940507  | -1.027719 |
| 51 | 1 | -0.799521 | 3.560688  | -1.091242 |
| 52 | 1 | 0.542939  | 4.241265  | -2.031459 |
| 53 | 1 | 0.204970  | 4.840600  | -0.404176 |
| 54 | 6 | 2.606154  | 3.428332  | -0.369529 |
| 55 | 1 | 2.670987  | 4.285251  | 0.309337  |
| 56 | 1 | 2.945374  | 3.761682  | -1.356016 |
| 57 | 1 | 3.300883  | 2.661821  | -0.015507 |

Table S20. Standard orientation of the optimized geometry for the TT isomer of 2,10-Br-NP.

| Center<br>Number | Atomic<br>Number | Coordinates (Angstroms) |           |           |
|------------------|------------------|-------------------------|-----------|-----------|
|                  |                  | X                       | Y         | Z         |
| 1                | 6                | -5.450146               | -0.584562 | -0.998804 |
| 2                | 6                | -5.551639               | -0.017647 | 0.261688  |
| 3                | 6                | -4.453041               | 0.604657  | 0.849780  |
| 4                | 6                | -3.192711               | 0.621970  | 0.203656  |
| 5                | 6                | -3.157825               | 0.136946  | -1.109593 |
| 6                | 6                | -4.257235               | -0.477179 | -1.697311 |
| 7                | 6                | -4.633857               | 1.340653  | 2.095951  |
| 8                | 6                | -2.060398               | 1.212297  | 0.935907  |
| 9                | 6                | -2.366073               | 2.248686  | 1.982056  |
| 10               | 6                | -3.696621               | 2.153130  | 2.599945  |
| 11               | 6                | -0.079693               | -0.328025 | 0.393808  |
| 12               | 6                | -0.759684               | 0.839527  | 0.930854  |
| 13               | 1                | -5.610781               | 1.271103  | 2.567847  |
| 14               | 1                | -6.304442               | -1.071777 | -1.456634 |
| 15               | 1                | -6.497175               | -0.032470 | 0.795444  |
| 16               | 1                | -4.172731               | -0.853315 | -2.709752 |
| 17               | 1                | -3.867490               | 2.772445  | 3.473569  |
| 18               | 1                | -0.112938               | 1.496153  | 1.510390  |
| 19               | 8                | -1.535383               | 3.049425  | 2.380272  |

|    |    |           |           |           |
|----|----|-----------|-----------|-----------|
| 20 | 6  | 1.208253  | -0.350686 | -0.010460 |
| 21 | 6  | 1.986633  | 0.897614  | -0.171409 |
| 22 | 6  | 1.399629  | 2.081715  | -0.649156 |
| 23 | 6  | 3.357668  | 0.921072  | 0.101861  |
| 24 | 6  | 2.138857  | 3.239633  | -0.794735 |
| 25 | 6  | 4.109511  | 2.079709  | -0.030543 |
| 26 | 1  | 3.852348  | 0.013117  | 0.427214  |
| 27 | 6  | 3.497357  | 3.252823  | -0.474366 |
| 28 | 1  | 1.685557  | 4.150808  | -1.168747 |
| 29 | 1  | 5.165929  | 2.055750  | 0.206283  |
| 30 | 6  | 1.872609  | -1.628061 | -0.418103 |
| 31 | 6  | 1.772567  | -1.993329 | -1.762317 |
| 32 | 6  | 2.572517  | -2.442302 | 0.484613  |
| 33 | 6  | 2.361935  | -3.156626 | -2.230826 |
| 34 | 1  | 1.199513  | -1.358859 | -2.431912 |
| 35 | 6  | 3.159230  | -3.610533 | -0.009437 |
| 36 | 6  | 3.062924  | -3.968424 | -1.346301 |
| 37 | 1  | 2.271642  | -3.429692 | -3.277507 |
| 38 | 1  | 3.700752  | -4.259465 | 0.672399  |
| 39 | 8  | 4.135958  | 4.435499  | -0.644968 |
| 40 | 1  | 3.531083  | -4.883576 | -1.696109 |
| 41 | 6  | 2.665269  | -2.112048 | 1.967489  |
| 42 | 1  | 2.311487  | -1.084768 | 2.102579  |
| 43 | 6  | 4.100680  | -2.175899 | 2.501450  |
| 44 | 1  | 4.778374  | -1.535310 | 1.928118  |
| 45 | 1  | 4.129369  | -1.848777 | 3.545672  |
| 46 | 1  | 4.500486  | -3.194493 | 2.467658  |
| 47 | 6  | 1.741677  | -3.023382 | 2.787368  |
| 48 | 1  | 0.710583  | -2.943579 | 2.436582  |
| 49 | 1  | 2.050187  | -4.071125 | 2.701302  |
| 50 | 1  | 1.770935  | -2.749501 | 3.847368  |
| 51 | 1  | 0.359947  | 2.077460  | -0.954306 |
| 52 | 35 | -1.648521 | 0.370922  | -2.239164 |
| 53 | 35 | -1.067004 | -1.960118 | 0.399708  |
| 54 | 6  | 5.513037  | 4.504006  | -0.341027 |
| 55 | 1  | 6.098932  | 3.827074  | -0.974155 |

|    |   |          |          |           |
|----|---|----------|----------|-----------|
| 56 | 1 | 5.814636 | 5.532612 | -0.539522 |
| 57 | 1 | 5.704010 | 4.268240 | 0.712540  |

Table S21. Standard orientation of the optimized geometry for the TC isomer of 2,10-Br-NP.

| Center<br>Number | Atomic<br>Number | Coordinates (Angstroms) |           |           |
|------------------|------------------|-------------------------|-----------|-----------|
|                  |                  | X                       | Y         | Z         |
| 1                | 6                | -6.140521               | -0.390440 | -0.481816 |
| 2                | 6                | -5.668385               | -1.596080 | 0.007271  |
| 3                | 6                | -4.315547               | -1.766570 | 0.296684  |
| 4                | 6                | -3.379401               | -0.728287 | 0.060114  |
| 5                | 6                | -3.904347               | 0.498854  | -0.368469 |
| 6                | 6                | -5.256330               | 0.664859  | -0.646395 |
| 7                | 6                | -3.883108               | -3.014204 | 0.919138  |
| 8                | 6                | -1.951392               | -1.058514 | 0.281108  |
| 9                | 6                | -1.639268               | -2.143912 | 1.263407  |
| 10               | 6                | -2.650745               | -3.195595 | 1.409290  |
| 11               | 6                | 0.462893                | -0.966454 | -0.502663 |
| 12               | 6                | -0.942723               | -0.534447 | -0.444773 |
| 13               | 1                | -4.640363               | -3.784647 | 1.040165  |
| 14               | 1                | -7.193202               | -0.257172 | -0.707069 |
| 15               | 1                | -6.351715               | -2.420629 | 0.186727  |
| 16               | 1                | -5.608792               | 1.633957  | -0.978653 |
| 17               | 1                | -2.357977               | -4.087981 | 1.951090  |
| 18               | 1                | -1.168102               | 0.268817  | -1.137774 |
| 19               | 8                | -0.587637               | -2.163812 | 1.881702  |
| 20               | 6                | 1.524880                | -0.146003 | -0.456855 |
| 21               | 6                | 1.355946                | 1.288411  | -0.112579 |
| 22               | 6                | 0.487870                | 1.703406  | 0.907939  |
| 23               | 6                | 2.085509                | 2.270382  | -0.786433 |
| 24               | 6                | 0.330258                | 3.042478  | 1.213104  |
| 25               | 6                | 1.932405                | 3.619757  | -0.494548 |
| 26               | 1                | 2.785310                | 1.975673  | -1.561268 |
| 27               | 6                | 1.046113                | 4.012282  | 0.508927  |
| 28               | 1                | -0.336929               | 3.363282  | 2.005538  |
| 29               | 1                | 2.508494                | 4.350612  | -1.048480 |
| 30               | 6                | 2.910433                | -0.611845 | -0.767968 |

|    |    |           |           |           |
|----|----|-----------|-----------|-----------|
| 31 | 6  | 3.266176  | -0.765709 | -2.109491 |
| 32 | 6  | 3.852041  | -0.860178 | 0.243296  |
| 33 | 6  | 4.551868  | -1.143766 | -2.469251 |
| 34 | 1  | 2.515771  | -0.588198 | -2.874393 |
| 35 | 6  | 5.136808  | -1.249138 | -0.139604 |
| 36 | 6  | 5.491941  | -1.384242 | -1.475419 |
| 37 | 1  | 4.814562  | -1.253781 | -3.516795 |
| 38 | 1  | 5.878269  | -1.456472 | 0.625413  |
| 39 | 8  | 0.823586  | 5.299030  | 0.878298  |
| 40 | 1  | 6.501960  | -1.684471 | -1.738098 |
| 41 | 6  | 3.459529  | -0.805066 | 1.710544  |
| 42 | 1  | 2.566979  | -0.178072 | 1.792013  |
| 43 | 6  | 4.532735  | -0.181570 | 2.606298  |
| 44 | 1  | 4.829857  | 0.808659  | 2.247314  |
| 45 | 1  | 4.150466  | -0.072937 | 3.626145  |
| 46 | 1  | 5.431525  | -0.804409 | 2.664109  |
| 47 | 6  | 3.072650  | -2.208486 | 2.199951  |
| 48 | 1  | 2.289604  | -2.638079 | 1.571313  |
| 49 | 1  | 3.939727  | -2.878648 | 2.173044  |
| 50 | 1  | 2.701139  | -2.170626 | 3.229002  |
| 51 | 1  | -0.047472 | 0.957293  | 1.484460  |
| 52 | 35 | -2.849985 | 2.077539  | -0.512924 |
| 53 | 35 | 0.732397  | -2.819413 | -0.881370 |
| 54 | 6  | 1.541622  | 6.317684  | 0.216139  |
| 55 | 1  | 1.218689  | 7.256550  | 0.666585  |
| 56 | 1  | 2.623251  | 6.203126  | 0.355396  |
| 57 | 1  | 1.317474  | 6.336365  | -0.857193 |

Table S22. Standard orientation of the optimized geometry for the CC isomer of 2,10-Br-NP.

| Center<br>Number | Atomic<br>Number | Coordinates (Angstroms) |           |           |
|------------------|------------------|-------------------------|-----------|-----------|
|                  |                  | X                       | Y         | Z         |
| 1                | 6                | 6.357409                | -0.440707 | -0.346548 |
| 2                | 6                | 5.770831                | -0.171073 | -1.569646 |
| 3                | 6                | 4.386949                | -0.042994 | -1.682634 |
| 4                | 6                | 3.537057                | -0.219509 | -0.562665 |
| 5                | 6                | 4.173013                | -0.430215 | 0.670881  |



|    |   |           |           |           |
|----|---|-----------|-----------|-----------|
| 6  | 6 | 5.553353  | -0.549788 | 0.778376  |
| 7  | 6 | 3.818901  | 0.339458  | -2.967521 |
| 8  | 6 | 2.075502  | -0.152036 | -0.788164 |
| 9  | 6 | 1.577226  | 0.543653  | -2.010086 |
| 10 | 6 | 2.524624  | 0.638982  | -3.127503 |
| 11 | 6 | -0.235808 | -1.034975 | -0.168500 |
| 12 | 6 | 1.218196  | -0.914750 | -0.071100 |
| 13 | 1 | 4.510619  | 0.431139  | -3.801016 |
| 14 | 1 | 7.433742  | -0.540372 | -0.256223 |
| 15 | 1 | 6.383820  | -0.041992 | -2.456529 |
| 16 | 1 | 5.991747  | -0.716480 | 1.754843  |
| 17 | 1 | 2.117064  | 0.988836  | -4.069588 |
| 18 | 1 | 1.647844  | -1.625489 | 0.627521  |
| 19 | 8 | 0.426200  | 0.934816  | -2.134264 |
| 20 | 6 | -1.188547 | -0.133302 | 0.128295  |
| 21 | 6 | -0.796787 | 1.194177  | 0.695550  |
| 22 | 6 | -1.223680 | 2.423423  | 0.153506  |
| 23 | 6 | -0.027110 | 1.187784  | 1.863817  |
| 24 | 6 | -0.854564 | 3.592152  | 0.821016  |
| 25 | 6 | 0.336697  | 2.363371  | 2.503462  |
| 26 | 1 | 0.285662  | 0.235725  | 2.277357  |
| 27 | 6 | -0.086115 | 3.575627  | 1.977831  |
| 28 | 1 | -1.174086 | 4.548305  | 0.418143  |
| 29 | 1 | 0.941697  | 2.326882  | 3.403936  |
| 30 | 1 | 0.180517  | 4.509508  | 2.463791  |
| 31 | 6 | -2.641353 | -0.436289 | 0.077381  |
| 32 | 6 | -3.255650 | -0.964837 | -1.066302 |
| 33 | 6 | -3.442389 | -0.162697 | 1.183696  |
| 34 | 6 | -4.613393 | -1.213463 | -1.093550 |
| 35 | 1 | -2.655608 | -1.168004 | -1.946254 |
| 36 | 6 | -4.808594 | -0.427696 | 1.178706  |
| 37 | 1 | -2.991219 | 0.263471  | 2.074148  |
| 38 | 6 | -5.400016 | -0.954059 | 0.032571  |
| 39 | 1 | -5.095930 | -1.610375 | -1.979903 |
| 40 | 1 | -5.394047 | -0.214392 | 2.064365  |
| 41 | 8 | -6.721001 | -1.240156 | -0.090926 |

|    |    |           |           |           |
|----|----|-----------|-----------|-----------|
| 42 | 6  | -2.058108 | 2.532156  | -1.114644 |
| 43 | 1  | -2.085760 | 1.547333  | -1.583089 |
| 44 | 6  | -3.498358 | 2.955119  | -0.794856 |
| 45 | 1  | -3.521230 | 3.948778  | -0.333147 |
| 46 | 1  | -4.094074 | 3.001153  | -1.712726 |
| 47 | 1  | -3.983164 | 2.254105  | -0.110645 |
| 48 | 6  | -1.436534 | 3.488722  | -2.139330 |
| 49 | 1  | -0.421340 | 3.178765  | -2.391956 |
| 50 | 1  | -2.033203 | 3.484924  | -3.057790 |
| 51 | 1  | -1.410424 | 4.520641  | -1.773269 |
| 52 | 35 | 3.245111  | -0.491616 | 2.338121  |
| 53 | 35 | -0.675772 | -2.870252 | -0.542002 |
| 54 | 6  | -7.563041 | -0.989701 | 1.013282  |
| 55 | 1  | -7.266815 | -1.581349 | 1.887831  |
| 56 | 1  | -7.567210 | 0.073217  | 1.283174  |
| 57 | 1  | -8.565343 | -1.285432 | 0.702416  |

Table S23. Standard orientation of the optimized geometry for the CF isomer of 2,10-Br-NP.

| Center<br>Number | Atomic<br>Number | Coordinates (Angstroms) |           |           |
|------------------|------------------|-------------------------|-----------|-----------|
|                  |                  | X                       | Y         | Z         |
| 1                | 35               | -0.867656               | -2.820800 | 0.357997  |
| 2                | 35               | 4.004146                | -1.859413 | 0.884701  |
| 3                | 8                | -0.348121               | 0.933213  | -1.138495 |
| 4                | 6                | 1.873545                | 0.108693  | -0.809112 |
| 5                | 8                | -6.179971               | -1.123532 | -1.782563 |
| 6                | 6                | -0.103965               | 0.763589  | 3.594340  |
| 7                | 1                | 0.362212                | 0.224177  | 4.412665  |
| 8                | 6                | 4.329426                | -0.441073 | -0.350986 |
| 9                | 6                | 3.286943                | 0.348212  | -0.919582 |
| 10               | 6                | 3.716647                | 1.500013  | -1.651349 |
| 11               | 6                | -0.056404               | -1.180196 | -0.115982 |
| 12               | 6                | 1.240684                | -1.146941 | -0.418903 |
| 13               | 1                | 1.808721                | -2.063552 | -0.438744 |
| 14               | 6                | -0.591828               | 2.048034  | 3.776566  |
| 15               | 1                | -0.513847               | 2.537496  | 4.742722  |
| 16               | 6                | -0.209361               | 0.167033  | 2.345741  |

|    |   |           |           |           |
|----|---|-----------|-----------|-----------|
| 17 | 1 | 0.173298  | -0.836897 | 2.213303  |
| 18 | 6 | 2.754052  | 2.411827  | -2.160487 |
| 19 | 1 | 3.107081  | 3.277012  | -2.713261 |
| 20 | 6 | -3.326522 | -0.417321 | 0.435129  |
| 21 | 1 | -3.091276 | -0.355277 | 1.491908  |
| 22 | 6 | -1.187320 | 2.706842  | 2.710531  |
| 23 | 1 | -1.570199 | 3.711370  | 2.864106  |
| 24 | 6 | -4.627769 | -0.735392 | 0.054158  |
| 25 | 1 | -5.374750 | -0.908023 | 0.818957  |
| 26 | 6 | -0.798935 | 0.824638  | 1.264040  |
| 27 | 6 | 6.048233  | 0.922162  | -1.361975 |
| 28 | 1 | 7.102549  | 1.113762  | -1.530102 |
| 29 | 6 | -4.946042 | -0.827217 | -1.298021 |
| 30 | 6 | -3.952374 | -0.605300 | -2.254246 |
| 31 | 1 | -4.217339 | -0.684532 | -3.302954 |
| 32 | 6 | 5.656767  | -0.174112 | -0.575942 |
| 33 | 1 | 6.406270  | -0.806319 | -0.114891 |
| 34 | 6 | -0.892228 | 0.092812  | -0.088612 |
| 35 | 6 | -2.002816 | 2.942557  | 0.359027  |
| 36 | 1 | -2.036935 | 2.352776  | -0.554908 |
| 37 | 6 | -2.333409 | -0.185787 | -0.507499 |
| 38 | 6 | 5.089835  | 1.754832  | -1.867404 |
| 39 | 1 | 5.365735  | 2.633943  | -2.442081 |
| 40 | 6 | -2.663940 | -0.296727 | -1.860860 |
| 41 | 1 | -1.900523 | -0.128110 | -2.611016 |
| 42 | 6 | 1.423070  | 2.230168  | -1.944698 |
| 43 | 1 | 0.676062  | 2.925458  | -2.309697 |
| 44 | 6 | -3.450823 | 3.278858  | 0.736791  |
| 45 | 1 | -4.034007 | 2.369946  | 0.908252  |
| 46 | 1 | -3.930724 | 3.840701  | -0.071523 |
| 47 | 1 | -3.503548 | 3.891857  | 1.642591  |
| 48 | 6 | 0.994300  | 1.082399  | -1.247779 |
| 49 | 6 | -1.211879 | 4.219281  | 0.045340  |
| 50 | 1 | -1.184900 | 4.898120  | 0.904304  |
| 51 | 1 | -1.675218 | 4.759259  | -0.787491 |
| 52 | 1 | -0.178057 | 3.989096  | -0.227319 |

|    |   |           |           |           |
|----|---|-----------|-----------|-----------|
| 53 | 6 | -7.216303 | -1.367553 | -0.857179 |
| 54 | 1 | -6.988793 | -2.226850 | -0.214863 |
| 55 | 1 | -8.105305 | -1.587004 | -1.449093 |
| 56 | 1 | -7.409283 | -0.490362 | -0.227700 |
| 57 | 6 | -1.314861 | 2.124329  | 1.447428  |

---

## 12. References

- S1. M. Frigerio, M. Santagostino, S. Squore, *J. Org. Chem.* 1999, **64**, 4537–4538.
- S2. Sheldrick GM. *SHELXS-97* and *SHELXL-97*; University of Gottingen, Germany, 1997.
- S3. Sheldrick GM. *SADABS*; University of Gottingen, Germany, 1996.
- S4. Gaussian 09, Revision D.01, M. J. Frisch, G. W. Trucks, H. B. Schlegel, G. E. Scuseria, M. A. Robb, J. R. Cheeseman, G. Scalmani, V. Barone, B. Mennucci, G. A. Petersson, H. Nakatsuji, M. Caricato, X. Li, H. P. Hratchian, A. F. Izmaylov, J. Bloino, G. Zheng, J. L. Sonnenberg, M. Hada, M. Ehara, K. Toyota, R. Fukuda, J. Hasegawa, M. Ishida, T. Nakajima, Y. Honda, O. Kitao, H. Nakai, T. Vreven, J. A. Montgomery, Jr., J. E. Peralta, F. Ogliaro, M. Bearpark, J. J. Heyd, E. Brothers, K. N. Kudin, V. N. Staroverov, R. Kobayashi, J. Normand, K. Raghavachari, A. Rendell, J. C. Burant, S. S. Iyengar, J. Tomasi, M. Cossi, N. Rega, J. M. Millam, M. Klene, J. E. Knox, J. B. Cross, V. Bakken, C. Adamo, J. Jaramillo, R. Gomperts, R. E. Stratmann, O. Yazyev, A. J. Austin, R. Cammi, C. Pomelli, J. W. Ochterski, R. L. Martin, K. Morokuma, V. G. Zakrzewski, G. A. Voth, P. Salvador, J. J. Dannenberg, S. Dapprich, A. D. Daniels, Ö. Farkas, J. B. Foresman, J. V. Ortiz, J. Cioslowski, and D. J. Fox, Gaussian, Inc., Wallingford CT, 2009.
